# Supplementary material for: Stress-responsive and metabolic gene regulation are altered in low S-adenosylmethionine
Source: PLoS Genet. 2018 Nov 28;14(11):e1007812. doi: 10.1371/journal.pgen.1007812 (PMC6287882; doi:10.1371/journal.pgen.1007812)
Supplement: S2 Table — Genes appearing in Troemel, et al. [28] are designated. (XLSX) [file pgen.1007812.s010.xlsx]

## Sheet: control UP PA14
wormbase_id	geane_name	sequence	padj	log2FoldChange		Troemel 4 hour	Troemel 8 hour
WBGene00007872		C32H11.9	8.73e-115	8.18635
WBGene00018760	irg-3	F53E10.4	2.56e-249	6.03035		yes	yes
WBGene00007366		C06B3.7	1.11e-96	5.96414		yes	yes
WBGene00007097		B0024.4	0	5.95134		yes	yes
WBGene00003999	pgp-5	C05A9.1	5.42e-183	5.76089		yes	yes
WBGene00001786	gst-38	F35E8.8	6.36e-139	5.74199		yes	yes
WBGene00018708	oac-32	F52F10.4	1.89e-70	5.43485			yes
WBGene00020760		T24C4.4	1.6e-178	5.33675		yes	yes
WBGene00019660		K11H12.4	1.06e-195	5.22915		yes	yes
WBGene00007873	dod-21	C32H11.10	9.24e-138	5.00777
WBGene00016845		C50F7.5	6.73e-40	4.9613		yes	yes
WBGene00009428		F35E12.4	9.55e-75	4.90652		yes	yes
WBGene00020579		T19D12.4	1.43e-164	4.84086
WBGene00004000	pgp-6	T21E8.1	1.2e-95	4.73719
WBGene00021464	ugt-31	Y39G10AR.6	8.34e-67	4.70902		yes	yes
WBGene00011799		T16G1.5	3.78e-48	4.70756			yes
WBGene00000783	cpr-3	T10H4.12	1.14e-201	4.69976		yes	yes
WBGene00021805		Y53G8AM.5	2.49e-46	4.65823			yes
WBGene00015574	irg-1	C07G3.2	3.57e-25	4.62043		yes	yes
WBGene00009914		F49H6.13	4.42e-24	4.5888		yes	yes
WBGene00011494		T05F1.9	1.29e-34	4.57095		yes	yes
WBGene00015932		C17H12.6	1.96e-102	4.51591		yes	yes
WBGene00007506		C10C5.2	5.18e-47	4.51191		yes	yes
WBGene00016424		C34H4.1	9.87e-75	4.37066		yes	yes
WBGene00017467		F14F9.4	2.79e-89	4.34733		yes	yes
WBGene00004052	parg-2	H23L24.5	1.51e-21	4.3022		yes
WBGene00045457		F33H12.7	1.18e-52	4.25876
WBGene00012923	fbxa-128	Y47D3A.2	5.37e-44	4.21461		yes	yes
WBGene00008577		F08G2.5	1.47e-41	4.21236			yes
WBGene00045411		C25F9.11	8.84e-31	4.20186
WBGene00009432	cld-9	F35E12.8	5.5e-146	4.15936		yes	yes
WBGene00021978		Y58A7A.4	1.69e-28	4.09176		yes	yes
WBGene00008105		C45B11.2	3.12e-27	4.07658
WBGene00020580		T19D12.5	6.12e-24	4.04939
WBGene00021979		Y58A7A.5	1.37e-43	4.04479		yes	yes
WBGene00016577	clec-3	C41H7.7	4.83e-40	3.98108		yes	yes
WBGene00008988		F20G2.5	6.95e-37	3.97738		yes	yes
WBGene00007717		C25D7.5	2.59e-51	3.88336		yes	yes
WBGene00020747		T24A6.7	1.02e-15	3.87199
WBGene00021580	clec-174	Y46C8AL.2	7.55e-58	3.86899		yes	yes
WBGene00016785		C49G7.7	2.93e-16	3.83256		yes	yes
WBGene00021977		Y58A7A.3	1.95e-64	3.78036		yes	yes
WBGene00045416		Y37H2A.14	2.76e-42	3.7263
WBGene00017764		F25A2.1	2.61e-41	3.70203		yes	yes
WBGene00021520		Y41D4B.18	2.71e-32	3.69822		yes	yes
WBGene00006627	tsp-1	C02F5.8	6.7e-39	3.68453		yes	yes
WBGene00008900		F16H6.10	5.83e-40	3.68178			yes
WBGene00017678	asp-12	F21F8.4	6.71e-112	3.6737		yes	yes
WBGene00008476		E03H4.8	4.02e-61	3.64531
WBGene00044457		C18H7.11	1.02e-34	3.62616
WBGene00010019		F54B8.4	7.05e-25	3.57313		yes	yes
WBGene00021585	clec-74	Y46C8AL.8	3.47e-28	3.55789		yes	yes
WBGene00009431	dct-17	F35E12.7	1.53e-103	3.54062		yes	yes
WBGene00016783	irg-2	C49G7.5	3.93e-14	3.47755		yes	yes
WBGene00013090		Y51B9A.8	4.49e-13	3.47637		yes	yes
WBGene00012450		Y17D7B.2	9.64e-17	3.46744		yes	yes
WBGene00010822		M01G12.9	1.37e-36	3.42362		yes	yes
WBGene00219709	linc-37	K02F3.14	1.07e-12	3.41807
WBGene00017093		E02C12.8	9.05e-12	3.4157			yes
WBGene00009957		F53B2.8	1.02e-15	3.39626		yes	yes
WBGene00019779		M60.2	1.27e-125	3.39058		yes	yes
WBGene00012824		Y43F8B.14	3.11e-17	3.37854			yes
WBGene00007875	dod-24	C32H11.12	1.59e-69	3.37038		yes	yes
WBGene00013119		Y51H4A.25	1.38e-19	3.36455
WBGene00019146		H02F09.3	7.87e-64	3.35243		yes	yes
WBGene00007322		C05B5.5	2.95e-11	3.34838
WBGene00018966		F56D2.5	4.36e-24	3.31862			yes
WBGene00001158	ech-9	F01G10.3	1.08e-19	3.28975		yes	yes
WBGene00018707	oac-31	F52F10.3	1.17e-41	3.2859		yes	yes
WBGene00016788		C49G7.10	2.49e-46	3.27749		yes	yes
WBGene00021435		Y39A3A.4	1.86e-13	3.2619
WBGene00019564		K09D9.1	4.88e-23	3.25511		yes	yes
WBGene00010123		F55G11.2	2.23e-13	3.25288		yes	yes
WBGene00018971	clec-67	F56D6.2	3.97e-14	3.21104		yes	yes
WBGene00021262	fbxa-74	Y22D7AR.9	9.61e-40	3.20297		yes	yes
WBGene00006628	tsp-2	C02F5.11	5.32e-21	3.17332		yes	yes
WBGene00013901	ugt-16	ZC443.6	7.72e-24	3.0813		yes	yes
WBGene00016425		C34H4.2	3.66e-78	3.07624		yes
WBGene00018874	tag-234	F55C12.7	7.23e-35	3.0701		yes	yes
WBGene00011445		T04F8.7	3.04e-45	3.02875		yes	yes
WBGene00015598	fbxa-163	C08E3.6	1.51e-09	3.02171
WBGene00077525		C41G7.8	1.23e-12	3.01436
WBGene00007414		C07E3.3	1.94e-54	3.01348		yes
WBGene00008199		C49C3.9	1.6e-93	3.01129		yes	yes
WBGene00022382		Y94H6A.10	7.7e-39	3.00417
WBGene00018725	kreg-1	F53A9.2	6.25e-32	2.9992		yes	yes
WBGene00019738	clec-265	M02F4.7	1.01e-46	2.99863		yes	yes
WBGene00018646	mul-1	F49F1.6	3.61e-32	2.99685		yes	yes
WBGene00019273		H43E16.1	3.8e-75	2.97852		yes	yes
WBGene00044073	tag-244	C34H4.3	7.81e-42	2.9767		yes	yes
WBGene00017466		F14F9.3	1.01e-09	2.96718
WBGene00016762	ugt-24	C49A9.8	1.77e-17	2.93518
WBGene00014136		ZK896.5	3.88e-10	2.91916		yes	yes
WBGene00044681		T24C4.8	1.83e-10	2.91682
WBGene00009724		F45D3.4	2.09e-40	2.88783			yes
WBGene00021253		Y22D7AL.15	1.07e-47	2.88757		yes	yes
WBGene00016218		C29F9.3	3.31e-42	2.88411		yes	yes
WBGene00016219		C29F9.4	1.27e-29	2.8786			yes
WBGene00007153	clec-41	B0365.6	4.16e-110	2.87522
WBGene00012144		T28H10.3	1.35e-56	2.86672
WBGene00001817	haf-7	Y50E8A.16	1.19e-47	2.86407		yes	yes
WBGene00010125	dod-22	F55G11.5	3.36e-41	2.85762		yes	yes
WBGene00010126		F55G11.6	5.37e-08	2.84438		yes	yes
WBGene00015859		C16D9.4	9.26e-39	2.83032		yes	yes
WBGene00020774		T24E12.5	6.34e-25	2.80878		yes
WBGene00206489		F53F1.14	1.22e-09	2.80619
WBGene00003091	lys-2	Y22F5A.5	4.38e-70	2.79116
WBGene00017093		E02C12.8	3.1e-14	2.78874			yes
WBGene00018459		F45D11.14	2.05e-58	2.7875
WBGene00021519		Y41D4B.17	5.88e-20	2.77537		yes	yes
WBGene00021518	hpo-6	Y41D4B.16	1.22e-83	2.75588		yes	yes
WBGene00015947		C18A11.1	7.29e-19	2.74718		yes	yes
WBGene00006533	tba-7	T28D6.2	1.96e-27	2.74551
WBGene00009971		F53C11.1	2.37e-47	2.74305		yes
WBGene00010658		K08D8.4	3.8e-23	2.74175		yes	yes
WBGene00206354		F27E5.9	6.93e-24	2.73411
WBGene00000522	clc-1	C09F12.1	4.46e-71	2.70321		yes	yes
WBGene00007440		C08E8.4	1.7e-07	2.69335		yes
WBGene00007864		C32H11.1	8.21e-22	2.6873		yes	yes
WBGene00002274	lec-11	F38A5.3	1.2e-55	2.68324		yes	yes
WBGene00000373	cyp-14A5	F08F3.7	7.56e-22	2.67649		yes	yes
WBGene00008850		F15B9.6	7.73e-08	2.66466		yes
WBGene00017199	clec-45	F07C4.2	3.12e-07	2.65734		yes	yes
WBGene00015597	fbxa-162	C08E3.5	5.03e-10	2.65584
WBGene00019659		K11H12.3	7.23e-11	2.64463			yes
WBGene00194803		C25F9.16	5.45e-07	2.64266
WBGene00021709	ugt-29	Y49C4A.8	8.51e-41	2.62911		yes	yes
WBGene00009433		F35E12.9	2.91e-27	2.62766
WBGene00010660		K08D8.6	2.07e-75	2.62714		yes	yes
WBGene00022891		ZK1290.10	2.7e-10	2.62548		yes	yes
WBGene00023423		F43C1.7	2.29e-07	2.62426
WBGene00018729		F53A9.6	8.93e-49	2.62306		yes	yes
WBGene00044468		Y69A2AL.2	1.2e-36	2.62255
WBGene00000841	cul-6	K08E7.7	1.81e-15	2.61889		yes	yes
WBGene00006650	tts-1	F09E10.11	4.84e-37	2.61771
WBGene00012961		Y47H10A.5	3.42e-34	2.61583		yes	yes
WBGene00010749		K10D11.5	2.6e-32	2.61236		yes	yes
WBGene00018731		F53A9.8	1.75e-24	2.60506			yes
WBGene00022142		Y71G12B.2	3.13e-08	2.60194
WBGene00014135		ZK896.4	4.71e-21	2.59749		yes	yes
WBGene00010745	dod-17	K10D11.1	3.54e-13	2.59596		yes	yes
WBGene00003702	nhr-112	Y70C5C.6	8.17e-11	2.57608		yes	yes
WBGene00022570	sdz-35	ZC239.12	8.4e-07	2.55356			yes
WBGene00021118	clec-125	W09G10.6	2.67e-07	2.53586
WBGene00000562	cng-1	F14H8.6	1.06e-06	2.53162
WBGene00010977		R02D5.3	6.96e-14	2.52988		yes	yes
WBGene00012518	comt-2	Y32B12A.3	5.14e-08	2.52819		yes
WBGene00000795	crn-2	CD4.2	9.23e-23	2.52328			yes
WBGene00015933		C17H12.8	1.94e-52	2.4925		yes	yes
WBGene00019435		K06A9.1	1.96e-41	2.48655
WBGene00011894	ttr-23	T21C9.8	7.9e-12	2.48309		yes
WBGene00007867		C32H11.4	1.36e-07	2.48012		yes	yes
WBGene00011330		T01D3.6	2.2e-07	2.47577		yes	yes
WBGene00011699	cyp-34A2	T10H4.11	8.24e-13	2.47548
WBGene00013841	fbxa-33	ZC47.9	2.78e-07	2.45799
WBGene00012910		Y46G5A.20	5.27e-15	2.44918		yes
WBGene00012451		Y17D7B.3	6.66e-06	2.42683		yes	yes
WBGene00009488	oac-20	F36G9.12	1.45e-37	2.42447		yes
WBGene00012101	zip-10	T27F2.4	2.34e-20	2.39774		yes	yes
WBGene00002188	kgb-2	ZC416.4	9.8e-11	2.39545
WBGene00022848		ZK1055.7	5.91e-26	2.38926
WBGene00004811	skr-5	F47H4.10	2.03e-07	2.38085			yes
WBGene00010899		M28.8	1.59e-41	2.37827		yes	yes
WBGene00021590		Y46D2A.2	1.25e-43	2.37737		yes	yes
WBGene00011733		T12D8.5	3.49e-29	2.37488
WBGene00018601		F48C1.9	2.9e-06	2.37483
WBGene00018823		F54E2.1	3.09e-69	2.36865
WBGene00007460		C08F11.13	9.23e-23	2.35677
WBGene00012583	clec-4	Y38E10A.5	6.66e-06	2.35197		yes	yes
WBGene00010658		K08D8.4	8.24e-20	2.33457		yes	yes
WBGene00008486	ugt-44	F01D4.2	4.57e-71	2.3315		yes
WBGene00015048	faah-2	B0218.2	1.35e-38	2.32941		yes	yes
WBGene00022040		Y65B4BR.1	2.45e-09	2.31875
WBGene00022736		ZK418.7	2.37e-12	2.3078		yes	yes
WBGene00016379		C33H5.13	6.35e-32	2.29771		yes	yes
WBGene00021517		Y41D4B.15	1.56e-06	2.2941
WBGene00008726		F13A7.11	4.54e-10	2.29222		yes	yes
WBGene00011737	sqst-1	T12G3.1	3.27e-42	2.29158		yes
WBGene00019404		K05B2.4	2.75e-07	2.29		yes	yes
WBGene00019170		H06I04.6	9.9e-23	2.28994
WBGene00194926		K08D8.12	1.99e-07	2.28993
WBGene00007833	oac-6	C31A11.5	6.28e-18	2.28625		yes	yes
WBGene00018839		F54H5.2	1.1e-05	2.27502
WBGene00077593		C49G7.12	3.01e-05	2.2726
WBGene00044166		C54C6.7	1.28e-08	2.26728
WBGene00009226	cyp-37B1	F28G4.1	5.24e-09	2.26398		yes
WBGene00009805		F47B8.4	1.85e-05	2.26382
WBGene00022847		ZK1055.6	1.65e-16	2.2615
WBGene00008495		F01D5.5	3.41e-23	2.25882		yes	yes
WBGene00008483		E04D5.4	1.48e-06	2.25567
WBGene00015823		C16B8.3	5.64e-42	2.24648		yes
WBGene00006680	twk-28	C52B9.6	1.67e-09	2.24012
WBGene00013845	fbxa-37	ZC47.14	8.31e-09	2.23449
WBGene00010470	cdr-4	K01D12.11	2.7e-22	2.22727		yes	yes
WBGene00021879	clec-83	Y54G2A.14	3.72e-52	2.22682			yes
WBGene00004809	skr-3	F44G3.6	1.29e-32	2.22602
WBGene00004987	spp-2	T08A9.12	6.65e-33	2.22499
WBGene00015216	valv-1	B0496.7	1e-15	2.22061		yes	yes
WBGene00003605	nhr-6	C48D5.1	1.1e-10	2.21743		yes	yes
WBGene00012622		Y38H6C.9	2.84e-05	2.21
WBGene00002269	lec-6	Y55B1AR.1	3.68e-99	2.20801
WBGene00011672	cyp-13A5	T10B9.2	7.57e-16	2.20737		yes	yes
WBGene00018724		F53A9.1	1.67e-22	2.20505		yes	yes
WBGene00022329	fbxa-79	Y82E9BL.13	1.27e-10	2.19405			yes
WBGene00013559		Y75B8A.28	3.18e-23	2.19303		yes	yes
WBGene00009433		F35E12.9	2.49e-18	2.18915
WBGene00008599		F09A5.2	2.41e-13	2.18382
WBGene00007689		C18E9.9	5.08e-26	2.18318		yes
WBGene00000841	cul-6	K08E7.7	1.71e-06	2.18305		yes	yes
WBGene00012622		Y38H6C.9	6.5e-05	2.17986
WBGene00012529		Y32F6A.4	1.51e-39	2.17841
WBGene00008229		C50F4.1	1.34e-21	2.17776		yes	yes
WBGene00018350	ifo-1	F42C5.10	9.5e-21	2.17084			yes
WBGene00021556		Y45G5AM.3	1.41e-14	2.16689
WBGene00044206		T26H5.9	1.77e-13	2.16354
WBGene00021703	cpt-3	Y48G9A.10	4.8e-05	2.15294
WBGene00044402		Y82E9BL.18	2.11e-07	2.15088
WBGene00009393	clec-62	F35C5.5	5.75e-40	2.1449
WBGene00006470	tag-120	F40F9.2	2.49e-19	2.13068
WBGene00016379		C33H5.13	5.82e-07	2.12976		yes	yes
WBGene00006611	tre-5	C23H3.7	1.74e-09	2.12794
WBGene00001770	gst-22	F21H7.1	7.36e-13	2.12605		yes	yes
WBGene00019213		H20E11.1	2.34e-21	2.11987
WBGene00004796	sid-2	ZK520.2	2.83e-22	2.11755
WBGene00003092	lys-3	Y22F5A.6	6.41e-10	2.11588		yes	yes
WBGene00010851		M04C3.2	1.38e-09	2.11089
WBGene00013119		Y51H4A.25	9.68e-06	2.10792
WBGene00021178		Y9C9A.8	8.74e-07	2.10788
WBGene00017484		F15E6.3	3.13e-09	2.10382		yes
WBGene00011844		T19C9.8	1.78e-05	2.10316
WBGene00005003	spp-18	F27C8.4	2.47e-19	2.09721
WBGene00002273	lec-10	W01A11.4	4.59e-85	2.09674
WBGene00008019		C38H2.2	1.27e-41	2.09286		yes	yes
WBGene00008255		C51E3.10	9.61e-09	2.09038
WBGene00016332		C32F10.4	3.52e-32	2.08554
WBGene00017361		F10E9.12	8.98e-11	2.07988
WBGene00008255		C51E3.10	1.52e-06	2.0767
WBGene00001754	gst-6	F11G11.3	6.06e-14	2.07119		yes	yes
WBGene00003561	ncr-1	F02E8.6	5.87e-31	2.07101		yes
WBGene00015100		B0280.2	1.33e-05	2.06915
WBGene00008498		F01D5.8	4.36e-10	2.05989
WBGene00000022	abt-4	Y39D8C.1	4.8e-30	2.05873
WBGene00016361	drd-10	C33G8.3	9.58e-06	2.05616
WBGene00009798		F46G10.4	1.64e-16	2.0528
WBGene00010475		K01F9.2	1.95e-12	2.04508
WBGene00017905		F28F5.6	1.13e-11	2.04345
WBGene00001852	hil-1	C30G7.1	4.01e-10	2.04172
WBGene00017093		E02C12.8	3.07e-06	2.03764			yes
WBGene00011213		R10E8.8	6.69e-10	2.03187
WBGene00018461		F45D11.16	2.2e-11	2.02537
WBGene00018460		F45D11.15	2.2e-11	2.02537
WBGene00010747		K10D11.3	2.52e-12	2.02305		yes
WBGene00008944		F19B2.5	2.22e-17	2.02291		yes	yes
WBGene00012464	arrd-7	Y17G7B.11	8.79e-18	2.01848
WBGene00003943	pbo-4	K09C8.1	2.66e-27	2.01094
WBGene00000191	arl-7	F20D1.5	8.92e-05	2.00851
WBGene00008922		F17C11.11	8.17e-20	2.00845		yes
WBGene00018562		F47D12.6	1.76e-16	2.00258		yes
WBGene00009429		F35E12.5	2.14e-51	2.00039			yes
WBGene00013963	sulp-8	ZK287.2	5.62e-05	1.99777
WBGene00014164	lact-2	ZK945.1	4.8e-33	1.99561
WBGene00019547		K09C4.1	1.91e-11	1.99478		yes	yes
WBGene00019973		R09A1.3	1.19e-09	1.99442
WBGene00020456	fbxa-60	T12B5.10	1.49e-22	1.99337
WBGene00015713		C12D12.1	1.74e-27	1.9929
WBGene00020455	fbxa-59	T12B5.8	4.29e-11	1.98812			yes
WBGene00012027	fbxa-127	T25E12.12	0.000126565	1.98422
WBGene00013080		Y51A2D.13	6.08e-28	1.98178		yes
WBGene00000973	dhs-9	Y32H12A.3	1.71e-27	1.97705		yes
WBGene00006464	bath-47	T07H3.1	1e-06	1.97324
WBGene00013119		Y51H4A.25	1.38e-07	1.96953
WBGene00015695	ugt-26	C10H11.6	2.61e-19	1.96698			yes
WBGene00016769		C49C8.5	3.73e-43	1.96599		yes	yes
WBGene00005833	srw-86	C25F9.7	0.000410372	1.96594
WBGene00010659		K08D8.5	3.29e-23	1.96182		yes	yes
WBGene00021354	fpn-1.1	Y37E3.16	7.4e-16	1.95788
WBGene00022326	fbxa-14	Y82E9BL.10	2.9e-11	1.95762		yes	yes
WBGene00019958		R08E3.2	5.89e-16	1.95488
WBGene00009595		F40F12.7	2.73e-22	1.95474
WBGene00011182		R09H10.5	4.71e-30	1.95361
WBGene00044660	fbxa-87	F44G3.13	0.000274646	1.95048
WBGene00022486	fbxa-61	Y119D3B.8	2.28e-06	1.94588
WBGene00022494	fbxa-91	Y119D3B.18	1.76e-05	1.93717
WBGene00014132		ZK896.1	0.000153738	1.93161
WBGene00009023		F21G4.1	2.06e-17	1.92945
WBGene00010128		F55G11.8	6.94e-15	1.92774		yes	yes
WBGene00020972	trpl-2	W03B1.2	9.39e-09	1.92021
WBGene00011957		T23F11.6	0.000138308	1.92003
WBGene00009394	clec-63	F35C5.6	4.9e-69	1.91095
WBGene00013900	ugt-18	ZC443.5	0.000617058	1.90975			yes
WBGene00009397	clec-66	F35C5.9	0.000254414	1.90646		yes	yes
WBGene00019261		H34I24.2	7.1e-38	1.90205
WBGene00002021	hsp-17	F52E1.7	1.18e-12	1.89902			yes
WBGene00017726		F22H10.2	3.97e-14	1.89142		yes	yes
WBGene00022643		ZK6.8	1.33e-11	1.89135
WBGene00021768		Y51F10.7	2.45e-35	1.89059
WBGene00003090	lys-1	Y22F5A.4	5.62e-45	1.89004
WBGene00015280		C01B10.6	7.8e-20	1.88762
WBGene00016997	cebp-1	D1005.3	1.02e-19	1.87934
WBGene00011076	scav-5	R07B1.3	4.18e-11	1.87788
WBGene00006649	tth-1	F08F1.8	1.67e-45	1.87585		yes
WBGene00022593		ZC328.3	1.37e-27	1.87345
WBGene00014063	clec-143	ZK673.9	0.000328866	1.87216		yes
WBGene00003778	nnt-1	C15H9.1	2.86e-09	1.86933
WBGene00022375		Y94H6A.2	0.000588507	1.86915			yes
WBGene00018225	nep-14	F40B5.1	0.00039022	1.86561
WBGene00007835	oac-7	C31A11.7	0.000121771	1.86145
WBGene00010605		K06G5.1	1.31e-48	1.85843
WBGene00021865	fbxa-66	Y54F10BM.11	0.000911781	1.85633
WBGene00008234		C50F4.9	2.8e-06	1.85505		yes	yes
WBGene00045507		F10A3.17	1.12e-15	1.85422
WBGene00077770		M04D5.3	2.07e-09	1.85351
WBGene00021020		W04B5.3	1.05e-45	1.85229
WBGene00016542		C39H7.4	2.22e-16	1.83627			yes
WBGene00012462		Y17G7B.8	2.34e-21	1.83393		yes	yes
WBGene00015716	sox-4	C12D12.5	3.7e-13	1.83156
WBGene00017302		F09F7.5	7.44e-23	1.83005
WBGene00000219	asp-6	F21F8.7	8.86e-54	1.83001
WBGene00000214	asp-1	Y39B6A.20	4.59e-57	1.82995
WBGene00011190	swt-6	R10D12.9	6.09e-09	1.82773
WBGene00014771		F55G11.3	2.01e-05	1.82728		yes	yes
WBGene00007919		C34C6.7	1.51e-10	1.82184		yes	yes
WBGene00013639		Y105C5A.15	2.1e-07	1.82106
WBGene00016865	ets-9	C52B9.2	6.96e-14	1.81691
WBGene00019644	cpt-4	K11D12.4	1.76e-12	1.80947		yes	yes
WBGene00017591		F19C7.1	3.15e-44	1.80701
WBGene00077764		F59C6.16	1.74e-15	1.80625
WBGene00002271	lec-8	R07B1.10	1.67e-36	1.80404
WBGene00009895	scl-2	F49E11.10	1.55e-18	1.80402
WBGene00009487	clec-232	F36G9.11	0.000943236	1.79446
WBGene00013146		Y53C12B.7	1.36e-06	1.79245
WBGene00020740		T23F4.2	5.99e-17	1.79087		yes	yes
WBGene00008886		F16C3.2	1.34e-09	1.78879		yes	yes
WBGene00011090		R07B7.6	2.53e-10	1.78673		yes
WBGene00007228	acs-7	C01G6.7	1.51e-12	1.78508		yes	yes
WBGene00018939	fbxa-190	F56C3.2	2.16e-06	1.78344		yes	yes
WBGene00015389	scav-1	C03F11.3	3.1e-20	1.77974
WBGene00010935		M163.1	8.19e-15	1.77882
WBGene00019215		H20E11.3	1.36e-09	1.77814		yes	yes
WBGene00007932	zip-5	C34D1.5	1.21e-14	1.77615		yes
WBGene00009093		F23H12.3	2.13e-10	1.77226		yes
WBGene00012028	srz-99	T25E12.13	0.00109452	1.76825
WBGene00004096	pqm-1	F40F8.7	1.36e-23	1.7667
WBGene00003480	klf-3	F54H5.4	1.5e-12	1.76415			yes
WBGene00010850		M04C3.1	1.02e-15	1.76354
WBGene00015167		B0403.3	2.85e-06	1.76281
WBGene00004993	spp-8	C28C12.5	4.52e-37	1.76122
WBGene00009396	clec-65	F35C5.8	1.62e-35	1.76089
WBGene00006965	xtr-1	F54F7.4	0.00034332	1.7604
WBGene00002041	hum-8	Y66H1A.6	1.65e-16	1.75772
WBGene00021635		Y47G6A.5	7.71e-16	1.75526		yes	yes
WBGene00015362	fbxa-105	C02H6.2	1.71e-07	1.75423		yes	yes
WBGene00020325	bath-46	T07H3.2	0.00101817	1.75213
WBGene00008295	nlp-39	C54C8.9	0.00067712	1.74683
WBGene00195026		F39E9.19	4.41e-12	1.74191
WBGene00008246		C50H2.13	3.82e-05	1.74087
WBGene00004002	pgp-8	T21E8.3	0.000347502	1.7399
WBGene00012783		Y43C5A.3	3.13e-10	1.73552		yes	yes
WBGene00002174	itx-1	W03D8.6	1.86e-21	1.73502
WBGene00014138	clec-186	ZK896.7	9.94e-38	1.72492
WBGene00021895	clec-84	Y54G2A.33	1.86e-26	1.7208
WBGene00001441	fkh-9	K03C7.2	1.04e-20	1.70859
WBGene00000216	asp-3	H22K11.1	6.65e-56	1.70646
WBGene00016190		C28G1.5	1.06e-13	1.6993
WBGene00018210		F39G3.5	2.33e-09	1.69871
WBGene00010723	cpg-7	K09E4.6	3.51e-06	1.6976
WBGene00010453	fozi-1	K01B6.1	9.73e-13	1.69646
WBGene00019682		K12H4.7	1.66e-42	1.69416
WBGene00019579	oac-57	K09E10.1	0.000161781	1.69293
WBGene00003689	nhr-99	M02H5.1	0.000220931	1.6928
WBGene00012810	nceh-1	Y43F8A.3	7.15e-07	1.69209
WBGene00003473	mtl-1	K11G9.6	0.000190801	1.68973		yes	yes
WBGene00006650	tts-1	F09E10.11	8.96e-07	1.68629
WBGene00000830	ctl-1	Y54G11A.6	0.00133217	1.68266
WBGene00015110		B0281.3	1.63e-09	1.68062
WBGene00005141	srd-64	Y22D7AR.8	0.000804165	1.67949
WBGene00022330	fbxa-80	Y82E9BL.14	0.000170091	1.67789		yes
WBGene00002016	hsp-16.2	Y46H3A.3	0.00217941	1.67426			yes
WBGene00021397		Y38C1AA.6	8.95e-06	1.67176
WBGene00013197	ttm-5	Y54E5A.1	3.61e-11	1.67121		yes
WBGene00001885	his-11	ZK131.5	9.58e-06	1.66631
WBGene00010150		F56D5.6	4.29e-11	1.66592
WBGene00021898		Y54G2A.36	2.2e-13	1.65964
WBGene00021495	sqst-2	Y40C5A.1	1.04e-08	1.6594
WBGene00023345		T12B5.9	0.00230582	1.65626
WBGene00012532	crp-1	Y32F6B.3	6.05e-09	1.65374			yes
WBGene00044280		W02A2.9	2.72e-05	1.6492
WBGene00022496	fbxa-92	Y119D3B.20	0.000316739	1.64901
WBGene00044396		ZK1290.14	8.5e-09	1.6481
WBGene00012624	fbxa-150	Y38H6C.11	5.32e-09	1.64719			yes
WBGene00001768	gst-20	Y48E1B.10	4.76e-10	1.64517
WBGene00002058	ifd-2	F25E2.4	1.07e-15	1.64429		yes	yes
WBGene00019780		M60.4	1.19e-19	1.64285
WBGene00003907	paf-2	C52B9.7	4.31e-09	1.63904
WBGene00004169	pqn-89	Y73B6BR.1	1.43e-11	1.63648
WBGene00008498		F01D5.8	0.000140532	1.62685
WBGene00044403	fbxa-219	Y54F10BM.15	0.00223849	1.6262
WBGene00018755	bcmo-2	F53C3.12	1.37e-07	1.62236
WBGene00022327	fbxa-15	Y82E9BL.11	0.00138564	1.622
WBGene00008372		D1054.5	5.77e-08	1.62103
WBGene00021197		Y17G9A.4	9.67e-07	1.61963
WBGene00044772		T23E7.6	0.00509109	1.61951
WBGene00015540	sams-4	C06E7.3	1.15e-06	1.6152
WBGene00021325		Y34B4A.9	6.7e-39	1.61513
WBGene00019373		K04A8.1	6.89e-11	1.61494
WBGene00019957		R08E3.1	1.67e-25	1.61466
WBGene00008167	acox-5	C48B4.1	7.81e-09	1.61257		yes
WBGene00010050		F54D5.4	6.49e-20	1.61222
WBGene00012947		Y47H9C.1	5.3e-05	1.60916
WBGene00015081		B0244.6	0.000106532	1.60836
WBGene00007866		C32H11.3	0.00154598	1.60556		yes	yes
WBGene00017434		F13H8.1	1.43e-05	1.60274
WBGene00020222	fut-6	T05A7.5	9.43e-07	1.60252
WBGene00004003	pgp-9	C47A10.1	8.8e-09	1.60074
WBGene00015767	hex-2	C14C11.3	8.01e-16	1.60061
WBGene00012201		W02B12.1	9.55e-12	1.59721
WBGene00012176		W01C9.2	0.00524639	1.59713
WBGene00003640	nhr-50	C06C6.5	1.44e-06	1.59639
WBGene00021167	cyp-32B1	Y5H2B.5	9.84e-06	1.59505		yes
WBGene00019744		M02H5.8	1.16e-12	1.5917
WBGene00020576		T19D12.1	7.4e-14	1.591
WBGene00022196	gpa-17	Y71H2B.7	3.35e-12	1.58466		yes
WBGene00003653	nhr-63	C06C6.4	4.03e-05	1.58434		yes
WBGene00013842	fbxa-34	ZC47.10	0.00303635	1.58413
WBGene00007453	fbxa-98	C08F11.5	0.000170532	1.58412
WBGene00010545	cbp-2	K03H1.10	5.7e-10	1.58365
WBGene00019068	faah-3	F58H7.2	2.23e-11	1.57769
WBGene00008091		C44F1.1	1.09e-07	1.57259			yes
WBGene00003648	nhr-58	R11G11.2	3.87e-05	1.57203
WBGene00017969		F32A5.3	1.65e-12	1.56506
WBGene00015295	acl-12	C01C10.3	5.33e-10	1.56158
WBGene00023252		C39H7.2	0.00152174	1.55963
WBGene00010522		K03A11.5	3.5e-05	1.55818
WBGene00010750		K10D11.6	4.27e-09	1.55768		yes	yes
WBGene00000981	dhs-18	C45B11.3	4.38e-09	1.55372		yes
WBGene00017416		F13B6.1	0.00235547	1.55306
WBGene00006923	vhp-1	F08B1.1	1.07e-26	1.55024
WBGene00021339		Y34F4.4	0.000239254	1.54415
WBGene00016719	math-24	C46F9.3	0.000829784	1.53966
WBGene00019214		H20E11.2	0.00498366	1.53856
WBGene00007599		C15A11.7	0.0008704	1.53771		yes	yes
WBGene00007807		C29F3.7	1.26e-10	1.53499		yes	yes
WBGene00009430		F35E12.6	5.15e-27	1.534		yes	yes
WBGene00008227		C50B8.5	0.000367756	1.5245
WBGene00001581	gfi-1	F57F4.3	0.00379009	1.52177
WBGene00012554		Y37D8A.16	4.89e-08	1.51438		yes	yes
WBGene00000991	dhs-28	M03A8.1	2.76e-21	1.51359		yes
WBGene00011856		T20D3.2	9.34e-37	1.51195
WBGene00022200	fard-1	Y71H10A.2	1.01e-14	1.51126
WBGene00004810	skr-4	Y60A3A.18	1.94e-08	1.51029
WBGene00013840	fbxa-151	ZC47.7	0.00504869	1.50912
WBGene00022331	fbxa-19	Y82E9BL.15	0.00419566	1.50513
WBGene00001577	gem-4	T12A7.1	6.57e-15	1.49919
WBGene00001500	ftn-1	C54F6.14	0.009055	1.49888
WBGene00019859		R03H10.7	0.00607116	1.49886
WBGene00021927	abhd-14	Y55F3AM.10	0.000163275	1.49885
WBGene00012140		T28F4.5	1.64e-27	1.49744
WBGene00021048		W05H9.1	2.33e-21	1.48958
WBGene00010047		F54D1.6	8.09e-19	1.48916
WBGene00044607		K02A11.4	0.00316946	1.48887
WBGene00017964		F31F7.1	0.000232508	1.48353
WBGene00019619	asp-14	K10C2.3	2.24e-12	1.48048		yes	yes
WBGene00002056	ifc-2	M6.1	3.86e-20	1.4786			yes
WBGene00020788	nep-22	T25B6.2	1.28e-07	1.47818
WBGene00006718	ubc-23	C28G1.1	0.000418797	1.47328
WBGene00007694		C23H4.6	2.47e-07	1.47252
WBGene00007748		C26E1.2	5.57e-05	1.47169
WBGene00021531		Y42G9A.1	3.73e-07	1.46736
WBGene00021260		Y22D7AR.6	7.67e-08	1.46629
WBGene00021371	nape-1	Y37E11AR.4	0.000324144	1.45923
WBGene00019967	cyp-33C8	R08F11.3	1.43e-07	1.45837		yes	yes
WBGene00008301	dct-3	C54D10.7	0.00598043	1.45715
WBGene00003524	nas-5	T23H4.3	0.00162375	1.45629
WBGene00235133		T26H5.14	0.00236923	1.45602
WBGene00010041		F54C9.3	5.3e-10	1.4513
WBGene00015046	nlp-34	B0213.17	0.00131552	1.45098
WBGene00015479	wht-1	C05D10.3	0.00318838	1.4505
WBGene00016883		C52E2.4	0.000819061	1.4482
WBGene00008493		F01D5.2	0.000209424	1.44669		yes
WBGene00022411		Y102A11A.1	0.00344751	1.44435
WBGene00015382		C03B1.14	0.000108126	1.44359
WBGene00019213		H20E11.1	0.00737597	1.44252
WBGene00219316		F21A3.11	8.94e-10	1.44032
WBGene00017226	fbxa-53	F07G6.7	0.0105233	1.43554		yes
WBGene00017727		F22H10.3	2.1e-24	1.43083
WBGene00015476		C05D9.9	8.08e-07	1.43034		yes
WBGene00004131	pqn-44	F55A12.9	5.78e-17	1.42911
WBGene00022645		ZK6.11	6.73e-32	1.42538
WBGene00016061	hpo-15	C24G6.6	0.000665839	1.42476
WBGene00017892		F28B4.3	0.00138328	1.42428
WBGene00020187	gsp-4	T03F1.5	0.0150942	1.42353
WBGene00008602	oac-14	F09B9.1	3.54e-05	1.42323		yes	yes
WBGene00004037	plc-2	Y75B12B.6	7.34e-08	1.42297			yes
WBGene00003607	nhr-8	F33D4.1	1.28e-13	1.42157
WBGene00006454	aex-4	T14G12.2	0.000324564	1.41574
WBGene00022083		Y69A2AR.12	0.00150442	1.41408
WBGene00007716	fbxa-82	C25D7.4	0.00609228	1.4123		yes
WBGene00010998		R03G8.3	6.09e-06	1.40907		yes
WBGene00001169	eef-1A.2	R03G5.1	3.95e-14	1.40767
WBGene00002234	kqt-2	M60.5	6.16e-09	1.40563
WBGene00017964		F31F7.1	2.09e-18	1.40496
WBGene00013968		ZK287.9	0.000105887	1.40387
WBGene00018354		F42G2.5	0.00760199	1.40025
WBGene00021796		Y52E8A.3	0.0136568	1.40013		yes	yes
WBGene00219770	linc-40	Y82E9BL.20	9.89e-05	1.40002
WBGene00194695		B0462.5	0.0115682	1.39788
WBGene00001501	ftn-2	D1037.3	2.03e-34	1.39691
WBGene00002054	ifb-2	F10C1.7	1.09e-14	1.39655
WBGene00020574		T19D7.6	0.0126641	1.39306
WBGene00010795		M01A8.1	0.000502807	1.3921
WBGene00017041		D2007.1	4.66e-06	1.39022
WBGene00020158		T02C5.1	5.03e-17	1.38345
WBGene00020080	math-37	R52.9	0.00246359	1.38322
WBGene00011596		T07G12.5	0.0153871	1.38287
WBGene00012970		Y48A6B.9	0.00116397	1.38158		yes
WBGene00011821	cdf-2	T18D3.3	0.000324144	1.37977
WBGene00017582		F18G5.6	9.24e-13	1.37884		yes
WBGene00019436		K06A9.2	0.00115148	1.37733
WBGene00011517	cgt-1	T06C12.10	0.00107028	1.37535
WBGene00021256		Y22D7AR.2	0.00246359	1.37514
WBGene00008101		C44H9.6	5.4e-06	1.37512
WBGene00004382	rnh-1.0	F59A6.6	1.66e-06	1.37472
WBGene00013227		Y56A3A.6	3.82e-10	1.37452
WBGene00010062	lipl-1	F54F3.3	0.000830429	1.37073
WBGene00019955		R08C7.12	7.79e-11	1.36989
WBGene00015122		B0302.5	3.57e-15	1.36856
WBGene00018398	sptl-2	F43H9.2	2.53e-11	1.36813
WBGene00012018		T25C12.3	1.79e-10	1.36745
WBGene00018237	drd-2	F40F4.6	5.56e-13	1.36546
WBGene00006467	magu-2	C01B7.4	6.3e-07	1.36248		yes	yes
WBGene00044469	clec-173	T26C12.6	1.3e-15	1.36231
WBGene00012280		W05E10.1	0.00188603	1.35787
WBGene00020504	svh-2	T14E8.1	1.59e-15	1.35733
WBGene00008309	nhr-170	C54E10.5	0.00756032	1.35381
WBGene00016407		C34D10.2	4e-22	1.35358
WBGene00010357		H03A11.2	2.03e-18	1.3517
WBGene00016119		C25H3.10	0.00178464	1.34968		yes
WBGene00018907		F55G1.15	0.00016175	1.3456
WBGene00016735	fhod-1	C46H11.11	7.2e-13	1.34517		yes
WBGene00022887		ZK1290.5	8.37e-05	1.34507
WBGene00018984		F56F10.1	1.02e-14	1.34454
WBGene00017487		F15E6.6	1.67e-06	1.34141
WBGene00005649	srp-8	F20D6.3	0.0127203	1.34081
WBGene00018260	cyp-33C7	F41B5.2	0.000265712	1.34
WBGene00016005	ift-74	C18H9.8	0.00874165	1.33542
WBGene00019327	zip-2	K02F3.4	3.71e-29	1.33388
WBGene00015956		C18B2.5	1.2e-23	1.33229
WBGene00008692	scav-4	F11C1.3	3.98e-05	1.3305
WBGene00023021		F32A5.9	0.00167855	1.32758
WBGene00011073		R07A4.2	0.00224056	1.3268
WBGene00013643		Y105C5A.24	9.59e-08	1.32375
WBGene00011979		T24B8.5	1.5e-14	1.32224
WBGene00000238	bar-1	C54D1.6	2.01e-08	1.32054
WBGene00010597		K06A4.7	5.54e-24	1.32042
WBGene00019351	lron-7	K03A1.2	1.35e-16	1.3198
WBGene00011978		T24B8.4	3.72e-14	1.31658
WBGene00001917	his-43	F08G2.2	0.0210658	1.31574
WBGene00001886	his-12	ZK131.6	0.0210658	1.31574
WBGene00016282		C31B8.7	0.000982205	1.31511
WBGene00017398	slc-17.6	F12B6.2	0.0264228	1.31501
WBGene00045404		C06C3.11	0.0153007	1.31487
WBGene00013541		Y75B8A.4	2e-05	1.31227		yes
WBGene00007550		C13C4.6	0.00499154	1.31097
WBGene00009796		F46G10.1	5.01e-15	1.30908
WBGene00013009	fbxc-23	Y48E1B.11	0.0176722	1.30896
WBGene00000831	ctl-2	Y54G11A.5	2.24e-14	1.30879
WBGene00008149	pyp-1	C47E12.4	1.78e-17	1.30862
WBGene00012013	ugt-54	T25B9.7	0.000269274	1.30515		yes	yes
WBGene00012819		Y43F8B.9	0.0010651	1.30255
WBGene00004405	rop-1	C12D8.11	1.65e-16	1.30134
WBGene00017001		D1007.3	0.016168	1.30045
WBGene00017971		F32A5.8	2.78e-06	1.30007
WBGene00016104	ddr-1	C25F6.4	2.55e-05	1.29984
WBGene00002263	lea-1	K08H10.1	2.83e-25	1.29777
WBGene00016809		C50D2.6	3.1e-05	1.29537
WBGene00003097	lys-8	C17G10.5	1.73e-16	1.29436
WBGene00006798	unc-64	F56A8.7	7.13e-11	1.2926
WBGene00000412	cdr-1	F35E8.11	0.00874165	1.29152		yes	yes
WBGene00017592		F19C7.2	0.0105993	1.28895
WBGene00022307		Y77E11A.2	3.98e-09	1.28638
WBGene00001795	gtl-1	C05C12.3	1.95e-06	1.28185
WBGene00015955		C18B2.4	3.09e-16	1.27513
WBGene00015085		B0244.10	0.000392646	1.27388
WBGene00001476	fmo-1	K08C7.2	1.34e-05	1.27364
WBGene00003617	nhr-18	F44C8.3	0.00649485	1.2716
WBGene00007180		B0457.6	3.6e-07	1.27119
WBGene00021503	ctsa-2	Y40D12A.2	3.64e-07	1.27107		yes	yes
WBGene00000562	cng-1	F14H8.6	0.0256337	1.26582
WBGene00019645	swt-7	K11D12.5	9.94e-15	1.26574		yes	yes
WBGene00017840	ttm-2	F26G1.4	2.34e-06	1.26551
WBGene00044672	fbxa-4	F42G2.8	0.00170713	1.2653
WBGene00009434		F35E12.10	1.73e-21	1.26517
WBGene00003957	pcp-2	F23B2.12	4.9e-08	1.265
WBGene00021487	comt-3	Y40B10A.2	0.000242916	1.26409
WBGene00008644		F10C2.3	0.000188996	1.2633
WBGene00013763		Y113G7B.14	9.21e-05	1.26228
WBGene00044723		K11H12.11	0.0227124	1.26137
WBGene00008831		F14H3.12	0.00197275	1.26127		yes
WBGene00004172	pqn-92	Y75B8A.27	1.46e-12	1.25995
WBGene00013730	sql-1	Y111B2A.4	1.75e-05	1.25916
WBGene00021834	mab-31	Y54E10A.16	2.33e-11	1.25898
WBGene00015965	ugt-48	C18C4.3	2.23e-05	1.25793
WBGene00010116		F55F3.2	8.26e-05	1.25756
WBGene00044776		T02B11.8	0.0112341	1.25533
WBGene00002990	lin-1	C37F5.1	5.99e-10	1.25499
WBGene00002272	lec-9	C16H3.2	1.67e-28	1.25382
WBGene00015107		B0280.13	5.66e-06	1.25214
WBGene00016585	oac-59	C42C1.7	0.000103266	1.2487
WBGene00000218	asp-5	F21F8.3	7.93e-26	1.24629
WBGene00000480	cgp-1	Y38C9A.2	7.01e-13	1.24454
WBGene00017448		F14B8.6	1.67e-09	1.24444
WBGene00005657	srr-6	C13D9.1	0.0315153	1.24286		yes	yes
WBGene00017773	dct-6	F25B5.1	1.17e-12	1.24238
WBGene00001523	gbh-2	M05D6.7	4.8e-05	1.24203		yes	yes
WBGene00016958	ilys-4	C55F2.2	0.00650857	1.24095			yes
WBGene00000088	aex-5	F32A7.6	5.4e-06	1.24058
WBGene00008945		F19B2.6	0.00112223	1.24006
WBGene00000298	cat-4	F32G8.6	0.0173613	1.23803		yes
WBGene00009102		F25B3.5	0.0119502	1.23712
WBGene00006372	syx-2	F48F7.2	5.3e-07	1.23556
WBGene00016716	acs-17	C46F4.2	3.8e-06	1.23481
WBGene00019300	swt-1	K02D7.5	0.000162437	1.23431
WBGene00017048		D2021.4	0.019325	1.2307		yes
WBGene00006272	str-245	F32A7.7	0.0349729	1.22989
WBGene00017443		F13H8.11	6.72e-05	1.22888
WBGene00022346		Y82E9BR.13	0.00919074	1.22858
WBGene00012005	jun-1	T24H10.7	1.2e-12	1.22482
WBGene00016191		C28G1.6	0.00293551	1.22446
WBGene00001644	gly-19	F22D6.12	0.00647503	1.2233
WBGene00022735		ZK418.6	0.0134994	1.22182
WBGene00017687	ets-4	F22A3.1	1.25e-10	1.22021
WBGene00015791		C15C7.5	8.95e-09	1.21773
WBGene00001753	gst-5	R03D7.6	6.79e-06	1.21615		yes	yes
WBGene00018351		F42G2.2	0.00127659	1.21609
WBGene00010540		K03H1.5	1.08e-06	1.2133
WBGene00044488		Y54G2A.45	9.67e-07	1.20879
WBGene00206380		C42D4.18	0.00803032	1.20879
WBGene00017335		F10D2.10	0.00259877	1.20849
WBGene00018803	fbxa-24	F54D10.2	0.0242953	1.20777
WBGene00017258		F08F1.4	0.0161551	1.20717
WBGene00021044		W05H7.1	1.33e-07	1.20266
WBGene00013898		ZC443.3	1.66e-07	1.20208		yes	yes
WBGene00009259	hpo-34	F29G6.3	5.25e-06	1.20125
WBGene00008490		F01D4.8	0.0419048	1.20095
WBGene00019166	tat-2	H06H21.10	1.18e-05	1.20092
WBGene00185092		K08D8.7	0.0352116	1.20073
WBGene00001210	egl-46	K11G9.4	3.2e-06	1.19759
WBGene00003518	nac-2	R107.1	2.26e-05	1.19657
WBGene00007680	maa-1	C18D11.2	0.000185999	1.19609
WBGene00013755	fbxa-115	Y113G7B.3	0.00388688	1.19482
WBGene00019017		F57F4.4	0.00488915	1.1929
WBGene00003941	pbo-1	Y71H2AL.1	1.91e-09	1.19269
WBGene00007365		C06B3.6	0.031407	1.19146
WBGene00001157	ech-8	F01G10.2	1.47e-05	1.1874		yes
WBGene00016599		C42D8.1	0.0019631	1.18668
WBGene00018730		F53A9.7	0.00478401	1.18391
WBGene00044977		F56C4.4	0.0557959	1.18323
WBGene00011429		T04C12.7	0.0320527	1.18321
WBGene00018044		F35D11.3	4.24e-07	1.18074
WBGene00007726		C25F9.6	0.0628131	1.17843		yes
WBGene00009663	hda-5	F43G6.11	5.01e-05	1.17751
WBGene00022324	fbxa-26	Y82E9BL.7	0.042946	1.1775
WBGene00020188		T03F1.6	3e-05	1.17661
WBGene00012127		T28D6.7	0.00017818	1.17644
WBGene00019298		K02D7.1	5.84e-17	1.17616
WBGene00010774		K11E4.2	0.0261237	1.17611
WBGene00003980	pes-7	F09C3.1	4.18e-11	1.17609
WBGene00018594	aman-3	F48C1.1	7.67e-05	1.17592
WBGene00007421		C07H4.1	0.0173353	1.17543
WBGene00007593		C14H10.3	3.61e-11	1.17444
WBGene00012548		Y37D8A.6	2.94e-06	1.1737			yes
WBGene00022181	pho-9	Y71H2AM.16	0.00107881	1.1725
WBGene00001208	egl-44	F28B12.2	6.39e-11	1.17125
WBGene00011798		T16G1.4	0.0435821	1.17055
WBGene00001250	elt-2	C33D3.1	8.5e-06	1.16847
WBGene00012494	nhr-232	Y22F5A.1	0.00177446	1.16639
WBGene00000020	abt-2	F12B6.1	1.06e-08	1.16624
WBGene00016647	fbxc-4	C44C8.2	0.0131144	1.16597
WBGene00016648	fbxc-2	C44C8.3	0.0131144	1.16597
WBGene00019073	fbxc-3	F58H7.8	0.0131144	1.16597
WBGene00018704	ztf-13	F52E4.8	9.29e-10	1.16577
WBGene00012444		Y15E3A.5	3.43e-08	1.16342
WBGene00002057	ifd-1	R04E5.10	6.99e-05	1.16146
WBGene00017667	ttr-37	F21E9.3	0.000126856	1.16071		yes	yes
WBGene00015455		C04G6.5	0.0680355	1.15968		yes	yes
WBGene00000208	asc-1	Y53F4B.15	6.36e-10	1.15965
WBGene00022644	dod-19	ZK6.10	1.19e-21	1.15953
WBGene00001150	ech-1.1	C29F3.1	0.00318838	1.15809
WBGene00043050	oig-4	R07G3.9	0.0574951	1.15731
WBGene00045461		C25F9.14	0.0118523	1.15474
WBGene00008213		C49F8.1	0.0134743	1.15435
WBGene00016335	gba-1	C33C12.3	1.87e-06	1.15149
WBGene00015220		B0507.3	0.00162375	1.15049
WBGene00009403		F35C11.4	0.000219786	1.14931
WBGene00018274		F41C3.8	0.00798542	1.1476
WBGene00022572		ZC239.14	0.0654024	1.14662
WBGene00018374	tag-343	F43B10.2	4.3e-07	1.14473
WBGene00018540	btb-21	F47C10.2	0.0595855	1.14185
WBGene00011725	lips-5	T12A7.4	0.00351253	1.14064
WBGene00013513		Y71A12C.2	0.0233747	1.14006
WBGene00018145		F37C4.5	3.37e-23	1.13955
WBGene00002217	klp-4	F56E3.3	8.57e-10	1.13865
WBGene00003670	nhr-80	H10E21.3	1.99e-05	1.13864
WBGene00018566		F47E1.2	0.0080481	1.13615
WBGene00020799		T25D10.1	0.00153206	1.13568
WBGene00017771		F25B4.8	0.000102304	1.1345
WBGene00044743	crb-3	C35B8.4	0.0019493	1.13298
WBGene00003735	nhx-8	Y18D10A.6	6.13e-11	1.13255
WBGene00006971	zak-1	R13F6.6	0.000878333	1.13181
WBGene00004898	snb-2	F23H12.1	1.3e-06	1.13099
WBGene00001184	egl-15	F58A3.2	0.000112099	1.12921
WBGene00001559	gei-1	F45H7.2	9.2e-09	1.12911
WBGene00010334	del-5	F59F3.4	0.00475711	1.12755
WBGene00013118		Y51H4A.24	1.82e-05	1.12692
WBGene00011462	vap-2	T05A10.5	0.0365289	1.12684
WBGene00009192		F27E5.1	1.34e-09	1.1236
WBGene00008748	yap-1	F13E6.4	9.8e-11	1.12271		yes
WBGene00012407		Y7A5A.1	5.39e-11	1.12034
WBGene00008100		C44H9.5	0.000109767	1.11931
WBGene00002039	hum-6	T10H10.1	2.4e-06	1.11894
WBGene00013189		Y54E2A.4	5.21e-10	1.11877
WBGene00009165	gpx-1	F26E4.12	0.000134852	1.11799		yes
WBGene00021885		Y54G2A.20	0.0434922	1.11779
WBGene00008099		C44H9.4	0.00324531	1.11575
WBGene00195016		ZC155.8	0.0846988	1.11418
WBGene00008389		D1086.2	0.0697394	1.11389
WBGene00045379		C45B11.6	0.0120953	1.11321
WBGene00020784	tat-4	T24H7.5	0.000177319	1.11318			yes
WBGene00013882	msa-1	ZC410.5	0.012194	1.11266
WBGene00022893		ZK1290.13	0.000588055	1.11166
WBGene00001772	gst-24	F37B1.1	0.00853066	1.11164
WBGene00020449	fbxa-54	T12B5.2	0.0084446	1.1112
WBGene00220023		K11C4.14	0.0669626	1.10985
WBGene00000190	arf-1.1	F45E4.1	0.0724274	1.10971
WBGene00015913		C17F4.7	9.33e-15	1.10856
WBGene00018346		F42C5.4	0.0458533	1.10752
WBGene00004858	sma-4	R12B2.1	1.04e-07	1.1074
WBGene00010752		K10G4.3	0.0643746	1.10723		yes
WBGene00013947		ZK228.4	5.71e-07	1.10712
WBGene00007525		C11G10.1	0.0276658	1.1068
WBGene00015522		C06E1.7	0.0168701	1.10548
WBGene00010769	asah-1	K11D2.2	4.45e-13	1.10381
WBGene00007336		C05C12.4	5.34e-06	1.10371
WBGene00020453	fbxa-55	T12B5.6	0.012495	1.10058
WBGene00004622	rrn-3.1	F31C3.9	0.0834473	1.10029
WBGene00019493	catp-5	K07E3.7	0.000203163	1.09971
WBGene00013379		Y62E10A.13	0.048672	1.09845
WBGene00014152		ZK930.2	1.33e-05	1.09729
WBGene00010503		K02C4.5	2.17e-06	1.09646
WBGene00023432		K12B6.9	0.00801547	1.0958
WBGene00002146	ipp-5	C09B8.1	8.73e-06	1.09572
WBGene00019014		F57C12.2	0.00624363	1.09432
WBGene00000789	cpz-2	M04G12.2	6.89e-08	1.09361
WBGene00002038	hum-5	T02C12.1	2.77e-14	1.09327
WBGene00016260		C30F12.1	7.03e-09	1.09281
WBGene00021322		Y34B4A.6	2.57e-15	1.09263
WBGene00003593	nfm-1	F42A10.2	6.49e-09	1.09008
WBGene00016611	bicd-1	C43G2.2	8.83e-07	1.08916
WBGene00012085		T27D12.1	4.63e-12	1.08783
WBGene00006575	tir-1	F13B10.1	4.48e-10	1.08779
WBGene00018384		F43C11.7	0.00318838	1.08693
WBGene00020363	fbxa-3	T08E11.7	0.0806392	1.0862
WBGene00017478		F15A8.6	0.00142511	1.08563
WBGene00003968	peb-1	T14F9.4	5.29e-05	1.08458
WBGene00022333	fbxa-27	Y82E9BL.17	0.0692342	1.08379
WBGene00043983		C39D10.11	0.00588664	1.08279
WBGene00022413		Y102A11A.3	1.53e-05	1.08261
WBGene00003659	nhr-69	T23H4.2	1.41e-06	1.08244
WBGene00003767	nlp-29	B0213.4	0.0104186	1.08226
WBGene00009842	igeg-2	F48C5.1	0.0312946	1.08221
WBGene00001132	alp-1	T11B7.4	9.35e-08	1.08164
WBGene00010328		F59C6.11	0.0409023	1.08103		yes	yes
WBGene00021340		Y34F4.5	8.53e-08	1.07946
WBGene00022484	fbxa-77	Y119D3B.6	0.0112538	1.07878
WBGene00018216		F40A3.1	2.24e-06	1.07717
WBGene00018153		F37C12.10	0.0685006	1.07697
WBGene00003978	pes-4	Y119D3B.17	3.11e-07	1.07583
WBGene00007857		C31H5.6	2.66e-05	1.07454
WBGene00004030	pin-2	F07C6.1	0.0275478	1.07071
WBGene00016555	math-20	C40D2.2	0.00577547	1.07047
WBGene00016866	coel-1	C52B9.3	3.08e-05	1.0698
WBGene00017060		D2063.1	0.0500902	1.0696		yes
WBGene00000084	aex-1	D2030.10	0.000195869	1.06932
WBGene00000150	apm-1	F55A12.7	2.22e-09	1.06881
WBGene00015538	sams-3	C06E7.1	0.00142358	1.06847
WBGene00004677	rrn-3.56	F31C3.10	0.0890748	1.06807
WBGene00019411		K05F1.10	0.00114904	1.06753		yes	yes
WBGene00021858		Y54F10BM.3	0.0627486	1.06526
WBGene00007840		C31C9.6	0.000752211	1.06507
WBGene00045212		Y110A7A.21	0.0193984	1.06418
WBGene00003903	pab-2	F18H3.3	2.65e-08	1.06292
WBGene00007347		C05G5.1	0.00385459	1.06226
WBGene00017327		F10C1.8	0.0570942	1.06174
WBGene00006051	ssq-2	T28H11.5	0.0832767	1.06132
WBGene00017012	acs-22	D1009.1	2.82e-08	1.0596
WBGene00017080	lec-12	DC2.3	4.2e-10	1.05934
WBGene00004857	sma-3	R13F6.9	0.000171152	1.0581
WBGene00001761	gst-13	T26C5.1	0.000120587	1.05627		yes
WBGene00010336		F59F4.1	0.00238295	1.05616
WBGene00021997		Y59E9AR.1	0.0442751	1.0555
WBGene00019978	hacd-1	R09B5.6	3.01e-11	1.05294		yes	yes
WBGene00000103	akt-2	F28H6.1	0.000101343	1.05192
WBGene00004778	ser-3	K02F2.6	0.00118882	1.04986
WBGene00003959	pcp-4	Y116F11B.3	1.01e-05	1.04964
WBGene00019743	nhr-203	M02H5.5	0.00617598	1.04946
WBGene00013037		Y49E10.18	1.38e-07	1.04891
WBGene00045397		Y54G2A.52	0.00577495	1.04841
WBGene00017447		F14B8.5	9.47e-06	1.04837
WBGene00010086		F55B11.4	5.79e-08	1.04487
WBGene00001591	glc-1	F11A5.10	5.19e-05	1.04463		yes	yes
WBGene00018860		F55A4.8	0.00042449	1.04332
WBGene00020153	nhr-212	T01G6.6	0.0388798	1.04285
WBGene00003645	nhr-55	T01G6.7	0.0104885	1.04259
WBGene00044418		C08G5.7	0.011069	1.04119
WBGene00016894		C53B7.3	2.49e-10	1.04011
WBGene00019115	nhr-195	F59E11.10	0.0781488	1.03975
WBGene00011978		T24B8.4	0.00158931	1.03862
WBGene00017786		F25E5.5	0.0012327	1.03839
WBGene00010049		F54D5.3	5.56e-13	1.0379
WBGene00003377	mls-2	C39E6.4	0.0122276	1.03787
WBGene00015561		C07A12.7	3.88e-07	1.03734
WBGene00017310		F09G2.1	0.000261358	1.03663
WBGene00014000		ZK550.6	1.91e-07	1.03613		yes
WBGene00016269		C30G4.4	0.000237695	1.03586
WBGene00044696		F52E1.14	1.35e-11	1.03511
WBGene00018033		F35B3.7	0.0347305	1.03482
WBGene00020662		T21H3.1	2.13e-17	1.0315
WBGene00006926	vit-2	C42D8.2	1.14e-06	1.03044
WBGene00009888		F49E2.5	3.99e-13	1.02956
WBGene00019617		K10C2.1	1.69e-05	1.02888
WBGene00016663		C45E1.4	0.00567235	1.02838
WBGene00003564	ncs-2	F10G8.5	8e-13	1.02774
WBGene00013480	egas-3	Y69H2.2	0.0581285	1.02501
WBGene00010340	slcf-1	F59F5.1	0.00598043	1.02447
WBGene00003766	nlp-28	B0213.3	0.00925266	1.02243		yes
WBGene00044792		F59C6.14	0.0577691	1.0217
WBGene00004198	prx-13	F32A5.6	0.00102141	1.02132
WBGene00000007	aat-6	T11F9.4	0.00607758	1.02018
WBGene00000963	dhp-1	R06C7.3	0.000839045	1.0201
WBGene00007481		C09F9.4	0.00402658	1.01928
WBGene00001345	fos-1	F29G9.4	1.56e-06	1.01809
WBGene00019477		K07C11.4	1.25e-05	1.01713
WBGene00011850		T20B3.1	0.000304979	1.01678		yes
WBGene00021872	clec-85	Y54G2A.6	4.02e-06	1.0155
WBGene00005643	srp-2	C05E4.1	0.000395228	1.01392
WBGene00016768	cyp-33E1	C49C8.4	0.0138328	1.01368
WBGene00020840	spch-3	T27A3.4	0.0650922	1.01306
WBGene00017304		F09F7.7	6.41e-05	1.01174
WBGene00011984		T24C2.5	0.0215174	1.011
WBGene00008494		F01D5.3	0.0366982	1.01058
WBGene00007308		C04G2.9	0.0793003	1.00989
WBGene00016134		C26B9.5	9.95e-09	1.00873
WBGene00012134		T28F3.8	4.4e-07	1.00809
WBGene00003997	pgp-3	ZK455.7	0.000105802	1.00737
WBGene00017306		F09F9.1	0.0464669	1.00703
WBGene00012306		W06F12.2	2.68e-05	1.00627
WBGene00001828	hch-1	F40E10.1	0.000323761	1.00572
WBGene00014134		ZK896.3	0.0409023	1.00544
WBGene00022161		Y71G12B.26	0.0617989	1.00538
WBGene00001099	dsc-4	K02D7.4	1.2e-10	1.00533
WBGene00004859	sma-5	W06B3.2	7.11e-06	1.00532
WBGene00015680	egal-1	C10G6.1	4.01e-05	1.00215
WBGene00019599		K09H11.1	0.000879742	1.00156		yes
WBGene00002137	inx-15	R12E2.9	4.87e-05	1.0009
WBGene00011093		R07B7.9	0.0189548	1.00062

## Sheet: sams UP PA14
wormbase_id	geane_name	sequence	padj	log2FoldChange
WBGene00018760	irg-3	F53E10.4	2.64e-51	4.79667
WBGene00004001	pgp-7	T21E8.2	1.02e-44	4.54921
WBGene00018708	oac-32	F52F10.4	3.63e-32	4.1015
WBGene00003999	pgp-5	C05A9.1	1.79e-46	4.05587
WBGene00020760		T24C4.4	8.59e-45	3.99166
WBGene00015574	irg-1	C07G3.2	9.18e-33	3.696
WBGene00014771		F55G11.3	8.51e-19	3.42405
WBGene00007366		C06B3.7	1.29e-25	3.36452
WBGene00008493		F01D5.2	5.19e-19	3.28874
WBGene00011330		T01D3.6	5.91e-30	3.21614
WBGene00007872		C32H11.9	2.2e-19	3.13396
WBGene00003473	mtl-1	K11G9.6	5.53e-15	3.05881
WBGene00007097		B0024.4	3.42e-18	3.04375
WBGene00044206		T26H5.9	6.53e-23	2.97987
WBGene00009914		F49H6.13	1.81e-12	2.97818
WBGene00011799		T16G1.5	4.37e-15	2.92585
WBGene00007867		C32H11.4	7.74e-13	2.92194
WBGene00010128		F55G11.8	2.76e-15	2.84788
WBGene00011494		T05F1.9	1.54e-12	2.79613
WBGene00010124		F55G11.4	7.46e-16	2.74855
WBGene00018725	kreg-1	F53A9.2	4.33e-16	2.72306
WBGene00010123		F55G11.2	3.34e-11	2.70545
WBGene00007195		B0513.2	5.33e-10	2.69155
WBGene00012451		Y17D7B.3	2.06e-10	2.66345
WBGene00007873	dod-21	C32H11.10	3.18e-11	2.58616
WBGene00016577	clec-3	C41H7.7	4.11e-15	2.56841
WBGene00021464	ugt-31	Y39G10AR.6	1.06e-12	2.56605
WBGene00012923	fbxa-128	Y47D3A.2	6.84e-12	2.45307
WBGene00001786	gst-38	F35E8.8	1.42e-11	2.45196
WBGene00021585	clec-74	Y46C8AL.8	2.65e-09	2.43535
WBGene00020747		T24A6.7	3.78e-08	2.39282
WBGene00015932		C17H12.6	2.2e-12	2.38375
WBGene00008494		F01D5.3	7.49e-09	2.35029
WBGene00009428		F35E12.4	4.32e-10	2.34596
WBGene00010899		M28.8	2.05e-11	2.31787
WBGene00008492		F01D5.1	5.08e-12	2.27658
WBGene00017467		F14F9.4	7.87e-12	2.24552
WBGene00018729		F53A9.6	1.24e-12	2.24506
WBGene00009895	scl-2	F49E11.10	4.5e-10	2.22117
WBGene00001500	ftn-1	C54F6.14	1.72e-08	2.19505
WBGene00001754	gst-6	F11G11.3	8.37e-10	2.19263
WBGene00009433		F35E12.9	2.68e-11	2.18388
WBGene00009397	clec-66	F35C5.9	6.3e-09	2.17737
WBGene00020579		T19D12.4	1.82e-14	2.17614
WBGene00010125	dod-22	F55G11.5	7.22e-09	2.16893
WBGene00004052	parg-2	H23L24.5	6.81e-10	2.16257
WBGene00012450		Y17D7B.2	3.4e-06	2.10688
WBGene00016783	irg-2	C49G7.5	1.33e-08	2.10005
WBGene00010745	dod-17	K10D11.1	9.75e-07	2.09247
WBGene00010019		F54B8.4	5.31e-08	2.06968
WBGene00007875	dod-24	C32H11.12	2.14e-06	2.05635
WBGene00007228	acs-7	C01G6.7	3.99e-08	2.05619
WBGene00007866		C32H11.3	7.3e-06	2.04895
WBGene00009433		F35E12.9	7.96e-11	2.03876
WBGene00004000	pgp-6	T21E8.1	5.2e-10	2.03015
WBGene00008988		F20G2.5	7.89e-07	2.02434
WBGene00019660		K11H12.4	2.29e-07	2.01622
WBGene00015759		C14C6.5	9.28e-10	2.01337
WBGene00013900	ugt-18	ZC443.5	3.4e-06	2.01213
WBGene00016845		C50F7.5	1.15e-08	2.01085
WBGene00007833	oac-6	C31A11.5	3.03e-06	1.96383
WBGene00014063	clec-143	ZK673.9	3.02e-05	1.95495
WBGene00018971	clec-67	F56D6.2	4.13e-09	1.94427
WBGene00021580	clec-174	Y46C8AL.2	4.82e-08	1.93987
WBGene00018970	clec-68	F56D6.1	4.36e-05	1.93335
WBGene00012583	clec-4	Y38E10A.5	2.71e-05	1.92304
WBGene00017660		F21C10.11	1.98e-06	1.89205
WBGene00001817	haf-7	Y50E8A.16	3.28e-09	1.8903
WBGene00017764		F25A2.1	1.12e-07	1.88269
WBGene00007864		C32H11.1	5.97e-05	1.87397
WBGene00019215		H20E11.3	1.99e-05	1.82303
WBGene00000795	crn-2	CD4.2	4.68e-07	1.80686
WBGene00019273		H43E16.1	2.02e-08	1.7702
WBGene00011725	lips-5	T12A7.4	1.43e-05	1.76914
WBGene00018724		F53A9.1	1.77e-07	1.76812
WBGene00007153	clec-41	B0365.6	2.18e-08	1.7675
WBGene00001761	gst-13	T26C5.1	4.21e-06	1.75765
WBGene00008476		E03H4.8	2.18e-06	1.7531
WBGene00013654		Y105C5B.15	1.04e-07	1.74818
WBGene00018707	oac-31	F52F10.3	7.46e-05	1.74535
WBGene00000783	cpr-3	T10H4.12	3.98e-08	1.73933
WBGene00014135		ZK896.4	1.63e-06	1.7342
WBGene00018874	tag-234	F55C12.7	8.15e-06	1.73131
WBGene00009432	cld-9	F35E12.8	4.96e-06	1.72757
WBGene00008584		F08G5.6	5.64e-06	1.71208
WBGene00003090	lys-1	Y22F5A.4	6.67e-06	1.69401
WBGene00007717		C25D7.5	1.41e-07	1.69168
WBGene00006650	tts-1	F09E10.11	1.74e-08	1.67816
WBGene00021590		Y46D2A.2	3.18e-06	1.66683
WBGene00010062	lipl-1	F54F3.3	0.000239134	1.66476
WBGene00008900		F16H6.10	1.01e-06	1.64841
WBGene00008495		F01D5.5	4.83e-05	1.63384
WBGene00235133		T26H5.14	0.00148138	1.62423
WBGene00077593		C49G7.12	1.93e-06	1.62306
WBGene00009488	oac-20	F36G9.12	0.00132997	1.61487
WBGene00011979		T24B8.5	0.00142674	1.61212
WBGene00019435		K06A9.1	1.01e-06	1.59512
WBGene00013075		Y51A2D.7	0.00128225	1.59098
WBGene00019738	clec-265	M02F4.7	4.23e-05	1.57211
WBGene00000841	cul-6	K08E7.7	0.000475827	1.57043
WBGene00019619	asp-14	K10C2.3	0.00110988	1.5659
WBGene00021236	pud-1.2	Y19D10B.7	0.00195547	1.54722
WBGene00021796		Y52E8A.3	0.00171503	1.53638
WBGene00011699	cyp-34A2	T10H4.11	0.00314903	1.52844
WBGene00016865	ets-9	C52B9.2	1.62e-05	1.51859
WBGene00014000		ZK550.6	5.88e-06	1.51451
WBGene00012518	comt-2	Y32B12A.3	0.0038229	1.49874
WBGene00021517		Y41D4B.15	0.00378018	1.49095
WBGene00012101	zip-10	T27F2.4	0.000305742	1.48697
WBGene00021879	clec-83	Y54G2A.14	0.000185054	1.48249
WBGene00009724		F45D3.4	6.41e-05	1.47507
WBGene00021167	cyp-32B1	Y5H2B.5	0.00295582	1.45433
WBGene00011803		T16G12.1	0.0024829	1.44505
WBGene00019547		K09C4.1	0.00921853	1.44271
WBGene00013996		ZK550.2	0.00188908	1.44143
WBGene00003957	pcp-2	F23B2.12	0.00204991	1.4373
WBGene00007414		C07E3.3	0.000538695	1.4326
WBGene00010660		K08D8.6	5.25e-06	1.43188
WBGene00018731		F53A9.8	0.000517469	1.42498
WBGene00044681		T24C4.8	0.00858791	1.41974
WBGene00016424		C34H4.1	0.000248434	1.41394
WBGene00003097	lys-8	C17G10.5	0.000274608	1.41387
WBGene00008301	dct-3	C54D10.7	0.0121643	1.41017
WBGene00018939	fbxa-190	F56C3.2	0.0091677	1.40678
WBGene00006467	magu-2	C01B7.4	0.000287721	1.39807
WBGene00020080	math-37	R52.9	0.0133233	1.3967
WBGene00003778	nnt-1	C15H9.1	0.00921853	1.38725
WBGene00016052	dod-3	C24B9.9	0.0111978	1.38624
WBGene00009226	cyp-37B1	F28G4.1	0.0156262	1.3745
WBGene00015198	clec-2	B0454.7	0.0169893	1.37327
WBGene00021518	hpo-6	Y41D4B.16	1.86e-05	1.37112
WBGene00014251	gstk-1	ZK1320.1	0.000316079	1.36527
WBGene00015859		C16D9.4	0.000527512	1.36295
WBGene00003091	lys-2	Y22F5A.5	0.000807134	1.3604
WBGene00006627	tsp-1	C02F5.8	0.00732556	1.35725
WBGene00004987	spp-2	T08A9.12	0.00241953	1.35116
WBGene00014136		ZK896.5	0.00487242	1.3507
WBGene00000830	ctl-1	Y54G11A.6	0.00011647	1.34868
WBGene00019644	cpt-4	K11D12.4	0.00732556	1.34699
WBGene00008105		C45B11.2	0.00721523	1.34255
WBGene00001476	fmo-1	K08C7.2	0.00223937	1.33937
WBGene00009431	dct-17	F35E12.7	0.000526809	1.33864
WBGene00016061	hpo-15	C24G6.6	0.00814916	1.33591
WBGene00000480	cgp-1	Y38C9A.2	0.00040847	1.33301
WBGene00012824		Y43F8B.14	0.0153802	1.33221
WBGene00195026		F39E9.19	0.00240903	1.32864
WBGene00022597		ZC395.5	0.0232809	1.32141
WBGene00010769	asah-1	K11D2.2	0.00314962	1.31487
WBGene00008599		F09A5.2	0.00161865	1.31341
WBGene00008602	oac-14	F09B9.1	0.00921853	1.31215
WBGene00012027	fbxa-127	T25E12.12	0.0243486	1.306
WBGene00008486	ugt-44	F01D4.2	6.71e-05	1.30496
WBGene00020801		T25D10.4	0.000864223	1.30198
WBGene00017199	clec-45	F07C4.2	0.0229739	1.29886
WBGene00021262	fbxa-74	Y22D7AR.9	0.0024829	1.29872
WBGene00010750		K10D11.6	0.0016721	1.29788
WBGene00011850		T20B3.1	0.00921853	1.29787
WBGene00019659		K11H12.3	0.0140623	1.29612
WBGene00018601		F48C1.9	0.0173748	1.29528
WBGene00009429		F35E12.5	9.11e-05	1.29137
WBGene00009430		F35E12.6	0.000307028	1.28953
WBGene00019779		M60.2	0.000630562	1.28748
WBGene00019564		K09D9.1	0.00938728	1.27859
WBGene00000831	ctl-2	Y54G11A.5	0.000141901	1.27542
WBGene00010684		K08F9.1	0.0333698	1.2674
WBGene00010998		R03G8.3	0.00501093	1.26544
WBGene00008886		F16C3.2	0.00685298	1.26422
WBGene00013146		Y53C12B.7	0.0218734	1.24944
WBGene00022891		ZK1290.10	0.011571	1.24788
WBGene00008425		D2045.8	0.00728276	1.24753
WBGene00015079		B0244.4	0.051509	1.23002
WBGene00001591	glc-1	F11A5.10	0.00561075	1.22933
WBGene00007599		C15A11.7	0.0487142	1.22761
WBGene00006649	tth-1	F08F1.8	0.0101793	1.22158
WBGene00011182		R09H10.5	0.0210297	1.21831
WBGene00000298	cat-4	F32G8.6	0.00327485	1.21711
WBGene00021977		Y58A7A.3	0.00198207	1.21559
WBGene00019166	tat-2	H06H21.10	0.00366578	1.21221
WBGene00006680	twk-28	C52B9.6	0.0203923	1.21115
WBGene00003092	lys-3	Y22F5A.6	0.0558282	1.21108
WBGene00017093		E02C12.8	0.0446987	1.2101
WBGene00017012	acs-22	D1009.1	0.00327485	1.19947
WBGene00001059	dpf-6	F44B9.1	0.0177242	1.19549
WBGene00011362		T02B5.1	0.0524426	1.19347
WBGene00011445		T04F8.7	0.00205007	1.19061
WBGene00008368		D1053.3	0.0201464	1.18973
WBGene00019146		H02F09.3	0.00887402	1.18546
WBGene00007460		C08F11.13	0.015144	1.184
WBGene00010746		K10D11.2	0.0621134	1.18333
WBGene00021895	clec-84	Y54G2A.33	0.00809851	1.18108
WBGene00006650	tts-1	F09E10.11	0.0185322	1.18064
WBGene00013090		Y51B9A.8	0.0558674	1.17889
WBGene00003689	nhr-99	M02H5.1	0.0731976	1.17693
WBGene00021709	ugt-29	Y49C4A.8	0.00278633	1.16881
WBGene00044488		Y54G2A.45	0.0095264	1.16878
WBGene00016379		C33H5.13	0.00947679	1.16466
WBGene00015220		B0507.3	0.00808514	1.16263
WBGene00009971		F53C11.1	0.00192525	1.16205
WBGene00022562		ZC204.12	0.0593468	1.16072
WBGene00009773	lipl-2	F46B6.8	0.0764341	1.15682
WBGene00015110		B0281.3	0.00642781	1.15512
WBGene00016594		C42D4.1	0.00343394	1.15231
WBGene00020576		T19D12.1	0.0206634	1.15153
WBGene00021253		Y22D7AL.15	0.00589661	1.1444
WBGene00002274	lec-11	F38A5.3	0.00761925	1.13969
WBGene00008255		C51E3.10	0.0894367	1.13777
WBGene00000373	cyp-14A5	F08F3.7	0.0074386	1.1269
WBGene00020580		T19D12.5	0.0497869	1.12558
WBGene00010047		F54D1.6	0.00427496	1.1177
WBGene00001157	ech-8	F01G10.2	0.00745487	1.11623
WBGene00013650		Y105C5B.9	0.0487142	1.11444
WBGene00001391	far-7	K01A2.2	0.0982574	1.11442
WBGene00009663	hda-5	F43G6.11	0.0255325	1.11291
WBGene00008850		F15B9.6	0.0394596	1.11241
WBGene00003702	nhr-112	Y70C5C.6	0.0790232	1.10852
WBGene00018646	mul-1	F49F1.6	0.0514331	1.10732
WBGene00008234		C50F4.9	0.0435558	1.10471
WBGene00008485	ugt-43	F01D4.1	0.0969681	1.10393
WBGene00010063	dhrs-4	F54F3.4	0.0265956	1.10171
WBGene00010723	cpg-7	K09E4.6	0.0459083	1.10117
WBGene00004993	spp-8	C28C12.5	0.0112802	1.09616
WBGene00003561	ncr-1	F02E8.6	0.00511114	1.09225
WBGene00016762	ugt-24	C49A9.8	0.023351	1.09044
WBGene00007506		C10C5.2	0.0108063	1.08755
WBGene00015767	hex-2	C14C11.3	0.00858791	1.08128
WBGene00003605	nhr-6	C48D5.1	0.0330347	1.08051
WBGene00001527	gcs-1	F37B12.2	0.00611449	1.0804
WBGene00010977		R02D5.3	0.0333698	1.07752
WBGene00008564	acox-1	F08A8.1	0.0148975	1.07158
WBGene00045411		C25F9.11	0.0298202	1.07151
WBGene00017071	aagr-1	D2096.3	0.026545	1.0689
WBGene00016119		C25H3.10	0.0837918	1.0689
WBGene00003648	nhr-58	R11G11.2	0.0865861	1.06726
WBGene00019744		M02H5.8	0.00926286	1.06642
WBGene00022736		ZK418.7	0.0286449	1.06253
WBGene00008199		C49C3.9	0.0095264	1.05481
WBGene00010747		K10D11.3	0.0416288	1.05409
WBGene00206354		F27E5.9	0.0477793	1.0517
WBGene00016728		C46H11.2	0.0865002	1.04929
WBGene00000973	dhs-9	Y32H12A.3	0.0308722	1.04913
WBGene00019060		F58F9.7	0.0201464	1.049
WBGene00021979		Y58A7A.5	0.070845	1.04642
WBGene00011042		R05H10.1	0.0907401	1.04507
WBGene00014138	clec-186	ZK896.7	0.0286155	1.04213
WBGene00007919		C34C6.7	0.0581338	1.04001
WBGene00019730	asns-2	M02D8.4	0.039015	1.03035
WBGene00022326	fbxa-14	Y82E9BL.10	0.0865002	1.0235
WBGene00012970		Y48A6B.9	0.0912859	1.00137

## Sheet: set2 UP PA14
wormbase_id	geane_name	sequence	padj	log2FoldChange
WBGene00018374	tag-343	F43B10.2	0.00917505	1.00433
WBGene00019351	lron-7	K03A1.2	2.09e-06	1.00621
WBGene00012548		Y37D8A.6	0.00264737	1.00687
WBGene00018969		F56D3.1	0.0965139	1.00701
WBGene00045397		Y54G2A.52	0.0280314	1.00744
WBGene00013763		Y113G7B.14	0.00399303	1.00744
WBGene00007317		C05A9.2	0.00787243	1.01015
WBGene00001559	gei-1	F45H7.2	0.00167028	1.01188
WBGene00004405	rop-1	C12D8.11	2.97e-06	1.01259
WBGene00003617	nhr-18	F44C8.3	0.0517969	1.01491
WBGene00001169	eef-1A.2	R03G5.1	4.6e-07	1.01584
WBGene00017430	bcl-11	F13H6.1	0.0145701	1.01622
WBGene00022200	fard-1	Y71H10A.2	7.27e-06	1.01845
WBGene00002087	ins-4	ZK75.1	0.0874607	1.01944
WBGene00008233		C50F4.8	0.00385667	1.02023
WBGene00045208		F13E9.15	0.0260039	1.02095
WBGene00006575	tir-1	F13B10.1	8.09e-06	1.02107
WBGene00003980	pes-7	F09C3.1	0.000386082	1.02156
WBGene00016260		C30F12.1	0.000188957	1.02407
WBGene00001250	elt-2	C33D3.1	0.00143183	1.02515
WBGene00006444	shn-1	C33B4.3	0.00824577	1.02598
WBGene00010747		K10D11.3	0.055727	1.02707
WBGene00016542		C39H7.4	0.00293934	1.02858
WBGene00000067	act-5	T25C8.2	4.19e-08	1.03206
WBGene00022649		ZK84.1	0.0407132	1.03266
WBGene00012085		T27D12.1	0.000311604	1.03411
WBGene00012306		W06F12.2	0.00482504	1.03587
WBGene00015956		C18B2.5	2.47e-07	1.03601
WBGene00004810	skr-4	Y60A3A.18	0.00387143	1.03712
WBGene00004008	pgp-14	F22E10.3	0.0188921	1.04042
WBGene00015955		C18B2.4	1.07e-07	1.04071
WBGene00016975	nhr-173	C56E10.1	0.0567999	1.0424
WBGene00000298	cat-4	F32G8.6	0.00802165	1.04305
WBGene00008652		F10D11.6	0.0740093	1.0431
WBGene00020158		T02C5.1	3.37e-06	1.04367
WBGene00018266	nhr-183	F41B5.10	0.0905225	1.0446
WBGene00022861	dve-1	ZK1193.5	0.000334703	1.04649
WBGene00045461		C25F9.14	0.0652298	1.0467
WBGene00017727		F22H10.3	0.000808272	1.05049
WBGene00044623	bus-8	T23F2.1	0.0929124	1.05075
WBGene00001591	glc-1	F11A5.10	0.000744272	1.05223
WBGene00011856		T20D3.2	0.000374697	1.05273
WBGene00008748	yap-1	F13E6.4	9.05e-06	1.05597
WBGene00001184	egl-15	F58A3.2	0.00336893	1.05605
WBGene00010150		F56D5.6	0.014525	1.05805
WBGene00018398	sptl-2	F43H9.2	0.000466014	1.05992
WBGene00001754	gst-6	F11G11.3	0.0571292	1.06045
WBGene00003735	nhx-8	Y18D10A.6	1.04e-05	1.06055
WBGene00016716	acs-17	C46F4.2	0.000359981	1.06199
WBGene00022951		C30E1.9	0.000670692	1.06315
WBGene00044672	fbxa-4	F42G2.8	0.0419763	1.06339
WBGene00014181		ZK1010.8	0.0548802	1.06403
WBGene00011725	lips-5	T12A7.4	0.0271603	1.06659
WBGene00016191		C28G1.6	0.0568716	1.06743
WBGene00008101		C44H9.6	0.00115552	1.07391
WBGene00018216		F40A3.1	9.87e-05	1.07487
WBGene00019858		R03H10.6	0.0999718	1.07673
WBGene00012814		Y43F8B.3	0.0982708	1.07951
WBGene00010503		K02C4.5	0.000371996	1.07999
WBGene00002039	hum-6	T10H10.1	0.00155473	1.08146
WBGene00010050		F54D5.4	0.00641791	1.08222
WBGene00021326		Y34B4A.10	0.0338527	1.08306
WBGene00017487		F15E6.6	0.000648741	1.08364
WBGene00007365		C06B3.6	0.0292809	1.08397
WBGene00004778	ser-3	K02F2.6	0.0026931	1.08492
WBGene00000562	cng-1	F14H8.6	0.0910992	1.0877
WBGene00007228	acs-7	C01G6.7	0.00297613	1.08797
WBGene00007857		C31H5.6	0.0040157	1.0891
WBGene00001501	ftn-2	D1037.3	2.16e-07	1.08952
WBGene00012819		Y43F8B.9	0.0652298	1.08989
WBGene00001063	dpy-1	M01E10.2	0.0747483	1.09131
WBGene00019518		K08B5.1	0.0858244	1.09195
WBGene00003978	pes-4	Y119D3B.17	0.000166662	1.09297
WBGene00000458	ceh-37	C37E2.5	0.000530166	1.09495
WBGene00020504	svh-2	T14E8.1	4.02e-06	1.09688
WBGene00011821	cdf-2	T18D3.3	0.0500652	1.09808
WBGene00008149	pyp-1	C47E12.4	1.05e-07	1.09814
WBGene00005003	spp-18	F27C8.4	0.00447769	1.10145
WBGene00008401		D2005.6	0.0758715	1.10295
WBGene00219770	linc-40	Y82E9BL.20	0.0152335	1.10343
WBGene00003688	nhr-98	M02H5.6	0.023468	1.10467
WBGene00019955		R08C7.12	6.91e-05	1.1054
WBGene00021256		Y22D7AR.2	0.0384009	1.10577
WBGene00018101	math-27	F36H5.2	0.0407207	1.10601
WBGene00007525		C11G10.1	0.0667826	1.1062
WBGene00013755	fbxa-115	Y113G7B.3	0.019808	1.10936
WBGene00010041		F54C9.3	0.00671938	1.11224
WBGene00004115	pqn-26	DY3.5	0.0987797	1.11264
WBGene00012013	ugt-54	T25B9.7	0.0142987	1.1127
WBGene00007593		C14H10.3	1.21e-05	1.11593
WBGene00009403		F35C11.4	0.0023249	1.11715
WBGene00013643		Y105C5A.24	0.000537347	1.11849
WBGene00003766	nlp-28	B0213.3	0.0239459	1.11926
WBGene00002234	kqt-2	M60.5	0.000689847	1.12063
WBGene00008091		C44F1.1	0.00436318	1.12074
WBGene00019017		F57F4.4	0.000147922	1.12079
WBGene00001500	ftn-1	C54F6.14	0.0995586	1.12169
WBGene00018044		F35D11.3	0.000157523	1.12521
WBGene00021495	sqst-2	Y40C5A.1	0.000458298	1.1254
WBGene00007453	fbxa-98	C08F11.5	0.0412574	1.12546
WBGene00022196	gpa-17	Y71H2B.7	0.00123169	1.12607
WBGene00007322		C05B5.5	0.0465032	1.12622
WBGene00018274		F41C3.8	0.025519	1.12779
WBGene00021044		W05H7.1	6.09e-05	1.1309
WBGene00016719	math-24	C46F9.3	0.0616829	1.13152
WBGene00011948		T23F1.5	0.0727161	1.13175
WBGene00009722		F45D3.2	0.00286253	1.13267
WBGene00016599		C42D8.1	0.0364132	1.13301
WBGene00000480	cgp-1	Y38C9A.2	5.78e-08	1.13607
WBGene00019682		K12H4.7	5.08e-06	1.13796
WBGene00017892		F28B4.3	5.4e-08	1.1396
WBGene00003968	peb-1	T14F9.4	0.000159761	1.14005
WBGene00044723		K11H12.11	0.0937926	1.14055
WBGene00001899	his-25	ZK131.2	0.0286104	1.14142
WBGene00013898		ZC443.3	0.000341512	1.14649
WBGene00001644	gly-19	F22D6.12	0.0364132	1.14756
WBGene00002054	ifb-2	F10C1.7	2.01e-06	1.14814
WBGene00019068	faah-3	F58H7.2	0.000321423	1.1505
WBGene00018704	ztf-13	F52E4.8	4.24e-05	1.15289
WBGene00020801		T25D10.4	0.000374615	1.15294
WBGene00006948	wrt-2	F52E4.6	0.077226	1.15387
WBGene00002990	lin-1	C37F5.1	2.71e-06	1.15766
WBGene00007195		B0513.2	0.0159238	1.15878
WBGene00004898	snb-2	F23H12.1	8.34e-06	1.1599
WBGene00021768		Y51F10.7	2.07e-05	1.16015
WBGene00011182		R09H10.5	1.24e-07	1.16051
WBGene00017964		F31F7.1	3.95e-06	1.16288
WBGene00018487		F46C8.8	0.0871003	1.16342
WBGene00003907	paf-2	C52B9.7	0.00222608	1.16475
WBGene00019115	nhr-195	F59E11.10	0.0955908	1.16536
WBGene00007180		B0457.6	0.000759853	1.16768
WBGene00017840	ttm-2	F26G1.4	0.00197977	1.16811
WBGene00018755	bcmo-2	F53C3.12	0.00353287	1.1708
WBGene00018153		F37C12.10	0.0855076	1.17125
WBGene00013227		Y56A3A.6	3.36e-05	1.17162
WBGene00008483		E04D5.4	0.0637937	1.17223
WBGene00001391	far-7	K01A2.2	0.047558	1.17343
WBGene00001918	his-44	F08G2.1	0.0879125	1.17379
WBGene00001889	his-15	ZK131.9	0.0879125	1.17379
WBGene00019261		H34I24.2	6.07e-06	1.17505
WBGene00021876		Y54G2A.11	4.32e-07	1.17844
WBGene00019780		M60.4	6.38e-05	1.18054
WBGene00017438		F13H8.5	0.0546413	1.18193
WBGene00206380		C42D4.18	0.0280354	1.18665
WBGene00007694		C23H4.6	0.000732127	1.18845
WBGene00019859		R03H10.7	0.0727161	1.19035
WBGene00012554		Y37D8A.16	0.00367034	1.1948
WBGene00004382	rnh-1.0	F59A6.6	0.00733755	1.1961
WBGene00022495	fbxa-78	Y119D3B.19	0.0576589	1.19628
WBGene00001208	egl-44	F28B12.2	1.45e-07	1.19669
WBGene00018300		F41G3.3	0.0851028	1.19799
WBGene00003778	nnt-1	C15H9.1	0.028174	1.19989
WBGene00008498		F01D5.8	0.034319	1.20003
WBGene00017582		F18G5.6	1.07e-07	1.20044
WBGene00015046	nlp-34	B0213.17	0.0622042	1.20272
WBGene00021178		Y9C9A.8	0.0538982	1.20293
WBGene00006798	unc-64	F56A8.7	2.3e-06	1.20749
WBGene00016231		C29G2.3	0.0879125	1.20753
WBGene00018031		F35B3.4	0.0903625	1.20796
WBGene00001345	fos-1	F29G9.4	1.67e-07	1.20968
WBGene00195026		F39E9.19	0.00286289	1.20976
WBGene00002056	ifc-2	M6.1	4.59e-10	1.21044
WBGene00011596		T07G12.5	0.0598475	1.21173
WBGene00002018	hsp-16.41	Y46H3A.2	0.0740093	1.21774
WBGene00021340		Y34F4.5	7.73e-05	1.21777
WBGene00011978		T24B8.4	0.00600938	1.21943
WBGene00003640	nhr-50	C06C6.5	0.034319	1.22068
WBGene00006965	xtr-1	F54F7.4	0.0650724	1.22083
WBGene00004002	pgp-8	T21E8.3	0.049145	1.22574
WBGene00016646	fbxc-5	C44C8.1	0.0733483	1.22579
WBGene00016649	fbxc-1	C44C8.4	0.0733483	1.22579
WBGene00019619	asp-14	K10C2.3	1.42e-05	1.22599
WBGene00019967	cyp-33C8	R08F11.3	0.00253734	1.22847
WBGene00013968		ZK287.9	0.00952605	1.22868
WBGene00020576		T19D12.1	0.000142572	1.22884
WBGene00009430		F35E12.6	3.79e-07	1.23113
WBGene00021260		Y22D7AR.6	0.000223103	1.2326
WBGene00004037	plc-2	Y75B12B.6	8.83e-06	1.23469
WBGene00018594	aman-3	F48C1.1	0.00167792	1.23504
WBGene00010870	let-522	M05B5.2	0.000322531	1.23587
WBGene00016866	coel-1	C52B9.3	8.45e-06	1.23708
WBGene00021927	abhd-14	Y55F3AM.10	0.00820246	1.23713
WBGene00016146		C26F1.1	0.0449795	1.24061
WBGene00004096	pqm-1	F40F8.7	5.82e-05	1.24215
WBGene00000219	asp-6	F21F8.7	4.07e-06	1.24239
WBGene00000214	asp-1	Y39B6A.20	8.93e-06	1.24674
WBGene00021898		Y54G2A.36	0.000101889	1.24707
WBGene00021325		Y34B4A.9	1.8e-06	1.24727
WBGene00008301	dct-3	C54D10.7	0.0733483	1.24761
WBGene00002272	lec-9	C16H3.2	5.73e-08	1.24845
WBGene00011286	ttr-29	R90.4	0.0467847	1.24948
WBGene00004146	pqn-63	T06E4.11	0.0672415	1.25029
WBGene00015389	scav-1	C03F11.3	7.18e-06	1.25136
WBGene00019779		M60.2	0.0639259	1.25653
WBGene00008228		C50B8.6	1.9e-05	1.25701
WBGene00021895	clec-84	Y54G2A.33	1.04e-06	1.25829
WBGene00004123	pqn-36	F39D8.1	0.00748368	1.25853
WBGene00012668		Y39B6A.5	3.08e-07	1.26006
WBGene00008213		C49F8.1	0.0241729	1.26262
WBGene00018225	nep-14	F40B5.1	0.067856	1.26497
WBGene00011090		R07B7.6	0.000374423	1.26674
WBGene00020972	trpl-2	W03B1.2	0.00416644	1.26681
WBGene00018210		F39G3.5	0.000251653	1.26762
WBGene00008199		C49C3.9	0.0648545	1.26791
WBGene00010605		K06G5.1	1.73e-06	1.26854
WBGene00012462		Y17G7B.8	0.000313852	1.27019
WBGene00021087		W08E12.6	0.0363479	1.27447
WBGene00021084		W08E12.3	0.0636573	1.27647
WBGene00021121		W09G12.7	0.00527569	1.27734
WBGene00019957		R08E3.1	1.04e-12	1.27856
WBGene00012494	nhr-232	Y22F5A.1	0.00134895	1.28106
WBGene00015169		B0403.5	0.00330612	1.28127
WBGene00010545	cbp-2	K03H1.10	0.000367469	1.28135
WBGene00194695		B0462.5	0.0544231	1.28368
WBGene00002041	hum-8	Y66H1A.6	8.58e-07	1.28989
WBGene00011429		T04C12.7	0.0530045	1.2906
WBGene00004003	pgp-9	C47A10.1	0.00167792	1.29086
WBGene00044396		ZK1290.14	0.000764639	1.29101
WBGene00005931	fbxa-199	T06E6.3	0.0582379	1.29112
WBGene00008644		F10C2.3	0.0131879	1.29413
WBGene00016596		C42D4.3	0.0525154	1.29611
WBGene00015110		B0281.3	6.18e-06	1.29656
WBGene00008602	oac-14	F09B9.1	0.0118734	1.29785
WBGene00016735	fhod-1	C46H11.11	1.03e-05	1.30272
WBGene00021085		W08E12.4	0.0548849	1.30289
WBGene00016407		C34D10.2	3.01e-09	1.30581
WBGene00013119		Y51H4A.25	0.0400454	1.30592
WBGene00020222	fut-6	T05A7.5	0.00106804	1.30674
WBGene00021885		Y54G2A.20	0.0340691	1.30906
WBGene00007919		C34C6.7	0.00401625	1.31027
WBGene00017591		F19C7.1	1.72e-11	1.31101
WBGene00044660	fbxa-87	F44G3.13	0.047558	1.31206
WBGene00012005	jun-1	T24H10.7	1.5e-08	1.31485
WBGene00006467	magu-2	C01B7.4	1.64e-05	1.32086
WBGene00015476		C05D9.9	8.68e-05	1.32776
WBGene00022494	fbxa-91	Y119D3B.18	0.0455439	1.32897
WBGene00011978		T24B8.4	2.71e-08	1.33171
WBGene00012144		T28H10.3	0.0363479	1.33571
WBGene00017969		F32A5.3	3.99e-08	1.33627
WBGene00011536		T06E4.9	0.0375641	1.34095
WBGene00011076	scav-5	R07B1.3	3.06e-05	1.3443
WBGene00194726		R13A5.15	0.0380695	1.34502
WBGene00015085		B0244.10	0.000653929	1.35164
WBGene00016190		C28G1.5	5.27e-06	1.35274
WBGene00007932	zip-5	C34D1.5	8.68e-05	1.3592
WBGene00001577	gem-4	T12A7.1	2.01e-07	1.36094
WBGene00006372	syx-2	F48F7.2	5.23e-06	1.36336
WBGene00013197	ttm-5	Y54E5A.1	2.13e-05	1.3664
WBGene00013009	fbxc-23	Y48E1B.11	0.013517	1.37029
WBGene00013119		Y51H4A.25	0.00446153	1.37526
WBGene00003689	nhr-99	M02H5.1	0.0160643	1.37839
WBGene00019373		K04A8.1	1.41e-05	1.38083
WBGene00021396	cutl-24	Y38C1AA.5	5.02e-05	1.38115
WBGene00011073		R07A4.2	0.00183074	1.38406
WBGene00002271	lec-8	R07B1.10	4.06e-06	1.38414
WBGene00012444		Y15E3A.5	2.05e-07	1.38623
WBGene00010522		K03A11.5	0.00116701	1.38713
WBGene00022496	fbxa-92	Y119D3B.20	0.00312892	1.39095
WBGene00012624	fbxa-150	Y38H6C.11	0.000648741	1.39391
WBGene00019756		M03E7.4	0.0331886	1.3945
WBGene00009798		F46G10.4	0.000605756	1.39508
WBGene00020456	fbxa-60	T12B5.10	2.18e-05	1.39604
WBGene00001917	his-43	F08G2.2	0.00318805	1.39678
WBGene00001886	his-12	ZK131.6	0.00318805	1.39678
WBGene00009226	cyp-37B1	F28G4.1	0.00159969	1.39989
WBGene00022330	fbxa-80	Y82E9BL.14	0.00641791	1.40035
WBGene00021635		Y47G6A.5	1.59e-05	1.40427
WBGene00013146		Y53C12B.7	0.00179179	1.40431
WBGene00014771		F55G11.3	0.0244358	1.4053
WBGene00004131	pqn-44	F55A12.9	4.98e-12	1.40598
WBGene00015295	acl-12	C01C10.3	1.06e-08	1.40771
WBGene00019958		R08E3.2	4.38e-05	1.41059
WBGene00021261		Y22D7AR.7	0.0287041	1.41061
WBGene00008493		F01D5.2	0.00802001	1.41606
WBGene00010453	fozi-1	K01B6.1	1.75e-06	1.41856
WBGene00019300	swt-1	K02D7.5	8.76e-05	1.41972
WBGene00009595		F40F12.7	7.47e-05	1.42049
WBGene00019644	cpt-4	K11D12.4	1.64e-05	1.42061
WBGene00000373	cyp-14A5	F08F3.7	0.00158611	1.42702
WBGene00021197		Y17G9A.4	0.00324047	1.42877
WBGene00016379		C33H5.13	0.0136691	1.43039
WBGene00002174	itx-1	W03D8.6	1.38e-09	1.43448
WBGene00045507		F10A3.17	0.000110917	1.43474
WBGene00009393	clec-62	F35C5.5	1.5e-06	1.44033
WBGene00006718	ubc-23	C28G1.1	0.00194858	1.44352
WBGene00019166	tat-2	H06H21.10	0.000263683	1.44851
WBGene00012622		Y38H6C.9	0.0200861	1.45979
WBGene00001695	grd-6	T18H9.1	0.0175419	1.46097
WBGene00019738	clec-265	M02F4.7	0.0182645	1.4632
WBGene00010795		M01A8.1	0.000832515	1.46521
WBGene00015280		C01B10.6	1.91e-08	1.46649
WBGene00015122		B0302.5	1.58e-11	1.46753
WBGene00016958	ilys-4	C55F2.2	0.000400264	1.46801
WBGene00015081		B0244.6	0.00142111	1.472
WBGene00022411		Y102A11A.1	0.00130161	1.47205
WBGene00020386	cyp-34A4	T09H2.1	9.03e-05	1.47315
WBGene00004169	pqn-89	Y73B6BR.1	1.54e-06	1.47559
WBGene00044166		C54C6.7	0.000342998	1.47898
WBGene00006650	tts-1	F09E10.11	0.0118731	1.47988
WBGene00017905		F28F5.6	1.39e-05	1.48224
WBGene00044743	crb-3	C35B8.4	8.23e-05	1.48661
WBGene00019327	zip-2	K02F3.4	1.68e-13	1.48898
WBGene00001885	his-11	ZK131.5	4.75e-05	1.48988
WBGene00016769		C49C8.5	2.51e-08	1.49709
WBGene00015382		C03B1.14	0.000118988	1.50711
WBGene00015716	sox-4	C12D12.5	2.38e-07	1.51091
WBGene00001581	gfi-1	F57F4.3	1.06e-05	1.51595
WBGene00021590		Y46D2A.2	1.63e-05	1.51793
WBGene00009093		F23H12.3	6.02e-05	1.51879
WBGene00010850		M04C3.1	2.77e-10	1.52396
WBGene00044418		C08G5.7	9.24e-06	1.52434
WBGene00010987		R03C1.1	0.00470288	1.52691
WBGene00000973	dhs-9	Y32H12A.3	3.88e-09	1.53068
WBGene00003648	nhr-58	R11G11.2	0.000791363	1.53153
WBGene00017302		F09F7.5	1.09e-12	1.53811
WBGene00006650	tts-1	F09E10.11	0.000689847	1.54266
WBGene00008486	ugt-44	F01D4.2	5.05e-06	1.54356
WBGene00004796	sid-2	ZK520.2	1.97e-05	1.54667
WBGene00011965		T23G7.2	0.00882397	1.54746
WBGene00013947		ZK228.4	4.14e-10	1.54954
WBGene00015791		C15C7.5	8.91e-11	1.55149
WBGene00008229		C50F4.1	8.31e-08	1.55226
WBGene00016865	ets-9	C52B9.2	6.6e-07	1.55356
WBGene00018939	fbxa-190	F56C3.2	0.000261927	1.5634
WBGene00004987	spp-2	T08A9.12	5.68e-09	1.56914
WBGene00008227		C50B8.5	0.00038556	1.57324
WBGene00006923	vhp-1	F08B1.1	1.88e-18	1.57352
WBGene00020455	fbxa-59	T12B5.8	1.81e-06	1.58056
WBGene00019213		H20E11.1	3.07e-07	1.5815
WBGene00010128		F55G11.8	3.37e-05	1.5827
WBGene00015100		B0280.2	0.000499615	1.58416
WBGene00001768	gst-20	Y48E1B.10	1.13e-08	1.5855
WBGene00010047		F54D1.6	1.87e-08	1.58599
WBGene00015947		C18A11.1	0.00147903	1.58754
WBGene00008698		F11D11.3	0.00893205	1.58756
WBGene00021339		Y34F4.4	0.000759726	1.58896
WBGene00022486	fbxa-61	Y119D3B.8	0.00114878	1.59144
WBGene00014164	lact-2	ZK945.1	5.24e-11	1.59186
WBGene00009396	clec-65	F35C5.8	9.94e-09	1.59283
WBGene00009394	clec-63	F35C5.6	3.64e-11	1.59344
WBGene00012140		T28F4.5	9.8e-17	1.59368
WBGene00044280		W02A2.9	0.000689575	1.59927
WBGene00013080		Y51A2D.13	2.01e-07	1.60585
WBGene00012810	nceh-1	Y43F8A.3	0.000256711	1.60949
WBGene00012529		Y32F6A.4	3.85e-12	1.61036
WBGene00002058	ifd-2	F25E2.4	1.46e-09	1.61186
WBGene00017398	slc-17.6	F12B6.2	0.00333336	1.6123
WBGene00022593		ZC328.3	2.97e-11	1.61595
WBGene00010851		M04C3.2	5.52e-05	1.62504
WBGene00006470	tag-120	F40F9.2	5.3e-06	1.6267
WBGene00018823		F54E2.1	3.9e-06	1.62896
WBGene00001852	hil-1	C30G7.1	8.74e-06	1.63183
WBGene00015933		C17H12.8	7.38e-06	1.63354
WBGene00019973		R09A1.3	6.91e-05	1.63439
WBGene00004809	skr-3	F44G3.6	6.77e-08	1.63589
WBGene00022326	fbxa-14	Y82E9BL.10	9.06e-07	1.63913
WBGene00022327	fbxa-15	Y82E9BL.11	0.00197417	1.6451
WBGene00008886		F16C3.2	1.82e-06	1.64546
WBGene00015079		B0244.4	0.00425197	1.65547
WBGene00003480	klf-3	F54H5.4	4.51e-13	1.65658
WBGene00021397		Y38C1AA.6	0.000129169	1.66058
WBGene00022142		Y71G12B.2	0.00443078	1.66119
WBGene00001441	fkh-9	K03C7.2	1.49e-13	1.66348
WBGene00008495		F01D5.5	5.41e-06	1.66598
WBGene00003090	lys-1	Y22F5A.4	6.04e-08	1.66665
WBGene00015167		B0403.3	0.000157914	1.67312
WBGene00021354	fpn-1.1	Y37E3.16	1.36e-06	1.67337
WBGene00009433		F35E12.9	2.02e-05	1.67354
WBGene00014138	clec-186	ZK896.7	1.1e-08	1.67448
WBGene00007866		C32H11.3	0.00218858	1.67672
WBGene00008234		C50F4.9	8.29e-05	1.67716
WBGene00000022	abt-4	Y39D8C.1	6.82e-17	1.6797
WBGene00003561	ncr-1	F02E8.6	3.62e-11	1.68242
WBGene00021020		W04B5.3	5.86e-18	1.68418
WBGene00194926		K08D8.12	0.00159167	1.68438
WBGene00044402		Y82E9BL.18	0.000207654	1.68643
WBGene00007835	oac-7	C31A11.7	0.0011909	1.69002
WBGene00044772		T23E7.6	0.00341289	1.7039
WBGene00022382		Y94H6A.10	0.00173753	1.7094
WBGene00012464	arrd-7	Y17G7B.11	9.04e-10	1.71425
WBGene00008498		F01D5.8	0.000283977	1.71539
WBGene00008944		F19B2.5	1.26e-07	1.73067
WBGene00015597	fbxa-162	C08E3.5	0.00261341	1.73536
WBGene00002269	lec-6	Y55B1AR.1	6.35e-09	1.73568
WBGene00020740		T23F4.2	2.75e-11	1.73722
WBGene00010062	lipl-1	F54F3.3	1.77e-07	1.73734
WBGene00019170		H06I04.6	2.25e-08	1.74109
WBGene00016997	cebp-1	D1005.3	2.35e-12	1.74737
WBGene00022329	fbxa-79	Y82E9BL.13	1.64e-05	1.75579
WBGene00015713		C12D12.1	2.58e-22	1.75601
WBGene00008599		F09A5.2	1.53e-06	1.75728
WBGene00004811	skr-5	F47H4.10	0.000615538	1.76067
WBGene00010475		K01F9.2	2.6e-08	1.77284
WBGene00009433		F35E12.9	6.85e-06	1.78402
WBGene00006649	tth-1	F08F1.8	1.2e-21	1.78455
WBGene00021556		Y45G5AM.3	2.24e-07	1.78496
WBGene00002016	hsp-16.2	Y46H3A.3	0.00107179	1.78546
WBGene00007320		C05B5.2	0.00120773	1.79061
WBGene00015216	valv-1	B0496.7	3.23e-06	1.79199
WBGene00012028	srz-99	T25E12.13	0.00150293	1.79346
WBGene00011894	ttr-23	T21C9.8	0.000101889	1.79865
WBGene00018461		F45D11.16	2.15e-05	1.8011
WBGene00018460		F45D11.15	2.15e-05	1.8011
WBGene00006680	twk-28	C52B9.6	4.7e-06	1.80799
WBGene00022847		ZK1055.6	2.88e-08	1.81131
WBGene00018350	ifo-1	F42C5.10	4.03e-11	1.81268
WBGene00044468		Y69A2AL.2	1.05e-06	1.82775
WBGene00010659		K08D8.5	1.81e-10	1.85003
WBGene00009805		F47B8.4	0.000314069	1.85232
WBGene00010723	cpg-7	K09E4.6	9.52e-05	1.85567
WBGene00012532	crp-1	Y32F6B.3	1.97e-08	1.85695
WBGene00015695	ugt-26	C10H11.6	2.57e-07	1.8575
WBGene00077525		C41G7.8	0.000493764	1.85839
WBGene00022040		Y65B4BR.1	1.96e-06	1.86561
WBGene00011844		T19C9.8	0.000759853	1.87034
WBGene00011213		R10E8.8	6.61e-07	1.87645
WBGene00019213		H20E11.1	0.000194059	1.87905
WBGene00018646	mul-1	F49F1.6	6.28e-06	1.88158
WBGene00010935		M163.1	1.2e-19	1.88528
WBGene00013842	fbxa-34	ZC47.10	0.000256362	1.88908
WBGene00008922		F17C11.11	5.73e-11	1.88955
WBGene00015455		C04G6.5	0.000638444	1.89071
WBGene00017726		F22H10.2	8.94e-07	1.89456
WBGene00018601		F48C1.9	0.000689847	1.90777
WBGene00008019		C38H2.2	4.51e-19	1.91651
WBGene00016332		C32F10.4	6.93e-16	1.92568
WBGene00006464	bath-47	T07H3.1	0.000167824	1.92669
WBGene00003653	nhr-63	C06C6.4	1.96e-06	1.92941
WBGene00021517		Y41D4B.15	0.00048972	1.93113
WBGene00194803		C25F9.16	0.000518673	1.93704
WBGene00022848		ZK1055.7	4.36e-12	1.94447
WBGene00000191	arl-7	F20D1.5	0.000159761	1.94856
WBGene00010899		M28.8	3.28e-21	1.94966
WBGene00009023		F21G4.1	1.04e-11	1.95189
WBGene00009971		F53C11.1	6.62e-07	1.95297
WBGene00017416		F13B6.1	2.81e-05	1.96016
WBGene00018839		F54H5.2	0.000270026	1.96415
WBGene00012027	fbxa-127	T25E12.12	0.000184134	1.97173
WBGene00001770	gst-22	F21H7.1	4.15e-07	1.97714
WBGene00016379		C33H5.13	2.87e-10	1.98611
WBGene00003092	lys-3	Y22F5A.6	0.000180313	1.98725
WBGene00022736		ZK418.7	3.31e-07	1.98975
WBGene00044681		T24C4.8	0.000178577	1.99541
WBGene00018724		F53A9.1	3.89e-15	2.00154
WBGene00019547		K09C4.1	4.43e-09	2.01177
WBGene00002273	lec-10	W01A11.4	9.28e-17	2.01931
WBGene00016360		C33G8.2	1.69e-06	2.01997
WBGene00019744		M02H5.8	1.05e-16	2.02186
WBGene00005833	srw-86	C25F9.7	0.000169418	2.02401
WBGene00015859		C16D9.4	1.49e-08	2.0389
WBGene00013559		Y75B8A.28	1.13e-12	2.0432
WBGene00012101	zip-10	T27F2.4	8.66e-10	2.04505
WBGene00005141	srd-64	Y22D7AR.8	5.7e-05	2.0468
WBGene00015048	faah-2	B0218.2	8.66e-10	2.05989
WBGene00013845	fbxa-37	ZC47.14	1.53e-06	2.06448
WBGene00021118	clec-125	W09G10.6	1.91e-05	2.06659
WBGene00013841	fbxa-33	ZC47.9	5.83e-05	2.08876
WBGene00015823		C16B8.3	6.1e-25	2.10058
WBGene00008255		C51E3.10	3.57e-10	2.10471
WBGene00007689		C18E9.9	4.63e-17	2.10543
WBGene00019579	oac-57	K09E10.1	1.8e-06	2.10969
WBGene00021879	clec-83	Y54G2A.14	1.74e-26	2.11462
WBGene00000562	cng-1	F14H8.6	0.000100548	2.1161
WBGene00007153	clec-41	B0365.6	1.83e-12	2.12067
WBGene00007833	oac-6	C31A11.5	6.97e-11	2.13102
WBGene00018562		F47D12.6	5.83e-14	2.14137
WBGene00010745	dod-17	K10D11.1	2.98e-09	2.14884
WBGene00016425		C34H4.2	3.1e-14	2.16012
WBGene00011737	sqst-1	T12G3.1	9.55e-27	2.16462
WBGene00000841	cul-6	K08E7.7	2.07e-07	2.16528
WBGene00010977		R02D5.3	1.13e-08	2.17457
WBGene00021253		Y22D7AL.15	2.27e-11	2.17729
WBGene00002274	lec-11	F38A5.3	5.25e-12	2.18061
WBGene00003091	lys-2	Y22F5A.5	1.58e-10	2.18132
WBGene00018729		F53A9.6	4.98e-13	2.18461
WBGene00000522	clc-1	C09F12.1	5.43e-15	2.20766
WBGene00007716	fbxa-82	C25D7.4	5.07e-06	2.21096
WBGene00008726		F13A7.11	1.41e-10	2.2231
WBGene00206489		F53F1.14	1.47e-05	2.23477
WBGene00016219		C29F9.4	3.12e-08	2.24657
WBGene00014063	clec-143	ZK673.9	9.17e-06	2.24659
WBGene00010125	dod-22	F55G11.5	5.25e-11	2.2529
WBGene00022891		ZK1290.10	5.07e-06	2.25795
WBGene00077764		F59C6.16	3.37e-15	2.25983
WBGene00015932		C17H12.6	1.3e-05	2.2732
WBGene00022570	sdz-35	ZC239.12	1.06e-05	2.27615
WBGene00021519		Y41D4B.17	4e-13	2.28672
WBGene00021709	ugt-29	Y49C4A.8	9.4e-19	2.29578
WBGene00009488	oac-20	F36G9.12	1.68e-25	2.29663
WBGene00044073	tag-244	C34H4.3	1.81e-10	2.29718
WBGene00006533	tba-7	T28D6.2	2.26e-11	2.31774
WBGene00003605	nhr-6	C48D5.1	1.43e-11	2.32616
WBGene00012910		Y46G5A.20	4.51e-10	2.33251
WBGene00007873	dod-21	C32H11.10	9.11e-06	2.3535
WBGene00001158	ech-9	F01G10.3	1.85e-08	2.35708
WBGene00014135		ZK896.4	4.54e-14	2.36713
WBGene00011672	cyp-13A5	T10B9.2	4.7e-09	2.37398
WBGene00012518	comt-2	Y32B12A.3	5.01e-06	2.37424
WBGene00206354		F27E5.9	6e-16	2.37803
WBGene00000795	crn-2	CD4.2	3.28e-17	2.3783
WBGene00000841	cul-6	K08E7.7	2.48e-08	2.39828
WBGene00018459		F45D11.14	4.04e-23	2.41426
WBGene00016218		C29F9.3	3.92e-23	2.41764
WBGene00019435		K06A9.1	5.73e-20	2.43993
WBGene00021518	hpo-6	Y41D4B.16	1.03e-26	2.45334
WBGene00012583	clec-4	Y38E10A.5	6.11e-07	2.49291
WBGene00002188	kgb-2	ZC416.4	2.33e-12	2.5009
WBGene00012961		Y47H10A.5	8.12e-14	2.51315
WBGene00021435		Y39A3A.4	3.08e-08	2.52145
WBGene00015598	fbxa-163	C08E3.6	1.3e-06	2.52267
WBGene00008850		F15B9.6	4.96e-08	2.53102
WBGene00011445		T04F8.7	6.7e-21	2.53633
WBGene00009397	clec-66	F35C5.9	7.39e-19	2.54286
WBGene00007872		C32H11.9	9.48e-07	2.5502
WBGene00007414		C07E3.3	2.7e-26	2.58168
WBGene00009431	dct-17	F35E12.7	1.93e-15	2.59802
WBGene00021585	clec-74	Y46C8AL.8	1.06e-14	2.59919
WBGene00016785		C49G7.7	4.71e-07	2.60889
WBGene00019273		H43E16.1	9.5e-25	2.61074
WBGene00017484		F15E6.3	2.33e-13	2.61921
WBGene00017093		E02C12.8	6.32e-09	2.63934
WBGene00007875	dod-24	C32H11.12	2.74e-17	2.64704
WBGene00020760		T24C4.4	1.53e-07	2.68081
WBGene00009957		F53B2.8	2.81e-08	2.68667
WBGene00010658		K08D8.4	2.74e-24	2.71165
WBGene00020580		T19D12.5	2.87e-09	2.73139
WBGene00019659		K11H12.3	1.1e-10	2.73743
WBGene00017764		F25A2.1	1.36e-14	2.74098
WBGene00010658		K08D8.4	1.27e-33	2.75192
WBGene00023423		F43C1.7	4.47e-08	2.75541
WBGene00016762	ugt-24	C49A9.8	1.61e-14	2.78828
WBGene00017202	clec-46	F07C4.9	4.61e-08	2.78955
WBGene00003702	nhr-112	Y70C5C.6	3.33e-10	2.79463
WBGene00018874	tag-234	F55C12.7	5.86e-18	2.79626
WBGene00018966		F56D2.5	2.25e-15	2.8192
WBGene00019564		K09D9.1	4.58e-11	2.82157
WBGene00010019		F54B8.4	4.1e-17	2.88823
WBGene00021805		Y53G8AM.5	6.98e-16	2.90674
WBGene00010822		M01G12.9	3.62e-26	2.92352
WBGene00009914		F49H6.13	3.1e-09	2.95904
WBGene00018707	oac-31	F52F10.3	1.15e-20	2.96416
WBGene00006628	tsp-2	C02F5.11	7.1e-16	2.96727
WBGene00001817	haf-7	Y50E8A.16	3.4e-28	2.97815
WBGene00011330		T01D3.6	1.89e-30	3.01053
WBGene00012622		Y38H6C.9	9.04e-10	3.01935
WBGene00009724		F45D3.4	2.25e-37	3.05006
WBGene00012824		Y43F8B.14	1.99e-13	3.06395
WBGene00006627	tsp-1	C02F5.8	6.09e-14	3.10805
WBGene00009432	cld-9	F35E12.8	3.98e-19	3.11686
WBGene00219709	linc-37	K02F3.14	1.38e-10	3.13429
WBGene00016361	drd-10	C33G8.3	2.35e-13	3.17233
WBGene00017466		F14F9.3	6.68e-12	3.17316
WBGene00007440		C08E8.4	7.23e-18	3.1772
WBGene00021262	fbxa-74	Y22D7AR.9	7.14e-29	3.23815
WBGene00013900	ugt-18	ZC443.5	5.15e-14	3.25818
WBGene00008900		F16H6.10	1.78e-23	3.28798
WBGene00008577		F08G2.5	5.94e-25	3.31199
WBGene00019146		H02F09.3	3.59e-38	3.31322
WBGene00044457		C18H7.11	3.94e-25	3.31718
WBGene00016577	clec-3	C41H7.7	1.9e-22	3.32459
WBGene00018971	clec-67	F56D6.2	7.71e-44	3.35763
WBGene00020747		T24A6.7	2.17e-13	3.36643
WBGene00007867		C32H11.4	8.96e-70	3.38256
WBGene00008476		E03H4.8	2.5e-33	3.38711
WBGene00000783	cpr-3	T10H4.12	9.29e-23	3.40968
WBGene00016788		C49G7.10	2.8e-38	3.41366
WBGene00045416		Y37H2A.14	3.67e-28	3.43895
WBGene00000562	cng-1	F14H8.6	1.18e-12	3.44325
WBGene00045411		C25F9.11	7.9e-19	3.50599
WBGene00010123		F55G11.2	2.22e-29	3.51796
WBGene00021978		Y58A7A.4	1.05e-25	3.56653
WBGene00021977		Y58A7A.3	8.92e-42	3.58116
WBGene00011494		T05F1.9	1.53e-16	3.59168
WBGene00018725	kreg-1	F53A9.2	1.45e-23	3.59647
WBGene00020774		T24E12.5	1.98e-25	3.60752
WBGene00013090		Y51B9A.8	1.22e-15	3.76659
WBGene00008105		C45B11.2	9.26e-23	3.84563
WBGene00014136		ZK896.5	4.47e-39	3.85346
WBGene00007717		C25D7.5	7.23e-46	3.86666
WBGene00012450		Y17D7B.2	8.12e-22	3.89619
WBGene00017467		F14F9.4	2.58e-46	3.93921
WBGene00011799		T16G1.5	5.46e-30	3.94314
WBGene00012923	fbxa-128	Y47D3A.2	5.07e-35	3.97767
WBGene00021520		Y41D4B.18	2.57e-51	4.02727
WBGene00021464	ugt-31	Y39G10AR.6	1.43e-42	4.09767
WBGene00045457		F33H12.7	2.18e-39	4.13957
WBGene00004000	pgp-6	T21E8.1	6.81e-38	4.14004
WBGene00021979		Y58A7A.5	5.39e-47	4.20026
WBGene00010658		K08D8.4	1.17e-21	4.34143
WBGene00016424		C34H4.1	2.44e-62	4.36091
WBGene00020579		T19D12.4	6.03e-71	4.48165
WBGene00007506		C10C5.2	3.41e-38	4.55653
WBGene00016845		C50F7.5	1.26e-58	4.58322
WBGene00019660		K11H12.4	7.36e-64	4.80567
WBGene00016783	irg-2	C49G7.5	2.66e-60	4.88664
WBGene00001786	gst-38	F35E8.8	1.69e-62	4.94054
WBGene00007097		B0024.4	6.38e-57	4.94462
WBGene00018708	oac-32	F52F10.4	5.49e-57	4.99062
WBGene00012451		Y17D7B.3	4.78e-34	5.03466
WBGene00004052	parg-2	H23L24.5	1.73e-48	5.12453
WBGene00077593		C49G7.12	6.33e-59	5.12982
WBGene00009428		F35E12.4	6.77e-73	5.15667
WBGene00018760	irg-3	F53E10.4	2.55e-114	5.50478
WBGene00003999	pgp-5	C05A9.1	2.21e-97	5.59064
WBGene00015574	irg-1	C07G3.2	5.19e-70	5.65156
WBGene00004001	pgp-7	T21E8.2	6.94e-47	5.70471
WBGene00007366		C06B3.7	1.09e-79	5.89686

## Sheet: set16 UP PA14
wormbase_id	geane_name	sequence	padj	log2FoldChange
WBGene00004368	ric-19	C32E8.7	0.00934016	1.00094
WBGene00009259	hpo-34	F29G6.3	4.46e-05	1.00119
WBGene00022412		Y102A11A.2	0.00756728	1.0034
WBGene00021256		Y22D7AR.2	0.0867934	1.00426
WBGene00021913	cec-8	Y55B1BR.3	0.0641954	1.00549
WBGene00001398	fat-6	VZK822L.1	3.43e-07	1.00564
WBGene00013677	yars-1	Y105E8A.19	9.93e-11	1.00815
WBGene00003943	pbo-4	K09C8.1	0.0115173	1.00871
WBGene00003933	pat-9	T27B1.2	0.00725221	1.0097
WBGene00000301	cav-1	T13F2.8	0.00673798	1.01168
WBGene00019493	catp-5	K07E3.7	0.0279597	1.01177
WBGene00044469	clec-173	T26C12.6	0.000735338	1.01367
WBGene00022868		ZK1240.3	0.00163044	1.01469
WBGene00001337	ears-1	ZC434.5	1.83e-08	1.01554
WBGene00010870	let-522	M05B5.2	0.00471212	1.01701
WBGene00000674	col-99	F29C4.8	0.0768455	1.02028
WBGene00001158	ech-9	F01G10.3	0.0902616	1.02088
WBGene00018216		F40A3.1	1.8e-05	1.02174
WBGene00008644		F10C2.3	0.00517942	1.02328
WBGene00016757		C49A9.3	0.0684112	1.02469
WBGene00017755	zip-8	F23F12.9	0.0114289	1.02571
WBGene00009888		F49E2.5	1.61e-11	1.02775
WBGene00021340		Y34F4.5	0.00461618	1.02821
WBGene00007372		C06B8.7	0.000102178	1.03043
WBGene00020867	shc-2	T27F7.2	0.0011663	1.03074
WBGene00012085		T27D12.1	1.3e-05	1.03112
WBGene00009192		F27E5.1	0.000194228	1.03185
WBGene00004198	prx-13	F32A5.6	0.00763698	1.03304
WBGene00018860		F55A4.8	0.00604021	1.03455
WBGene00002038	hum-5	T02C12.1	1.1e-09	1.03604
WBGene00000212	asm-2	ZK455.4	0.0626627	1.03782
WBGene00011517	cgt-1	T06C12.10	0.076014	1.0423
WBGene00001578	ges-1	R12A1.4	0.00310135	1.04374
WBGene00003593	nfm-1	F42A10.2	2.62e-09	1.04445
WBGene00001852	hil-1	C30G7.1	0.042498	1.04454
WBGene00004778	ser-3	K02F2.6	0.00839668	1.04481
WBGene00009156	clec-196	F26D10.12	0.0979004	1.04529
WBGene00017785		F25E5.4	0.00714713	1.04548
WBGene00017447		F14B8.5	1.87e-05	1.0508
WBGene00006948	wrt-2	F52E4.6	0.0409832	1.0509
WBGene00009482		F36G3.1	0.000456329	1.05318
WBGene00016282		C31B8.7	0.0896362	1.05384
WBGene00002146	ipp-5	C09B8.1	0.00124759	1.05427
WBGene00021396	cutl-24	Y38C1AA.5	0.00393285	1.05511
WBGene00022893		ZK1290.13	0.0258157	1.05685
WBGene00002217	klp-4	F56E3.3	2.18e-05	1.05805
WBGene00006956	wrt-10	ZK1290.8	0.0390721	1.05806
WBGene00015981	elt-7	C18G1.2	0.0109964	1.0592
WBGene00003595	ngn-1	Y69A2AR.29	0.0466172	1.0644
WBGene00007322		C05B5.5	0.0809638	1.0653
WBGene00015122		B0302.5	2.13e-07	1.06731
WBGene00009089	jmjd-3.2	F23D12.5	0.0927657	1.06849
WBGene00021148		W10G11.19	0.0124297	1.06898
WBGene00002881	let-756	C05D11.4	0.00829867	1.06904
WBGene00011083	glo-1	R07B1.12	0.0422836	1.06971
WBGene00003377	mls-2	C39E6.4	0.0397924	1.07017
WBGene00014253		ZK1320.3	0.00451015	1.07087
WBGene00004024	php-3	Y75B8A.1	0.000110447	1.07256
WBGene00006696	twk-46	Y39B6A.19	0.021086	1.07414
WBGene00019547		K09C4.1	0.0207951	1.0749
WBGene00001395	fat-3	W08D2.4	2.06e-09	1.07508
WBGene00000463	ceh-43	C28A5.4	0.0199843	1.07527
WBGene00023069	rncs-1	F55A4.9	0.0137201	1.07693
WBGene00013418		Y65A5A.1	0.0199769	1.07727
WBGene00006701	ubc-1	C35B1.1	1.08e-10	1.07946
WBGene00018035	sek-4	F35C8.2	0.0653653	1.07955
WBGene00017335		F10D2.10	0.0325534	1.08002
WBGene00017504		F16B4.2	0.0863317	1.08099
WBGene00017080	lec-12	DC2.3	3.72e-10	1.08477
WBGene00004172	pqn-92	Y75B8A.27	0.000112227	1.08545
WBGene00004855	sma-1	R31.1	4.94e-08	1.08828
WBGene00021044		W05H7.1	9.04e-05	1.08918
WBGene00001330	eps-8	Y57G11C.24	1.01e-12	1.09121
WBGene00001820	ham-1	F53B2.6	0.00498185	1.09173
WBGene00044080		D1086.10	0.0196514	1.09274
WBGene00000051	acr-12	R01E6.4	0.0463613	1.09455
WBGene00019615		K10B4.3	0.000391266	1.09875
WBGene00017908		F28H1.1	0.000193753	1.0996
WBGene00005003	spp-18	F27C8.4	8.25e-06	1.10141
WBGene00000469	ces-2	ZK909.4	0.0213498	1.10346
WBGene00017487		F15E6.6	0.0732601	1.10377
WBGene00016866	coel-1	C52B9.3	0.000388043	1.10434
WBGene00007421		C07H4.1	0.0645655	1.10995
WBGene00020379		T09B4.5	0.00522045	1.11004
WBGene00014821		R10E8.7	0.00177745	1.11729
WBGene00001250	elt-2	C33D3.1	7.86e-06	1.11758
WBGene00016360		C33G8.2	0.0195634	1.11763
WBGene00015956		C18B2.5	9.45e-05	1.11856
WBGene00019748	atg-2	M03A8.2	1.47e-10	1.11883
WBGene00045397		Y54G2A.52	0.0297474	1.11995
WBGene00015966		C18C4.5	1.31e-09	1.12133
WBGene00006454	aex-4	T14G12.2	0.0318559	1.12214
WBGene00019703	fbxb-41	M01D1.8	0.0827899	1.12552
WBGene00020245		T05B11.1	0.000896464	1.12702
WBGene00008498		F01D5.8	0.0160157	1.12944
WBGene00010049		F54D5.3	0.000331289	1.12991
WBGene00007481		C09F9.4	0.019697	1.13316
WBGene00021531		Y42G9A.1	0.000934104	1.13369
WBGene00019724		M02B7.2	2.74e-05	1.13549
WBGene00021768		Y51F10.7	1.08e-05	1.13598
WBGene00185092		K08D8.7	0.0466068	1.13606
WBGene00004037	plc-2	Y75B12B.6	4.9e-06	1.13613
WBGene00001184	egl-15	F58A3.2	0.00206624	1.13615
WBGene00012668		Y39B6A.5	0.00215378	1.13777
WBGene00022349		Y82E9BR.17	0.0179718	1.13904
WBGene00013968		ZK287.9	0.00887915	1.14042
WBGene00022419		Y102A11A.9	0.0657381	1.14121
WBGene00019436		K06A9.2	0.0555409	1.14186
WBGene00015476		C05D9.9	0.00124759	1.14268
WBGene00019751		M03D4.4	0.00282337	1.14327
WBGene00000190	arf-1.1	F45E4.1	0.0958058	1.14403
WBGene00013145	cutl-2	Y53C12B.6	0.0928816	1.14418
WBGene00004898	snb-2	F23H12.1	1.44e-05	1.14573
WBGene00010041		F54C9.3	0.00107657	1.14653
WBGene00006331	sup-26	R10E4.2	4.91e-07	1.14658
WBGene00000238	bar-1	C54D1.6	6.33e-05	1.14734
WBGene00001591	glc-1	F11A5.10	0.0053064	1.14735
WBGene00016719	math-24	C46F9.3	0.0905864	1.14966
WBGene00001345	fos-1	F29G9.4	2.93e-09	1.15147
WBGene00018841		F54H5.5	0.0572639	1.15211
WBGene00022859		ZK1193.3	0.0422836	1.15581
WBGene00013227		Y56A3A.6	7.85e-08	1.16083
WBGene00007748		C26E1.2	0.0652798	1.1623
WBGene00013639		Y105C5A.15	0.00251534	1.16243
WBGene00015107		B0280.13	0.000874851	1.16264
WBGene00009957		F53B2.8	0.084653	1.16313
WBGene00011978		T24B8.4	0.000202643	1.16392
WBGene00015947		C18A11.1	0.0883654	1.16488
WBGene00022951		C30E1.9	2.19e-05	1.16589
WBGene00019955		R08C7.12	1.83e-07	1.16591
WBGene00021834	mab-31	Y54E10A.16	2.75e-12	1.16626
WBGene00002187	kgb-1	T07A9.3	2.05e-06	1.16658
WBGene00023252		C39H7.2	0.0617371	1.1671
WBGene00015716	sox-4	C12D12.5	0.00502706	1.16968
WBGene00019351	lron-7	K03A1.2	1.25e-18	1.17005
WBGene00018823		F54E2.1	0.0986345	1.17061
WBGene00014206	nit-1	ZK1058.6	0.0375487	1.17236
WBGene00012144		T28H10.3	0.0979004	1.17362
WBGene00003978	pes-4	Y119D3B.17	5.11e-10	1.17422
WBGene00010070	nep-17	F54F11.2	2.42e-15	1.17507
WBGene00000458	ceh-37	C37E2.5	2.57e-06	1.17524
WBGene00016542		C39H7.4	0.00589867	1.17662
WBGene00004857	sma-3	R13F6.9	0.0012297	1.17722
WBGene00008255		C51E3.10	0.0896213	1.17762
WBGene00022200	fard-1	Y71H10A.2	5.22e-09	1.17804
WBGene00020833		T26C12.3	0.0278749	1.17895
WBGene00020188		T03F1.6	0.000284897	1.17952
WBGene00045212		Y110A7A.21	0.0137201	1.18024
WBGene00007919		C34C6.7	0.00714713	1.18108
WBGene00014137	clec-187	ZK896.6	7.85e-08	1.18204
WBGene00002139	inx-17	R12E2.4	0.000435288	1.18234
WBGene00020453	fbxa-55	T12B5.6	0.0213498	1.18325
WBGene00016134		C26B9.5	1.71e-05	1.18459
WBGene00007479		C09F9.2	0.0672851	1.18463
WBGene00010746		K10D11.2	0.0916808	1.18468
WBGene00003243	mig-10	F10E9.6	3.24e-06	1.18563
WBGene00020504	svh-2	T14E8.1	1.18e-08	1.18674
WBGene00012127		T28D6.7	0.00825247	1.19054
WBGene00008228		C50B8.6	1.51e-05	1.19059
WBGene00000973	dhs-9	Y32H12A.3	0.00719614	1.19102
WBGene00015455		C04G6.5	0.0883654	1.19775
WBGene00018704	ztf-13	F52E4.8	1.94e-08	1.19826
WBGene00022816	fbn-1	ZK783.1	0.0131652	1.19829
WBGene00019017		F57F4.4	0.0458824	1.20098
WBGene00006930	vit-6	K07H8.6	8.84e-13	1.2038
WBGene00019300	swt-1	K02D7.5	0.0184337	1.20388
WBGene00021927	abhd-14	Y55F3AM.10	0.0144788	1.20431
WBGene00009380		F34H10.3	1.98e-10	1.20441
WBGene00015169		B0403.5	0.0118488	1.20525
WBGene00017448		F14B8.6	1.21e-06	1.20563
WBGene00016104	ddr-1	C25F6.4	0.00153582	1.20716
WBGene00021517		Y41D4B.15	0.0783017	1.20825
WBGene00018646	mul-1	F49F1.6	0.000696663	1.209
WBGene00004013	pha-4	F38A6.1	8.32e-06	1.20943
WBGene00008886		F16C3.2	0.0012579	1.20947
WBGene00016663		C45E1.4	0.00190423	1.2098
WBGene00001918	his-44	F08G2.1	0.0467449	1.21171
WBGene00001889	his-15	ZK131.9	0.0467449	1.21171
WBGene00006366	sym-1	C44H4.3	0.00265996	1.21264
WBGene00019858		R03H10.6	0.0583704	1.21273
WBGene00000503	cht-1	C04F6.3	7.6e-05	1.21577
WBGene00019404		K05B2.4	0.0114544	1.21907
WBGene00021121		W09G12.7	0.0103234	1.21956
WBGene00012819		Y43F8B.9	0.0244668	1.22064
WBGene00007180		B0457.6	4.26e-07	1.2245
WBGene00012140		T28F4.5	1.12e-05	1.22458
WBGene00044607		K02A11.4	0.0753551	1.22556
WBGene00001899	his-25	ZK131.2	0.0490894	1.22719
WBGene00009213	thn-1	F28D1.3	0.0610463	1.22743
WBGene00018374	tag-343	F43B10.2	0.000113299	1.22884
WBGene00011090		R07B7.6	0.000115495	1.23033
WBGene00005931	fbxa-199	T06E6.3	0.0592721	1.23278
WBGene00019780		M60.4	2.25e-07	1.23441
WBGene00009430		F35E12.6	2.47e-07	1.23481
WBGene00012462		Y17G7B.8	0.00137022	1.23914
WBGene00006063	sto-1	F08C6.4	8.09e-07	1.2406
WBGene00012101	zip-10	T27F2.4	0.0682103	1.24216
WBGene00007872		C32H11.9	0.0531815	1.24443
WBGene00007694		C23H4.6	0.00264259	1.24522
WBGene00023021		F32A5.9	0.00451755	1.24777
WBGene00010834	mct-3	M03B6.2	0.000182392	1.24791
WBGene00015859		C16D9.4	0.0672851	1.24967
WBGene00016888		C52E12.1	3.7e-20	1.25042
WBGene00018601		F48C1.9	0.0626063	1.26279
WBGene00016735	fhod-1	C46H11.11	6.38e-07	1.26344
WBGene00008101		C44H9.6	1.64e-07	1.26638
WBGene00018398	sptl-2	F43H9.2	1.04e-09	1.26834
WBGene00001577	gem-4	T12A7.1	8.54e-05	1.26863
WBGene00005649	srp-8	F20D6.3	0.0592721	1.26936
WBGene00015955		C18B2.4	1.28e-09	1.27028
WBGene00010795		M01A8.1	0.0104109	1.27223
WBGene00006926	vit-2	C42D8.2	3.05e-10	1.27362
WBGene00000218	asp-5	F21F8.3	2.45e-08	1.27552
WBGene00016088	clec-266	C25B8.4	0.000305323	1.27641
WBGene00012444		Y15E3A.5	2.03e-05	1.27667
WBGene00017434		F13H8.1	0.00145732	1.27675
WBGene00007857		C31H5.6	0.000327707	1.27968
WBGene00003705	nhr-115	T27B7.4	0.0307877	1.28037
WBGene00018153		F37C12.10	0.0419787	1.28407
WBGene00000067	act-5	T25C8.2	3.43e-06	1.28432
WBGene00001828	hch-1	F40E10.1	0.00306315	1.2847
WBGene00013100	zip-7	Y51H4A.4	0.0116655	1.28585
WBGene00012028	srz-99	T25E12.13	0.0377723	1.28613
WBGene00009692		F44E5.5	0.0561551	1.28908
WBGene00000449	ceh-27	F46F3.1	0.00206945	1.2915
WBGene00006798	unc-64	F56A8.7	5.74e-12	1.29197
WBGene00019869	cnnm-2	R04E5.2	0.000537223	1.29461
WBGene00002234	kqt-2	M60.5	3.6e-07	1.29465
WBGene00003903	pab-2	F18H3.3	7.23e-09	1.29653
WBGene00012548		Y37D8A.6	3.9e-07	1.29789
WBGene00019579	oac-57	K09E10.1	0.00774225	1.29937
WBGene00016061	hpo-15	C24G6.6	6.25e-12	1.2998
WBGene00009971		F53C11.1	0.0537945	1.29985
WBGene00006467	magu-2	C01B7.4	0.000327707	1.30042
WBGene00012306		W06F12.2	5.11e-11	1.30162
WBGene00010127		F55G11.7	0.0456047	1.30279
WBGene00007365		C06B3.6	0.0086333	1.30419
WBGene00004929	soc-2	AC7.2	2.86e-09	1.30427
WBGene00022735		ZK418.6	0.00120839	1.30886
WBGene00044418		C08G5.7	9.2e-05	1.31072
WBGene00019215		H20E11.3	0.00051276	1.31183
WBGene00021118	clec-125	W09G10.6	0.0429505	1.31234
WBGene00021576	fbxc-51	Y46B2A.1	0.00028968	1.31331
WBGene00194726		R13A5.15	0.0332255	1.31758
WBGene00000522	clc-1	C09F12.1	0.036305	1.31774
WBGene00019327	zip-2	K02F3.4	4.3e-14	1.31837
WBGene00000208	asc-1	Y53F4B.15	1.62e-10	1.32051
WBGene00019166	tat-2	H06H21.10	9.86e-07	1.32713
WBGene00001132	alp-1	T11B7.4	3.12e-10	1.33099
WBGene00006650	tts-1	F09E10.11	0.00697008	1.33345
WBGene00019957		R08E3.1	5.02e-14	1.33437
WBGene00019617		K10C2.1	0.0153053	1.33438
WBGene00022860		ZK1193.4	0.0107566	1.33521
WBGene00077770		M04D5.3	0.0148914	1.33766
WBGene00006929	vit-5	C04F6.1	2.34e-10	1.34033
WBGene00001854	hil-3	F22F1.1	2.81e-05	1.34533
WBGene00010453	fozi-1	K01B6.1	0.000700986	1.34554
WBGene00001768	gst-20	Y48E1B.10	0.00115683	1.34603
WBGene00008229		C50F4.1	2.22e-06	1.35037
WBGene00020205	arrd-1	T04B8.3	0.00311198	1.35807
WBGene00008483		E04D5.4	0.0284681	1.35814
WBGene00006533	tba-7	T28D6.2	0.037816	1.36052
WBGene00006971	zak-1	R13F6.6	4.74e-05	1.36147
WBGene00002272	lec-9	C16H3.2	4.9e-06	1.36158
WBGene00044743	crb-3	C35B8.4	4.56e-05	1.36314
WBGene00013898		ZC443.3	6.2e-06	1.36654
WBGene00006575	tir-1	F13B10.1	4.97e-14	1.36703
WBGene00011978		T24B8.4	2.26e-12	1.3684
WBGene00015259	dod-20	B0554.6	0.0191504	1.37114
WBGene00021495	sqst-2	Y40C5A.1	0.0106529	1.37187
WBGene00013080		Y51A2D.13	2.57e-06	1.37359
WBGene00015085		B0244.10	0.000335472	1.37607
WBGene00021397		Y38C1AA.6	0.0188908	1.37773
WBGene00013189		Y54E2A.4	5.86e-27	1.38035
WBGene00023345		T12B5.9	0.0215049	1.38044
WBGene00007866		C32H11.3	0.0175837	1.38052
WBGene00002056	ifc-2	M6.1	1.78e-25	1.38121
WBGene00007873	dod-21	C32H11.10	0.031492	1.38134
WBGene00022196	gpa-17	Y71H2B.7	3.85e-07	1.38309
WBGene00019373		K04A8.1	1.07e-05	1.38354
WBGene00001208	egl-44	F28B12.2	2.6e-16	1.38359
WBGene00015079		B0244.4	0.0271763	1.38498
WBGene00010328		F59C6.11	0.0142648	1.38562
WBGene00017726		F22H10.2	0.0332615	1.38585
WBGene00022346		Y82E9BR.13	0.0106903	1.38844
WBGene00010723	cpg-7	K09E4.6	0.00124759	1.39182
WBGene00006946	prx-10	C34E10.4	0.0286076	1.39283
WBGene00007317		C05A9.2	0.000148731	1.39482
WBGene00018210		F39G3.5	1.16e-05	1.39482
WBGene00007932	zip-5	C34D1.5	8.23e-06	1.3997
WBGene00015680	egal-1	C10G6.1	4.31e-07	1.40383
WBGene00017892		F28B4.3	4.72e-19	1.40534
WBGene00011856		T20D3.2	3.33e-07	1.407
WBGene00013755	fbxa-115	Y113G7B.3	0.000696663	1.40817
WBGene00017302		F09F7.5	7.55e-12	1.41035
WBGene00009434		F35E12.10	1.54e-08	1.4142
WBGene00017786		F25E5.5	3.51e-07	1.41825
WBGene00006372	syx-2	F48F7.2	1.16e-08	1.41999
WBGene00018237	drd-2	F40F4.6	1.14e-26	1.42016
WBGene00009743	sptf-1	F45H11.1	0.000660266	1.42208
WBGene00017971		F32A5.8	1.26e-06	1.42248
WBGene00044776		T02B11.8	0.00456583	1.42526
WBGene00012005	jun-1	T24H10.7	8.59e-10	1.4259
WBGene00018274		F41C3.8	0.00114314	1.43195
WBGene00000216	asp-3	H22K11.1	2.49e-07	1.43541
WBGene00012018		T25C12.3	5.01e-15	1.43542
WBGene00010597		K06A4.7	2.9e-07	1.43923
WBGene00022848		ZK1055.7	0.0204126	1.43929
WBGene00020158		T02C5.1	3.71e-13	1.43984
WBGene00010657		K08D8.3	7.47e-05	1.44465
WBGene00018946		F56C3.9	0.0204482	1.44582
WBGene00008372		D1054.5	1.27e-06	1.44751
WBGene00010150		F56D5.6	0.00226543	1.45318
WBGene00019213		H20E11.1	0.00343438	1.45468
WBGene00008255		C51E3.10	0.000416465	1.45568
WBGene00003148	mbf-1	H21P03.1	4e-23	1.45664
WBGene00002057	ifd-1	R04E5.10	3.63e-06	1.4598
WBGene00021339		Y34F4.4	0.0153606	1.45985
WBGene00017964		F31F7.1	4.2e-20	1.45998
WBGene00001983	hoe-1	E04A4.4	8e-18	1.46089
WBGene00002054	ifb-2	F10C1.7	1.56e-22	1.46185
WBGene00007864		C32H11.1	0.00241617	1.46525
WBGene00007453	fbxa-98	C08F11.5	0.00585965	1.46699
WBGene00016332		C32F10.4	0.000275908	1.47388
WBGene00045461		C25F9.14	0.00308692	1.47898
WBGene00009093		F23H12.3	0.00028124	1.47936
WBGene00008368		D1053.3	0.000356796	1.47976
WBGene00010605		K06G5.1	3.29e-08	1.48384
WBGene00008599		F09A5.2	4.64e-07	1.48453
WBGene00001898	his-24	M163.3	9.44e-06	1.48488
WBGene00015693	ugt-28	C10H11.4	8.73e-08	1.48892
WBGene00004096	pqm-1	F40F8.7	3.24e-11	1.49566
WBGene00020972	trpl-2	W03B1.2	0.000663117	1.49856
WBGene00001778	gst-30	ZK546.11	0.0103431	1.49864
WBGene00020801		T25D10.4	6.52e-13	1.50135
WBGene00004796	sid-2	ZK520.2	0.000205546	1.50141
WBGene00020222	fut-6	T05A7.5	1.41e-07	1.50229
WBGene00016547		C40A11.4	0.0120125	1.50962
WBGene00021253		Y22D7AL.15	0.0137201	1.51222
WBGene00015933		C17H12.8	0.0108497	1.51389
WBGene00007726		C25F9.6	0.00980104	1.51426
WBGene00013119		Y51H4A.25	8.78e-07	1.51435
WBGene00007593		C14H10.3	8.72e-17	1.51521
WBGene00012624	fbxa-150	Y38H6C.11	1.89e-06	1.51579
WBGene00021325		Y34B4A.9	2.95e-10	1.51811
WBGene00019532		K08D10.9	0.0146174	1.52057
WBGene00016585	oac-59	C42C1.7	1.34e-06	1.5225
WBGene00045411		C25F9.11	0.0135383	1.52265
WBGene00000480	cgp-1	Y38C9A.2	3.52e-38	1.52303
WBGene00001169	eef-1A.2	R03G5.1	4.31e-11	1.52306
WBGene00020788	nep-22	T25B6.2	1.91e-05	1.52366
WBGene00020456	fbxa-60	T12B5.10	0.000456329	1.52433
WBGene00009429		F35E12.5	1.42e-12	1.52682
WBGene00000214	asp-1	Y39B6A.20	3.32e-11	1.52862
WBGene00022330	fbxa-80	Y82E9BL.14	0.000617774	1.52933
WBGene00006923	vhp-1	F08B1.1	2.93e-17	1.53191
WBGene00011182		R09H10.5	5.85e-24	1.53278
WBGene00016865	ets-9	C52B9.2	2.12e-07	1.53849
WBGene00021805		Y53G8AM.5	0.012679	1.53916
WBGene00017591		F19C7.1	5.09e-11	1.54007
WBGene00013119		Y51H4A.25	3.86e-05	1.54384
WBGene00016997	cebp-1	D1005.3	7.22e-06	1.54563
WBGene00010899		M28.8	1.55e-17	1.54722
WBGene00007867		C32H11.4	0.0111524	1.55192
WBGene00006649	tth-1	F08F1.8	8.62e-07	1.55291
WBGene00006650	tts-1	F09E10.11	3.15e-09	1.55418
WBGene00006470	tag-120	F40F9.2	0.000481424	1.55436
WBGene00018939	fbxa-190	F56C3.2	0.00181943	1.56081
WBGene00015597	fbxa-162	C08E3.5	0.0112422	1.56426
WBGene00002188	kgb-2	ZC416.4	0.0034691	1.56609
WBGene00206354		F27E5.9	0.0108981	1.56652
WBGene00020325	bath-46	T07H3.2	0.0064988	1.57091
WBGene00008149	pyp-1	C47E12.4	1.25e-21	1.57502
WBGene00007320		C05B5.2	0.00620295	1.58221
WBGene00013197	ttm-5	Y54E5A.1	7.65e-10	1.58295
WBGene00012554		Y37D8A.16	5.57e-11	1.58425
WBGene00018997		F57B9.3	0.00953726	1.58485
WBGene00022331	fbxa-19	Y82E9BL.15	0.0025755	1.58865
WBGene00000219	asp-6	F21F8.7	3.52e-10	1.59084
WBGene00004405	rop-1	C12D8.11	1.88e-30	1.59685
WBGene00021178		Y9C9A.8	0.00779644	1.59736
WBGene00007414		C07E3.3	0.000274711	1.60218
WBGene00012810	nceh-1	Y43F8A.3	0.00108075	1.60312
WBGene00019435		K06A9.1	9.39e-21	1.60543
WBGene00219770	linc-40	Y82E9BL.20	3.91e-06	1.60557
WBGene00015791		C15C7.5	1.21e-28	1.60626
WBGene00015100		B0280.2	0.0043379	1.60808
WBGene00206380		C42D4.18	5.73e-05	1.60808
WBGene00021260		Y22D7AR.6	7.72e-08	1.61517
WBGene00019261		H34I24.2	2.98e-20	1.61623
WBGene00044166		C54C6.7	0.00470601	1.62602
WBGene00010850		M04C3.1	4.5e-07	1.6267
WBGene00013119		Y51H4A.25	0.00498185	1.627
WBGene00008944		F19B2.5	0.00316771	1.62926
WBGene00012280		W05E10.1	0.000256326	1.63219
WBGene00003607	nhr-8	F33D4.1	1.09e-14	1.63252
WBGene00021583	clec-72	Y46C8AL.5	8.46e-05	1.634
WBGene00015295	acl-12	C01C10.3	6.69e-08	1.63571
WBGene00044280		W02A2.9	0.0011878	1.63927
WBGene00008227		C50B8.5	0.000123333	1.64041
WBGene00001441	fkh-9	K03C7.2	2.18e-17	1.65147
WBGene00010050		F54D5.4	6.42e-07	1.65184
WBGene00003907	paf-2	C52B9.7	4.27e-05	1.65606
WBGene00021585	clec-74	Y46C8AL.8	0.00210208	1.66117
WBGene00002041	hum-8	Y66H1A.6	1.22e-19	1.66733
WBGene00017727		F22H10.3	1.51e-10	1.67674
WBGene00194742		F37C12.21	0.00475133	1.67897
WBGene00015081		B0244.6	9.98e-07	1.68197
WBGene00009403		F35C11.4	2.51e-09	1.68256
WBGene00019645	swt-7	K11D12.5	4.85e-13	1.68563
WBGene00008019		C38H2.2	7.57e-30	1.68854
WBGene00016425		C34H4.2	0.00274464	1.68868
WBGene00012494	nhr-232	Y22F5A.1	6.38e-07	1.69424
WBGene00007875	dod-24	C32H11.12	0.000700986	1.69838
WBGene00013009	fbxc-23	Y48E1B.11	0.0011162	1.70072
WBGene00007716	fbxa-82	C25D7.4	0.00121907	1.70405
WBGene00011213		R10E8.8	5.69e-05	1.70774
WBGene00016379		C33H5.13	3.24e-05	1.71084
WBGene00010851		M04C3.2	0.00014744	1.71568
WBGene00018724		F53A9.1	6.11e-06	1.71643
WBGene00195026		F39E9.19	4.94e-08	1.7181
WBGene00017484		F15E6.3	6.45e-05	1.72838
WBGene00021519		Y41D4B.17	4.18e-11	1.7331
WBGene00004131	pqn-44	F55A12.9	2.92e-28	1.73497
WBGene00004002	pgp-8	T21E8.3	0.0012297	1.736
WBGene00012201		W02B12.1	7.26e-10	1.7365
WBGene00001754	gst-6	F11G11.3	0.000112014	1.75272
WBGene00003480	klf-3	F54H5.4	5.7e-25	1.76088
WBGene00020740		T23F4.2	1.99e-09	1.76198
WBGene00006627	tsp-1	C02F5.8	0.00265996	1.7676
WBGene00194713		F19B10.13	0.00241915	1.76969
WBGene00007153	clec-41	B0365.6	1.78e-08	1.77138
WBGene00015479	wht-1	C05D10.3	0.000608011	1.77453
WBGene00010125	dod-22	F55G11.5	0.00157649	1.77538
WBGene00009798		F46G10.4	1.19e-09	1.77581
WBGene00009433		F35E12.9	6.13e-06	1.77668
WBGene00077764		F59C6.16	1.54e-08	1.78096
WBGene00019682		K12H4.7	1.89e-14	1.78256
WBGene00009023		F21G4.1	8.3e-10	1.78347
WBGene00014138	clec-186	ZK896.7	2.57e-09	1.78706
WBGene00009394	clec-63	F35C5.6	4.85e-11	1.79067
WBGene00019967	cyp-33C8	R08F11.3	3.78e-10	1.79491
WBGene00016769		C49C8.5	1.37e-14	1.79571
WBGene00011894	ttr-23	T21C9.8	0.000193753	1.79572
WBGene00022327	fbxa-15	Y82E9BL.11	9.69e-05	1.80135
WBGene00022033		Y65B4BL.1	2.97e-09	1.80144
WBGene00015280		C01B10.6	1.36e-26	1.80988
WBGene00008091		C44F1.1	1.31e-06	1.81436
WBGene00016218		C29F9.3	6.14e-08	1.81607
WBGene00021879	clec-83	Y54G2A.14	2.8e-14	1.81947
WBGene00019273		H43E16.1	0.000496481	1.82431
WBGene00019068	faah-3	F58H7.2	1.91e-11	1.82533
WBGene00008486	ugt-44	F01D4.2	1.49e-15	1.82573
WBGene00012529		Y32F6A.4	5.67e-07	1.83639
WBGene00003640	nhr-50	C06C6.5	4.89e-08	1.83669
WBGene00004169	pqn-89	Y73B6BR.1	3.96e-12	1.84038
WBGene00002274	lec-11	F38A5.3	0.000716376	1.84598
WBGene00021020		W04B5.3	6.36e-13	1.84879
WBGene00022142		Y71G12B.2	0.000721809	1.85826
WBGene00015598	fbxa-163	C08E3.6	0.00126322	1.85991
WBGene00015167		B0403.3	7.42e-05	1.86153
WBGene00019973		R09A1.3	5.98e-05	1.86549
WBGene00010658		K08D8.4	0.000332699	1.86666
WBGene00015389	scav-1	C03F11.3	1.11e-28	1.87032
WBGene00002174	itx-1	W03D8.6	1.19e-14	1.87035
WBGene00001581	gfi-1	F57F4.3	6.48e-05	1.8709
WBGene00022736		ZK418.7	1.08e-07	1.87455
WBGene00010047		F54D1.6	1.09e-14	1.87699
WBGene00003561	ncr-1	F02E8.6	1.45e-25	1.87717
WBGene00009393	clec-62	F35C5.5	2.62e-09	1.87951
WBGene00021635		Y47G6A.5	2.1e-13	1.88121
WBGene00010977		R02D5.3	0.000132256	1.8831
WBGene00014132		ZK896.1	1.72e-05	1.88493
WBGene00017093		E02C12.8	0.000220353	1.88681
WBGene00018729		F53A9.6	8.81e-06	1.88772
WBGene00019213		H20E11.1	4.71e-14	1.8957
WBGene00016379		C33H5.13	7.73e-07	1.89979
WBGene00019958		R08E3.2	1.06e-11	1.90589
WBGene00005141	srd-64	Y22D7AR.8	0.000738434	1.90879
WBGene00003090	lys-1	Y22F5A.4	1.74e-10	1.92221
WBGene00004003	pgp-9	C47A10.1	2.61e-05	1.92373
WBGene00077525		C41G7.8	0.000464542	1.92886
WBGene00006680	twk-28	C52B9.6	3.32e-07	1.92922
WBGene00008922		F17C11.11	1.42e-08	1.93695
WBGene00011076	scav-5	R07B1.3	4.06e-12	1.94597
WBGene00008726		F13A7.11	4.74e-06	1.96671
WBGene00022494	fbxa-91	Y119D3B.18	3.55e-05	1.96682
WBGene00018984		F56F10.1	1.43e-19	1.97289
WBGene00045507		F10A3.17	1.5e-09	1.98588
WBGene00044468		Y69A2AL.2	7.16e-11	1.98904
WBGene00021197		Y17G9A.4	7.43e-06	1.99056
WBGene00014164	lact-2	ZK945.1	1.28e-10	1.99274
WBGene00021354	fpn-1.1	Y37E3.16	3.41e-11	2.01577
WBGene00010128		F55G11.8	6.6e-06	2.02701
WBGene00015713		C12D12.1	1.88e-63	2.03416
WBGene00002273	lec-10	W01A11.4	3.58e-12	2.03606
WBGene00011957		T23F11.6	5.98e-05	2.03746
WBGene00019779		M60.2	5.58e-14	2.03747
WBGene00194926		K08D8.12	0.00011117	2.04912
WBGene00018707	oac-31	F52F10.3	2.35e-05	2.04963
WBGene00010475		K01F9.2	6.61e-11	2.05257
WBGene00019644	cpt-4	K11D12.4	1.4e-10	2.05372
WBGene00011938	alh-13	T22H6.2	5.18e-09	2.0651
WBGene00014063	clec-143	ZK673.9	0.000170513	2.08171
WBGene00017199	clec-45	F07C4.2	0.000181848	2.08204
WBGene00015823		C16B8.3	3.64e-14	2.0842
WBGene00009724		F45D3.4	1.04e-14	2.08615
WBGene00009431	dct-17	F35E12.7	8.17e-17	2.09575
WBGene00009710		F44G3.10	0.000165692	2.09747
WBGene00011844		T19C9.8	8.54e-05	2.09755
WBGene00018350	ifo-1	F42C5.10	1.5e-14	2.09772
WBGene00016958	ilys-4	C55F2.2	3.62e-14	2.11079
WBGene00015048	faah-2	B0218.2	3.78e-11	2.11201
WBGene00016219		C29F9.4	8.3e-11	2.11916
WBGene00022486	fbxa-61	Y119D3B.8	1.19e-05	2.13663
WBGene00000562	cng-1	F14H8.6	6.14e-08	2.14262
WBGene00000022	abt-4	Y39D8C.1	3.87e-55	2.14496
WBGene00010745	dod-17	K10D11.1	1.21e-08	2.14578
WBGene00000191	arl-7	F20D1.5	2.5e-06	2.1498
WBGene00022329	fbxa-79	Y82E9BL.13	1.72e-06	2.15052
WBGene00002058	ifd-2	F25E2.4	3.85e-35	2.16156
WBGene00003702	nhr-112	Y70C5C.6	7.42e-06	2.17248
WBGene00009433		F35E12.9	1.18e-09	2.17314
WBGene00003091	lys-2	Y22F5A.5	4.65e-05	2.17387
WBGene00007833	oac-6	C31A11.5	3.64e-09	2.17877
WBGene00008632	fbxa-88	F10A3.2	3.63e-05	2.18536
WBGene00009914		F49H6.13	5.19e-05	2.19972
WBGene00007689		C18E9.9	2.26e-14	2.20253
WBGene00016785		C49G7.7	4.91e-05	2.22423
WBGene00010660		K08D8.6	1.73e-13	2.22446
WBGene00000783	cpr-3	T10H4.12	3.69e-05	2.23021
WBGene00012532	crp-1	Y32F6B.3	2.91e-29	2.23163
WBGene00022593		ZC328.3	3.22e-37	2.23166
WBGene00022847		ZK1055.6	1.42e-10	2.2381
WBGene00003653	nhr-63	C06C6.4	1.38e-08	2.24051
WBGene00003648	nhr-58	R11G11.2	1.04e-09	2.2464
WBGene00012622		Y38H6C.9	1.62e-06	2.25215
WBGene00010749		K10D11.5	7.54e-12	2.25259
WBGene00008498		F01D5.8	1.58e-05	2.25886
WBGene00019170		H06I04.6	8.16e-25	2.26093
WBGene00005833	srw-86	C25F9.7	1.97e-05	2.27866
WBGene00011737	sqst-1	T12G3.1	2.45e-18	2.28938
WBGene00022496	fbxa-92	Y119D3B.20	3.92e-09	2.29482
WBGene00013947		ZK228.4	3.43e-23	2.3048
WBGene00015965	ugt-48	C18C4.3	2.44e-17	2.32037
WBGene00010935		M163.1	3.04e-62	2.33063
WBGene00014135		ZK896.4	1.73e-24	2.3385
WBGene00019738	clec-265	M02F4.7	5.56e-06	2.36741
WBGene00009396	clec-65	F35C5.8	1.63e-15	2.39472
WBGene00018839		F54H5.2	5.06e-07	2.41278
WBGene00021435		Y39A3A.4	3.51e-07	2.41327
WBGene00017905		F28F5.6	2.78e-14	2.4234
WBGene00018971	clec-67	F56D6.2	3.41e-06	2.43507
WBGene00021518	hpo-6	Y41D4B.16	5.02e-22	2.44354
WBGene00013559		Y75B8A.28	1.02e-10	2.44966
WBGene00003092	lys-3	Y22F5A.6	1.16e-06	2.45001
WBGene00013845	fbxa-37	ZC47.14	4.25e-19	2.45101
WBGene00044681		T24C4.8	9.5e-08	2.45973
WBGene00022326	fbxa-14	Y82E9BL.10	2.54e-20	2.46741
WBGene00000841	cul-6	K08E7.7	5.85e-12	2.46853
WBGene00007835	oac-7	C31A11.7	2.27e-09	2.49893
WBGene00018562		F47D12.6	1.55e-17	2.53589
WBGene00017678	asp-12	F21F8.4	5.88e-13	2.54654
WBGene00021556		Y45G5AM.3	7.94e-20	2.57613
WBGene00012622		Y38H6C.9	9.96e-07	2.58821
WBGene00011445		T04F8.7	2.99e-28	2.60647
WBGene00044402		Y82E9BL.18	1.34e-09	2.63502
WBGene00010658		K08D8.4	1.48e-39	2.65179
WBGene00008900		F16H6.10	2.18e-07	2.6535
WBGene00010658		K08D8.4	8.63e-26	2.66925
WBGene00013842	fbxa-34	ZC47.10	1.56e-10	2.6798
WBGene00020579		T19D12.4	1.17e-07	2.6861
WBGene00010659		K08D8.5	1.06e-12	2.73991
WBGene00003006	lin-17	Y71F9B.5	1.16e-07	2.76243
WBGene00018966		F56D2.5	7.07e-18	2.78353
WBGene00012464	arrd-7	Y17G7B.11	1.54e-28	2.7986
WBGene00009397	clec-66	F35C5.9	1.38e-08	2.80169
WBGene00206489		F53F1.14	3.1e-11	2.81109
WBGene00013841	fbxa-33	ZC47.9	1.36e-11	2.82427
WBGene00010126		F55G11.6	6.83e-09	2.8283
WBGene00006628	tsp-2	C02F5.11	2.84e-10	2.84822
WBGene00000373	cyp-14A5	F08F3.7	7.63e-28	2.87316
WBGene00015695	ugt-26	C10H11.6	1.25e-18	2.89057
WBGene00018874	tag-234	F55C12.7	7.11e-15	2.90149
WBGene00044073	tag-244	C34H4.3	3.96e-27	2.93313
WBGene00012824		Y43F8B.14	7.72e-11	2.9387
WBGene00000795	crn-2	CD4.2	6.4e-57	2.9739
WBGene00001770	gst-22	F21H7.1	7.81e-22	2.99603
WBGene00021978		Y58A7A.4	2.84e-11	2.99999
WBGene00003605	nhr-6	C48D5.1	6.21e-42	3.00211
WBGene00018725	kreg-1	F53A9.2	2.78e-14	3.03881
WBGene00011330		T01D3.6	1.48e-44	3.05974
WBGene00021709	ugt-29	Y49C4A.8	1.1e-37	3.06115
WBGene00020760		T24C4.4	1.21e-09	3.07012
WBGene00016577	clec-3	C41H7.7	9.02e-17	3.17601
WBGene00194803		C25F9.16	1.56e-10	3.18407
WBGene00009488	oac-20	F36G9.12	1.37e-63	3.21721
WBGene00022570	sdz-35	ZC239.12	2.22e-12	3.32719
WBGene00009432	cld-9	F35E12.8	2.28e-34	3.40559
WBGene00016762	ugt-24	C49A9.8	1.26e-45	3.40663
WBGene00219709	linc-37	K02F3.14	2.14e-14	3.40911
WBGene00010822		M01G12.9	5.33e-52	3.44477
WBGene00019146		H02F09.3	1.25e-60	3.47004
WBGene00023423		F43C1.7	1.12e-13	3.49091
WBGene00017466		F14F9.3	6.42e-13	3.49922
WBGene00008476		E03H4.8	8.17e-41	3.51556
WBGene00020580		T19D12.5	1.38e-18	3.52249
WBGene00010019		F54B8.4	6.54e-22	3.53246
WBGene00021520		Y41D4B.18	1.45e-25	3.54293
WBGene00016788		C49G7.10	3.1e-51	3.60841
WBGene00008105		C45B11.2	8.12e-21	3.64649
WBGene00014136		ZK896.5	5.7e-26	3.65243
WBGene00012450		Y17D7B.2	2.28e-21	3.69045
WBGene00021262	fbxa-74	Y22D7AR.9	3.9e-65	3.75334
WBGene00007506		C10C5.2	1.84e-22	3.80345
WBGene00010123		F55G11.2	9.08e-38	3.85584
WBGene00001817	haf-7	Y50E8A.16	4.52e-62	3.85699
WBGene00001786	gst-38	F35E8.8	2.88e-29	3.90415
WBGene00021977		Y58A7A.3	2.37e-46	3.91604
WBGene00019564		K09D9.1	9.11e-42	3.94056
WBGene00016424		C34H4.1	1.11e-39	4.00468
WBGene00015932		C17H12.6	1.36e-30	4.02253
WBGene00007717		C25D7.5	1.96e-36	4.09482
WBGene00009428		F35E12.4	2.01e-45	4.13682
WBGene00044457		C18H7.11	8.43e-42	4.22405
WBGene00017467		F14F9.4	5.4e-117	4.23832
WBGene00011799		T16G1.5	2.77e-40	4.34616
WBGene00013900	ugt-18	ZC443.5	4.76e-49	4.37748
WBGene00008577		F08G2.5	2.48e-72	4.61825
WBGene00012923	fbxa-128	Y47D3A.2	5.99e-102	4.62174
WBGene00016783	irg-2	C49G7.5	2.72e-38	4.65169
WBGene00019659		K11H12.3	1.01e-33	4.69452
WBGene00020747		T24A6.7	1.81e-30	4.69973
WBGene00012451		Y17D7B.3	3.02e-29	4.86139
WBGene00021979		Y58A7A.5	7.54e-46	4.94756
WBGene00011494		T05F1.9	2.2e-36	5.00655
WBGene00012583	clec-4	Y38E10A.5	9.37e-56	5.02041
WBGene00021464	ugt-31	Y39G10AR.6	2.85e-123	5.24274
WBGene00000562	cng-1	F14H8.6	3.09e-39	5.49524
WBGene00018760	irg-3	F53E10.4	2.09e-92	5.59881
WBGene00077593		C49G7.12	4.13e-79	5.63261
WBGene00004000	pgp-6	T21E8.1	1.9e-273	6.01488
WBGene00015574	irg-1	C07G3.2	5.28e-110	6.14341
WBGene00019660		K11H12.4	5e-113	6.31688
WBGene00007366		C06B3.7	4.43e-104	6.41846
WBGene00004001	pgp-7	T21E8.2	1.31e-87	6.53647
WBGene00003999	pgp-5	C05A9.1	0	6.75228
WBGene00018708	oac-32	F52F10.4	1.92e-153	6.79406
WBGene00004052	parg-2	H23L24.5	1.13e-121	7.27204

## Sheet: control DOWN PA14
wormbase_id	geane_name	sequence	padj	log2FoldChange
WBGene00007947		C35A5.3	1.97e-44	-4.2848
WBGene00018138	folt-2	F37B4.7	5.51e-112	-3.98556
WBGene00015894	acdh-2	C17C3.12	1.53e-31	-3.90809
WBGene00012608		Y38F1A.6	1.93e-98	-3.52814
WBGene00007422	ugt-17	C08B6.1	1.39e-30	-3.47661
WBGene00004062	pmp-5	T10H9.5	3.22e-44	-3.46939
WBGene00009221	acs-2	F28F8.2	7.18e-28	-3.42246
WBGene00013007		Y48E1B.8	3.31e-16	-3.37339
WBGene00015623		C09B8.4	1.02e-20	-3.26212
WBGene00045275		F18E3.12	8e-13	-3.1914
WBGene00005444	srh-237	T05E12.7	1.18e-13	-3.0107
WBGene00044107		F58G6.9	3.93e-12	-3.01033
WBGene00016943	acdh-1	C55B7.4	5.96e-78	-2.96832
WBGene00015279		C01B10.4	3.03e-08	-2.88092
WBGene00011753		T13F3.6	1.44e-09	-2.87373
WBGene00002055	ifc-1	F37B4.2	2.2e-24	-2.84271
WBGene00008205	sams-1	C49F5.1	3.28e-69	-2.83242
WBGene00017565	ddo-2	F18E3.7	1.85e-29	-2.7912
WBGene00017567		F18E3.11	5.63e-12	-2.75731
WBGene00017881	asp-13	F28A12.4	2.36e-47	-2.7121
WBGene00017658		F21C10.9	1.79e-11	-2.70985
WBGene00008341	ttr-44	C56A3.2	1.98e-26	-2.68899
WBGene00008560	pho-13	F07H5.9	9.44e-13	-2.60785
WBGene00003704	nhr-114	Y45G5AM.1	8.22e-21	-2.56857
WBGene00017485		F15E6.4	6.03e-11	-2.56525
WBGene00045276		F18E3.13	1.01e-15	-2.54759
WBGene00016942		C55B7.3	2e-08	-2.52622
WBGene00006404	tag-10	C31C9.1	4.74e-43	-2.51461
WBGene00017962	fbxa-72	F31F4.15	1.74e-19	-2.48514
WBGene00009334		F32D8.12	2.08e-41	-2.47494
WBGene00021335	spp-23	Y34D9A.11	1.65e-12	-2.41051
WBGene00000722	col-149	B0024.1	8.38e-09	-2.35388
WBGene00003511	mxl-3	F46G10.6	7.81e-23	-2.31964
WBGene00016027		C23H5.8	3.42e-26	-2.30144
WBGene00000988	dhs-25	F09E10.3	1.08e-43	-2.30067
WBGene00043302		F32D8.11	1.25e-10	-2.25618
WBGene00045399		Y47G6A.33	1.04e-25	-2.24153
WBGene00011112		R07E5.4	2.95e-20	-2.2178
WBGene00011487		T05E12.6	1.92e-27	-2.12118
WBGene00001068	dpy-6	F16F9.2	1.13e-06	-2.11581
WBGene00016644	abhd-3.2	C44C1.5	1.22e-12	-2.08036
WBGene00003077	lsm-3	Y62E10A.12	3.19e-08	-2.07308
WBGene00014057		ZK673.1	1.08e-07	-2.04585
WBGene00012538		Y37A1B.5	1.32e-30	-2.01037
WBGene00014003		ZK593.3	1.37e-05	-2.00529
WBGene00001155	ech-6	T05G5.6	3.22e-44	-1.99819
WBGene00009518	clec-166	F38A1.5	4.85e-05	-1.97871
WBGene00013904	ugt-6	ZC455.4	4.06e-05	-1.97385
WBGene00019495	sdz-24	K07E8.3	8.58e-06	-1.9218
WBGene00019208	lips-14	H17B01.3	0.000547383	-1.91712
WBGene00020182	ugt-53	T03D3.1	6.93e-08	-1.91274
WBGene00000669	col-94	W05B2.1	2.81e-06	-1.90514
WBGene00015403	clec-10	C03H5.1	9.92e-09	-1.89695
WBGene00015449	ugt-63	C04F5.7	1.47e-06	-1.87202
WBGene00017301		F09F7.4	9.84e-30	-1.85366
WBGene00022072	cpg-9	Y67D8C.8	9.21e-21	-1.8512
WBGene00077757		E02H4.7	2.12e-07	-1.83057
WBGene00021337		Y34F4.2	0.00089373	-1.82365
WBGene00016595		C42D4.2	0.000133754	-1.79735
WBGene00016664		C45E5.1	0.000169439	-1.76425
WBGene00045316		C49F5.9	0.00169352	-1.75506
WBGene00000620	col-43	ZC513.8	0.000353281	-1.74248
WBGene00008436		DH11.2	7.96e-14	-1.73745
WBGene00018250		F40H3.2	0.000613277	-1.73432
WBGene00010368		H06A10.1	0.000643628	-1.7275
WBGene00009787		F46F2.3	0.00152785	-1.71367
WBGene00020528	lgc-54	T15B7.16	0.00203431	-1.70739
WBGene00003522	nas-3	K06A4.1	0.00159847	-1.65552
WBGene00199137		B0547.34	0.000470896	-1.62827
WBGene00021645		Y47G6A.19	4.28e-07	-1.58742
WBGene00017691	ilys-5	F22A3.6	1.06e-14	-1.58479
WBGene00010277		F58G6.7	5.95e-07	-1.55752
WBGene00003995	pgp-1	K08E7.9	7.72e-06	-1.55016
WBGene00008566	acox-3	F08A8.3	0.00140378	-1.54761
WBGene00012883		Y45F10D.2	0.00690974	-1.52631
WBGene00001703	grd-14	T01B10.2	0.000642587	-1.5183
WBGene00008793		F14D7.6	0.00257341	-1.47157
WBGene00000723	col-150	B0024.2	4.55e-07	-1.46893
WBGene00010238		F58B4.5	2.19e-06	-1.46651
WBGene00000136	amt-4	C05E11.5	2.01e-10	-1.46145
WBGene00016875		C52D10.1	0.000109495	-1.43988
WBGene00009982		F53F1.4	0.00664037	-1.43609
WBGene00008567		F08A8.4	2.17e-05	-1.43381
WBGene00011064	adsl-1	R06C7.5	7.68e-05	-1.41841
WBGene00006925	vit-1	K09F5.2	0.000514881	-1.41513
WBGene00018744		F53B3.6	0.00159392	-1.415
WBGene00010274		F58G6.3	0.000724113	-1.39739
WBGene00016892		C53A3.2	0.000132722	-1.39021
WBGene00009902	drd-1	F49E12.9	8.58e-06	-1.38554
WBGene00000668	col-93	W05B2.5	0.0241385	-1.37895
WBGene00011486		T05E12.3	0.0146407	-1.36159
WBGene00001702	grd-13	W05E7.3	0.00199569	-1.35599
WBGene00000732	col-159	F57B1.3	1.59e-07	-1.3526
WBGene00003658	nhr-68	H12C20.3	2e-10	-1.34797
WBGene00012217		W02H3.1	0.000838952	-1.33631
WBGene00003762	nlp-24	F35B12.7	2.61e-07	-1.33572
WBGene00021236	pud-1.2	Y19D10B.7	1.15e-05	-1.32883
WBGene00009677		F44A6.5	0.00578694	-1.32804
WBGene00000733	col-160	F57B1.4	0.0144358	-1.3112
WBGene00002199	kin-15	M176.6	0.0139451	-1.30153
WBGene00020938	clec-218	W02D7.2	4.08e-06	-1.30128
WBGene00014941		Y67H2A.9	8.73e-06	-1.2986
WBGene00002025	hsp-60	Y22D7AL.5	2.74e-13	-1.26987
WBGene00000752	col-179	C34F6.3	0.0167494	-1.2578
WBGene00018343		F42A10.7	1.63e-05	-1.25597
WBGene00008594	clec-57	F08H9.6	0.0190027	-1.2507
WBGene00016957	atic-1	C55F2.1	5.81e-08	-1.24631
WBGene00011852	clec-26	T20B3.12	0.0292993	-1.24568
WBGene00020992		W03F8.2	0.0366982	-1.23869
WBGene00000118	alh-12	Y69F12A.2	3.26e-08	-1.23375
WBGene00018174		F38B6.4	7.5e-05	-1.22789
WBGene00020148		T01D1.3	0.00187387	-1.22346
WBGene00017331	ugt-40	F10D2.5	0.0221773	-1.22098
WBGene00007455	ugt-22	C08F11.8	1.3e-09	-1.21135
WBGene00022125		Y71F9B.1	0.000757749	-1.21086
WBGene00001774	gst-26	Y53F4B.29	1.13e-06	-1.2066
WBGene00012592		Y38E10A.14	2.84e-06	-1.1925
WBGene00000656	col-80	C09G5.5	0.0469248	-1.19065
WBGene00010960	atp-6	MTCE.12	0.0530782	-1.1832
WBGene00008068	sdz-6	C43D7.5	0.0490401	-1.18051
WBGene00007533	cbl-1	C12C8.2	3.17e-06	-1.17997
WBGene00018811	pmt-2	F54D11.1	5.09e-13	-1.17634
WBGene00018393	msra-1	F43E2.5	7.23e-11	-1.17337
WBGene00008936	papl-1	F18E2.1	2.37e-08	-1.16923
WBGene00000675	col-101	K02D7.3	0.0189199	-1.16908
WBGene00011676	cyp-13A2	T10B9.7	0.0537869	-1.16898
WBGene00016877		C52D10.3	0.0557534	-1.15655
WBGene00011694		T10G3.3	0.00642824	-1.15265
WBGene00000716	col-143	T15B7.3	0.00541816	-1.15028
WBGene00011006	ugt-47	R04B5.9	5.46e-07	-1.1427
WBGene00000698	col-124	C24F3.6	9.23e-08	-1.14266
WBGene00000245	bca-1	T13C5.5	6.96e-08	-1.13842
WBGene00000169	aqp-1	F32A5.5	0.000122538	-1.13567
WBGene00010034		F54B11.11	0.0728995	-1.13475
WBGene00004986	spp-1	T07C4.4	3.01e-05	-1.12799
WBGene00003485	mua-6	W10G6.3	4.25e-07	-1.12003
WBGene00015860		C16D9.5	0.0714378	-1.11877
WBGene00019550		K09C4.5	0.00152786	-1.11637
WBGene00016450	clec-5	C35D10.14	0.00033613	-1.1136
WBGene00000720	col-147	T06E4.4	0.031149	-1.11318
WBGene00000602	col-13	F15H10.2	0.0244599	-1.10741
WBGene00017336	ugt-41	F10D2.11	0.000574778	-1.1044
WBGene00010055		F54D5.12	2.86e-17	-1.09201
WBGene00006670	twk-16	F52E4.4	0.0309436	-1.09003
WBGene00016714		C46F2.1	0.0219406	-1.08339
WBGene00017730		F22H10.6	3.6e-06	-1.08097
WBGene00219609	linc-7	T22E6.2	2.33e-05	-1.07968
WBGene00007885	ugt-21	C33A12.6	0.0636545	-1.07559
WBGene00009626		F42A8.1	0.000483104	-1.07039
WBGene00014092		ZK822.5	0.000169305	-1.05768
WBGene00010989		R03D7.2	1.1e-06	-1.05705
WBGene00010225	ttr-31	F58A3.5	0.00834054	-1.05219
WBGene00001993	hpd-1	T21C12.2	1.01e-16	-1.05138
WBGene00008537		F02H6.4	0.00588664	-1.04523
WBGene00010281		F58G11.3	0.0017111	-1.04158
WBGene00007521		C11E4.7	0.00126477	-1.03967
WBGene00010456		K01C8.1	6.4e-05	-1.03643
WBGene00017126		E04F6.6	0.0613965	-1.03586
WBGene00012273		W05B2.7	0.084641	-1.03571
WBGene00009830	cutl-18	F47G9.3	0.0280509	-1.03098
WBGene00012293		W06A7.4	0.00508107	-1.02922
WBGene00015333	slc-17.3	C02C2.4	0.0663652	-1.02523
WBGene00000677	col-103	F56B3.1	0.0996249	-1.02146
WBGene00020962		W02H5.8	0.0137449	-1.02131
WBGene00015141	ugt-46	B0310.5	2.21e-06	-1.02046
WBGene00045488		F57B1.9	0.0866358	-1.01961
WBGene00017322	clec-160	F09G8.8	0.000192481	-1.01757
WBGene00008354	gcsh-1	D1025.2	0.000445961	-1.01579
WBGene00009789		F46F2.5	0.0766166	-1.0157
WBGene00002183	kat-1	T02G5.8	8.69e-11	-1.01476
WBGene00020394		T10B5.8	0.0565386	-1.01172
WBGene00013489	col-42	Y69H2.14	0.0863362	-1.00663
WBGene00021352		Y37E3.11	0.0535508	-1.00643
WBGene00021352		Y37E3.11	0.0535508	-1.00643

## Sheet: sams DOWN PA14
wormbase_id	geane_name	sequence	padj	log2FoldChange
WBGene00044644		B0205.13	1.16e-16	-2.80514
WBGene00044107		F58G6.9	4.81e-11	-2.5074
WBGene00016875		C52D10.1	8.1e-09	-2.29419
WBGene00009221	acs-2	F28F8.2	3.49e-07	-2.21255
WBGene00007605	asp-10	C15C8.3	1.88e-12	-2.19503
WBGene00009787		F46F2.3	3.95e-10	-2.09957
WBGene00006404	tag-10	C31C9.1	1.13e-09	-2.07684
WBGene00219410		C04C3.14	1.41e-05	-2.02652
WBGene00000372	cyp-13A7	T10B9.10	1.36e-05	-2.01467
WBGene00007885	ugt-21	C33A12.6	6.31e-05	-1.83097
WBGene00020674		T22B7.7	4.89e-08	-1.83019
WBGene00013007		Y48E1B.8	4.36e-05	-1.82513
WBGene00017315	ugt-36	F09G2.6	0.000158992	-1.80654
WBGene00010904	ugt-62	M88.1	3.71e-06	-1.7797
WBGene00020989		W03D8.8	7.24e-05	-1.77414
WBGene00011521		T06C12.14	0.000271041	-1.75993
WBGene00019515	ugt-19	K08B4.3	1.08e-06	-1.75178
WBGene00000785	cpr-5	W07B8.5	2.75e-07	-1.73896
WBGene00010470	cdr-4	K01D12.11	4.82e-07	-1.71025
WBGene00235332		K04A8.20	0.000538695	-1.67769
WBGene00006539	tbb-6	T04H1.9	0.000366566	-1.61962
WBGene00000988	dhs-25	F09E10.3	1.82e-06	-1.61493
WBGene00003995	pgp-1	K08E7.9	0.00038601	-1.59156
WBGene00001156	ech-7	Y105E8A.4	9.23e-06	-1.54463
WBGene00017658		F21C10.9	0.00022113	-1.5402
WBGene00006925	vit-1	K09F5.2	7.3e-05	-1.52901
WBGene00001993	hpd-1	T21C12.2	1.01e-06	-1.52701
WBGene00007947		C35A5.3	0.00271104	-1.52556
WBGene00016877		C52D10.3	0.00507172	-1.51093
WBGene00021070	cpr-8	W07B8.1	0.00113064	-1.50926
WBGene00017691	ilys-5	F22A3.6	0.000159001	-1.5003
WBGene00009824	gpdh-1	F47G4.3	0.004919	-1.49803
WBGene00004802	sir-2.3	F46G10.3	0.000940332	-1.47327
WBGene00008560	pho-13	F07H5.9	0.00373177	-1.4703
WBGene00009628	tatn-1	F42D1.2	2.97e-05	-1.46514
WBGene00019935		R07E4.1	0.000197954	-1.43977
WBGene00020128		R193.2	0.00510664	-1.41991
WBGene00011753		T13F3.6	0.000610232	-1.41621
WBGene00017322	clec-160	F09G8.8	0.000559889	-1.41507
WBGene00015894	acdh-2	C17C3.12	0.00942729	-1.38183
WBGene00000784	cpr-4	F44C4.3	0.000286814	-1.37798
WBGene00045275		F18E3.12	0.0170633	-1.37208
WBGene00007073	ugt-2	AC3.8	0.000940332	-1.36731
WBGene00005002	spp-17	C54G6.5	0.00034585	-1.36042
WBGene00016874		C52B11.5	8.43e-05	-1.35838
WBGene00021335	spp-23	Y34D9A.11	0.0178291	-1.33925
WBGene00008891	clec-42	F16H6.1	0.0206634	-1.33354
WBGene00008296	cdr-2	C54D10.1	0.000630236	-1.33198
WBGene00009518	clec-166	F38A1.5	0.0265956	-1.31619
WBGene00017962	fbxa-72	F31F4.15	0.00380218	-1.316
WBGene00044642	clec-69	F56D6.15	0.00556239	-1.30791
WBGene00010274		F58G6.3	0.0237008	-1.30495
WBGene00016872	dop-4	C52B11.3	0.00383715	-1.29088
WBGene00021581	clec-70	Y46C8AL.3	0.00695158	-1.28392
WBGene00001757	gst-9	R05F9.5	0.0363695	-1.27712
WBGene00016274		C30G12.2	0.0106479	-1.27017
WBGene00006530	tba-4	F44F4.11	0.00399991	-1.26722
WBGene00009515	clec-170	F38A1.1	0.0325928	-1.26325
WBGene00007808	best-7	C29F4.2	0.0129137	-1.25783
WBGene00010277		F58G6.7	0.026545	-1.25644
WBGene00004006	pgp-12	F22E10.1	0.0118808	-1.25272
WBGene00019376	lipl-4	K04A8.5	0.0370873	-1.22831
WBGene00016892		C53A3.2	0.00948725	-1.22234
WBGene00017705		F22E5.6	0.0539782	-1.21698
WBGene00018138	folt-2	F37B4.7	0.00241009	-1.2169
WBGene00016797		C50A2.3	0.0177728	-1.20616
WBGene00019097		F59B1.2	0.0024829	-1.19546
WBGene00009982		F53F1.4	0.00806006	-1.18512
WBGene00003093	lys-4	F58B3.1	0.00150777	-1.17579
WBGene00009706	argk-1	F44G3.2	0.0699794	-1.17504
WBGene00011112		R07E5.4	0.0334892	-1.16601
WBGene00019550		K09C4.5	0.0201464	-1.16278
WBGene00006351	sur-5	K03A1.5	0.0149057	-1.14518
WBGene00016294		C31H2.4	0.0621134	-1.13621
WBGene00199137		B0547.34	0.0923215	-1.11582
WBGene00016939		C55B6.1	0.0127405	-1.11059
WBGene00003705	nhr-115	T27B7.4	0.0514817	-1.108
WBGene00020921		W01C8.5	0.0053052	-1.10363
WBGene00001240	elo-2	F11E6.5	0.0026287	-1.09997
WBGene00013263		Y57A10A.23	0.0454793	-1.08667
WBGene00016920		C54E4.5	0.0205031	-1.07591
WBGene00015449	ugt-63	C04F5.7	0.0929614	-1.07482
WBGene00018259		F41B4.3	0.0333572	-1.06445
WBGene00019967	cyp-33C8	R08F11.3	0.020489	-1.0572
WBGene00000191	arl-7	F20D1.5	0.0511622	-1.04833
WBGene00015623		C09B8.4	0.0994103	-1.04808
WBGene00019664		K11H12.8	0.075707	-1.04412
WBGene00000245	bca-1	T13C5.5	0.0270144	-1.03298
WBGene00017719	ldp-1	F22F7.1	0.0390603	-1.0198
WBGene00017301		F09F7.4	0.0359161	-1.01912
WBGene00019322	ahcy-1	K02F2.2	0.00921853	-1.01099
WBGene00006588	tnt-3	C14F5.3	0.0178033	-1.00943

## Sheet: set2 DOWN PA14
wormbase_id	geane_name	sequence	padj	log2FoldChange
WBGene00004412	rpl-1	Y71F9AL.13	5.75e-21	-4.2965
WBGene00007947		C35A5.3	3.94e-25	-3.68539
WBGene00018138	folt-2	F37B4.7	5.3e-76	-3.67503
WBGene00012608		Y38F1A.6	4.74e-61	-3.18391
WBGene00007422	ugt-17	C08B6.1	1.24e-17	-2.88645
WBGene00015894	acdh-2	C17C3.12	5.43e-10	-2.83509
WBGene00015449	ugt-63	C04F5.7	4.94e-16	-2.6499
WBGene00008205	sams-1	C49F5.1	6.12e-21	-2.58386
WBGene00013007		Y48E1B.8	9.94e-09	-2.55319
WBGene00017567		F18E3.11	3.28e-09	-2.55034
WBGene00004062	pmp-5	T10H9.5	6.49e-12	-2.50785
WBGene00012538		Y37A1B.5	1.82e-13	-2.48297
WBGene00000620	col-43	ZC513.8	1.99e-08	-2.46279
WBGene00006404	tag-10	C31C9.1	2.49e-11	-2.46226
WBGene00003704	nhr-114	Y45G5AM.1	3.26e-18	-2.41617
WBGene00016943	acdh-1	C55B7.4	9.39e-15	-2.36971
WBGene00021233		Y19D10B.4	3.57e-06	-2.31723
WBGene00017881	asp-13	F28A12.4	1.5e-20	-2.30831
WBGene00045275		F18E3.12	5.17e-06	-2.29179
WBGene00003522	nas-3	K06A4.1	1.32e-07	-2.25724
WBGene00017962	fbxa-72	F31F4.15	3.18e-08	-2.24246
WBGene00021335	spp-23	Y34D9A.11	2.09e-06	-2.20292
WBGene00015623		C09B8.4	8.25e-06	-2.1813
WBGene00016027		C23H5.8	8.15e-10	-2.16695
WBGene00005444	srh-237	T05E12.7	6.83e-05	-2.15967
WBGene00011487		T05E12.6	7.96e-27	-2.13947
WBGene00010368		H06A10.1	5.01e-06	-2.11085
WBGene00016644	abhd-3.2	C44C1.5	1.41e-10	-2.10794
WBGene00014003		ZK593.3	7.08e-06	-2.09019
WBGene00016664		C45E5.1	1.36e-06	-2.07077
WBGene00009902	drd-1	F49E12.9	5.46e-09	-2.05761
WBGene00005444	srh-237	T05E12.7	0.000167718	-1.97122
WBGene00000722	col-149	B0024.1	1.03e-05	-1.95556
WBGene00017565	ddo-2	F18E3.7	8.32e-09	-1.9326
WBGene00009221	acs-2	F28F8.2	0.000145012	-1.92107
WBGene00013904	ugt-6	ZC455.4	5.87e-05	-1.89322
WBGene00002055	ifc-1	F37B4.2	2.51e-08	-1.85669
WBGene00008567		F08A8.4	5.76e-08	-1.84914
WBGene00077757		E02H4.7	2.44e-07	-1.83049
WBGene00016942		C55B7.3	0.000426347	-1.81098
WBGene00045399		Y47G6A.33	4.71e-08	-1.79627
WBGene00000988	dhs-25	F09E10.3	2.75e-10	-1.79483
WBGene00045276		F18E3.13	2.11e-05	-1.78927
WBGene00000136	amt-4	C05E11.5	1.31e-07	-1.77581
WBGene00020938	clec-218	W02D7.2	4.37e-05	-1.77461
WBGene00008341	ttr-44	C56A3.2	6.21e-07	-1.76706
WBGene00009334		F32D8.12	1.19e-09	-1.75876
WBGene00044107		F58G6.9	0.00159969	-1.75645
WBGene00017485		F15E6.4	9.58e-05	-1.70273
WBGene00017691	ilys-5	F22A3.6	1.13e-12	-1.69803
WBGene00003995	pgp-1	K08E7.9	0.000496473	-1.66628
WBGene00000723	col-150	B0024.2	0.000104104	-1.65872
WBGene00008566	acox-3	F08A8.3	3.65e-05	-1.63224
WBGene00012217		W02H3.1	8.24e-05	-1.62454
WBGene00014057		ZK673.1	0.000838856	-1.6174
WBGene00043302		F32D8.11	0.00137514	-1.60941
WBGene00021337		Y34F4.2	0.00970648	-1.573
WBGene00010238		F58B4.5	5.71e-05	-1.57121
WBGene00010411		H25K10.1	0.0102177	-1.56003
WBGene00001155	ech-6	T05G5.6	2.29e-18	-1.55566
WBGene00017775		F25B5.3	0.000253221	-1.55071
WBGene00007455	ugt-22	C08F11.8	0.000191882	-1.53106
WBGene00001068	dpy-6	F16F9.2	0.00223431	-1.52586
WBGene00006925	vit-1	K09F5.2	6.43e-09	-1.50199
WBGene00015403	clec-10	C03H5.1	0.000598801	-1.4842
WBGene00008436		DH11.2	2.77e-06	-1.47992
WBGene00000731	col-158	D2023.7	0.0143691	-1.45789
WBGene00019097		F59B1.2	0.000289521	-1.44932
WBGene00000669	col-94	W05B2.1	9.83e-13	-1.41451
WBGene00015860		C16D9.5	0.0254429	-1.40634
WBGene00016892		C53A3.2	0.00315389	-1.40558
WBGene00017301		F09F7.4	3.43e-12	-1.39257
WBGene00011006	ugt-47	R04B5.9	0.000314069	-1.38222
WBGene00045067		F07C6.6	0.0338522	-1.37618
WBGene00000733	col-160	F57B1.4	2.68e-05	-1.37326
WBGene00009493	hrg-4	F36H1.5	0.0386713	-1.36814
WBGene00016957	atic-1	C55F2.1	4.1e-06	-1.36685
WBGene00017658		F21C10.9	0.0292019	-1.3485
WBGene00022072	cpg-9	Y67D8C.8	6.38e-05	-1.34339
WBGene00003511	mxl-3	F46G10.6	2.31e-05	-1.34051
WBGene00007605	asp-10	C15C8.3	0.0400454	-1.33679
WBGene00009787		F46F2.3	0.0441987	-1.32652
WBGene00011262	pho-8	R13H4.3	0.0483561	-1.32503
WBGene00008594	clec-57	F08H9.6	0.0133497	-1.31874
WBGene00019473	cyp-35A5	K07C6.5	0.0546413	-1.29942
WBGene00017322	clec-160	F09G8.8	0.000860944	-1.28407
WBGene00011694		T10G3.3	0.00535703	-1.28027
WBGene00020128		R193.2	0.00207578	-1.26103
WBGene00012593	nspe-7	Y38E10A.15	0.0672415	-1.2556
WBGene00022125		Y71F9B.1	0.00241054	-1.24248
WBGene00010277		F58G6.7	0.00114962	-1.23679
WBGene00018744		F53B3.6	0.0200224	-1.2301
WBGene00001774	gst-26	Y53F4B.29	0.000971899	-1.22959
WBGene00003658	nhr-68	H12C20.3	9.47e-05	-1.22371
WBGene00002199	kin-15	M176.6	0.0375826	-1.2229
WBGene00010274		F58G6.3	0.0323682	-1.21398
WBGene00011852	clec-26	T20B3.12	0.0682708	-1.20564
WBGene00007963	cyp-25A1	C36A4.1	0.00821924	-1.20392
WBGene00199137		B0547.34	0.0379443	-1.20239
WBGene00003691	nhr-101	H12C20.6	0.0429207	-1.19922
WBGene00000752	col-179	C34F6.3	0.00112819	-1.19632
WBGene00014092		ZK822.5	0.000203945	-1.18405
WBGene00013073	hmit-1.1	Y51A2D.4	0.00367034	-1.18298
WBGene00014941		Y67H2A.9	0.00107179	-1.16965
WBGene00017336	ugt-41	F10D2.11	0.0148654	-1.15876
WBGene00019550		K09C4.5	0.00428941	-1.15802
WBGene00011486		T05E12.3	0.0871003	-1.15689
WBGene00008595	clec-56	F08H9.7	0.00142111	-1.15401
WBGene00011554		T07A5.1	0.0929124	-1.15308
WBGene00016797		C50A2.3	0.00193949	-1.14677
WBGene00022076	daao-1	Y69A2AR.5	0.0965139	-1.14036
WBGene00009902	drd-1	F49E12.9	0.00289694	-1.14022
WBGene00000111	alh-5	T08B1.3	0.0627422	-1.13823
WBGene00015052	clec-52	B0218.8	0.0808549	-1.13694
WBGene00018393	msra-1	F43E2.5	5.93e-05	-1.12888
WBGene00003485	mua-6	W10G6.3	2.87e-05	-1.12811
WBGene00009883		F49C12.14	0.0778343	-1.11465
WBGene00001993	hpd-1	T21C12.2	2.81e-05	-1.11324
WBGene00018174		F38B6.4	0.00479203	-1.11009
WBGene00009626		F42A8.1	0.000499615	-1.10782
WBGene00018811	pmt-2	F54D11.1	5.9e-06	-1.08958
WBGene00012615	dct-16	Y38H6C.1	0.00114147	-1.08603
WBGene00012592		Y38E10A.14	0.0266441	-1.08001
WBGene00000169	aqp-1	F32A5.5	0.00157002	-1.07762
WBGene00010960	atp-6	MTCE.12	0.0113449	-1.07207
WBGene00009677		F44A6.5	0.063133	-1.06886
WBGene00001244	elo-6	F41H10.8	0.000414256	-1.0562
WBGene00017874	acdh-9	F28A10.6	3.72e-05	-1.05187
WBGene00016714		C46F2.1	0.0898449	-1.04973
WBGene00007533	cbl-1	C12C8.2	0.00160512	-1.04831
WBGene00008936	papl-1	F18E2.1	0.000465821	-1.04186
WBGene00015141	ugt-46	B0310.5	0.0042005	-1.04053
WBGene00008390		D1086.3	0.025519	-1.03046
WBGene00000716	col-143	T15B7.3	0.000164558	-1.0295
WBGene00016875		C52D10.1	0.0350042	-1.02045
WBGene00002025	hsp-60	Y22D7AL.5	9.87e-05	-1.01146
WBGene00008923		F17C11.12	0.0543196	-1.00133

## Sheet: set16 DOWN PA14
wormbase_id	geane_name	sequence	padj	log2FoldChange
WBGene00004412	rpl-1	Y71F9AL.13	1.06e-49	-5.94686
WBGene00008341	ttr-44	C56A3.2	9.1e-46	-3.84778
WBGene00020139		T01B11.2	3.3e-12	-3.45033
WBGene00007422	ugt-17	C08B6.1	1.8e-13	-2.90373
WBGene00003995	pgp-1	K08E7.9	2.18e-14	-2.83584
WBGene00013904	ugt-6	ZC455.4	3.16e-10	-2.69806
WBGene00021335	spp-23	Y34D9A.11	8.01e-18	-2.46571
WBGene00000723	col-150	B0024.2	7.32e-06	-2.22711
WBGene00008567		F08A8.4	3.92e-08	-2.22147
WBGene00077757		E02H4.7	8e-08	-2.22
WBGene00006404	tag-10	C31C9.1	1.81e-16	-2.20502
WBGene00003704	nhr-114	Y45G5AM.1	3.12e-10	-2.13314
WBGene00010368		H06A10.1	3.16e-06	-2.12886
WBGene00004062	pmp-5	T10H9.5	2.53e-14	-2.11836
WBGene00008566	acox-3	F08A8.3	2.75e-06	-2.05272
WBGene00015860		C16D9.5	0.00018707	-2.04858
WBGene00019495	sdz-24	K07E8.3	6.58e-08	-2.01617
WBGene00044107		F58G6.9	0.000110783	-1.93846
WBGene00019208	lips-14	H17B01.3	0.00129564	-1.84548
WBGene00009787		F46F2.3	1.62e-10	-1.81165
WBGene00013379		Y62E10A.13	5.31e-05	-1.78624
WBGene00000722	col-149	B0024.1	6.36e-05	-1.74469
WBGene00016644	abhd-3.2	C44C1.5	0.000305888	-1.72957
WBGene00017658		F21C10.9	0.00340341	-1.7277
WBGene00009518	clec-166	F38A1.5	0.00249814	-1.69231
WBGene00012608		Y38F1A.6	3.44e-06	-1.6485
WBGene00000720	col-147	T06E4.4	0.000434196	-1.61255
WBGene00010238		F58B4.5	6.36e-05	-1.60774
WBGene00005444	srh-237	T05E12.7	0.00989778	-1.57704
WBGene00043302		F32D8.11	0.00257853	-1.55824
WBGene00017312	pitr-5	F09G2.3	0.000684582	-1.55353
WBGene00017512	nhr-179	F16B4.11	0.00274464	-1.55034
WBGene00008891	clec-42	F16H6.1	0.0012579	-1.54908
WBGene00000136	amt-4	C05E11.5	2.59e-05	-1.5111
WBGene00013007		Y48E1B.8	0.00611615	-1.50688
WBGene00000966	dhs-2	F55A12.4	0.000834689	-1.49673
WBGene00011112		R07E5.4	8.1e-06	-1.48831
WBGene00020992		W03F8.2	0.0155293	-1.4782
WBGene00018343		F42A10.7	7.5e-11	-1.47633
WBGene00017962	fbxa-72	F31F4.15	0.000180208	-1.46479
WBGene00017691	ilys-5	F22A3.6	0.0134352	-1.43951
WBGene00014003		ZK593.3	0.0228565	-1.43134
WBGene00018603		F48E3.2	0.0241058	-1.42203
WBGene00019097		F59B1.2	0.000902917	-1.42054
WBGene00008205	sams-1	C49F5.1	0.0116952	-1.41553
WBGene00011801		T16G1.7	0.00172238	-1.41151
WBGene00016027		C23H5.8	0.0063172	-1.40281
WBGene00016875		C52D10.1	0.00482102	-1.40183
WBGene00010411		H25K10.1	0.0299747	-1.40148
WBGene00007963	cyp-25A1	C36A4.1	0.00483407	-1.39843
WBGene00045316		C49F5.9	0.0263845	-1.38286
WBGene00017881	asp-13	F28A12.4	9.76e-05	-1.37576
WBGene00019368		K03H6.2	5.78e-07	-1.35246
WBGene00007605	asp-10	C15C8.3	0.000305365	-1.33338
WBGene00021233		Y19D10B.4	0.0461625	-1.32594
WBGene00016204	gsto-1	C29E4.7	0.0448263	-1.32173
WBGene00001774	gst-26	Y53F4B.29	0.000554587	-1.30181
WBGene00015449	ugt-63	C04F5.7	1.58e-05	-1.29514
WBGene00011753		T13F3.6	0.00461538	-1.29421
WBGene00000669	col-94	W05B2.1	7.15e-10	-1.27229
WBGene00014057		ZK673.1	0.0366606	-1.26598
WBGene00002199	kin-15	M176.6	0.0365131	-1.26178
WBGene00020167		T02G5.11	0.0477954	-1.25788
WBGene00022562		ZC204.12	0.00593943	-1.24523
WBGene00003522	nas-3	K06A4.1	0.0212926	-1.23779
WBGene00007947		C35A5.3	0.0771216	-1.22645
WBGene00018616		F48G7.5	0.0723185	-1.22298
WBGene00018138	folt-2	F37B4.7	5.4e-06	-1.20554
WBGene00008560	pho-13	F07H5.9	0.0694178	-1.20131
WBGene00012883		Y45F10D.2	0.0784545	-1.20086
WBGene00022548		ZC196.4	0.0681806	-1.19543
WBGene00015370		C03A7.12	0.0820633	-1.19503
WBGene00008595	clec-56	F08H9.7	0.01971	-1.18866
WBGene00015333	slc-17.3	C02C2.4	0.0863317	-1.18438
WBGene00016943	acdh-1	C55B7.4	0.0868535	-1.1723
WBGene00016174		C27H5.4	0.0045109	-1.17135
WBGene00000703	col-129	M18.1	0.00570171	-1.17132
WBGene00012217		W02H3.1	0.0300654	-1.1681
WBGene00009512		F37H8.3	0.057779	-1.16643
WBGene00000732	col-159	F57B1.3	0.00152881	-1.15974
WBGene00020938	clec-218	W02D7.2	0.0219998	-1.15057
WBGene00009334		F32D8.12	0.00260484	-1.14636
WBGene00007533	cbl-1	C12C8.2	2.46e-06	-1.13938
WBGene00011694		T10G3.3	0.02505	-1.13151
WBGene00007536	daf-36	C12D8.5	0.00916288	-1.12605
WBGene00006191	str-144	C09H5.5	0.0891162	-1.12173
WBGene00001574	gei-17	W10D5.3	0.0122718	-1.09514
WBGene00017730		F22H10.6	0.00468088	-1.0908
WBGene00002055	ifc-1	F37B4.2	0.0124034	-1.08727
WBGene00004444	rpl-30	Y106G6H.3	0.00327199	-1.08278
WBGene00012781	nspd-7	Y43C5A.1	0.0549228	-1.07749
WBGene00018602		F48D6.4	3.76e-13	-1.07537
WBGene00015087		B0252.1	0.0994883	-1.07269
WBGene00012615	dct-16	Y38H6C.1	2e-06	-1.07119
WBGene00016957	atic-1	C55F2.1	4.55e-05	-1.06874
WBGene00001403	fbl-1	F56H11.1	0.0698756	-1.05305
WBGene00019830	hrg-1	R02E12.6	0.0449372	-1.03821
WBGene00000657	col-81	F38A3.1	0.0101087	-1.03526
WBGene00011006	ugt-47	R04B5.9	3.31e-05	-1.03457
WBGene00022125		Y71F9B.1	0.0258834	-1.0201
WBGene00045399		Y47G6A.33	0.00281437	-1.01971
