# Supplementary material for: Stress-responsive and metabolic gene regulation are altered in low S-adenosylmethionine
Source: PLoS Genet. 2018 Nov 28;14(11):e1007812. doi: 10.1371/journal.pgen.1007812 (PMC6287882; doi:10.1371/journal.pgen.1007812)
Supplement: S7 Table — GO term categories that are also represented in our tool are highlighted in yellow. (XLSX) [file pgen.1007812.s015.xlsx]

## Sheet: sbp-1 UP
Category 1	Category 2	Category 3	Regulated Gene number	P value
Stress response (504)			74	4.79901e-34
	Stress response: pathogen (166)		45	2.51858e-31
	Stress response: other (102)		13	7.73704e-07
	Stress response: ER (16)		4	0.000636956
	Stress response: heat (37)		4	0.00948327
Lectin (234)			12	0.00509346
	Lectin: Galectin (23)		3	0.0153495
	Lectin: C type (207)		9	0.0340117
Transcription factor (625)			23	0.00873102
	Transcription factor: bZIP (23)		4	0.00205922
	Transcription factor: ETS (13)		2	0.0362646
Proteolysis general (394)			15	0.0225199
	Proteolysis general: cathepsin (41)		4	0.013088
Other Categories
	Development (405)		18	0.00323029
	Metabolism: lipid (487)		21	0.00223668
		Epoxide hydratase (30)	9	7.5155e-08
		Phospholipid (60)	5	0.01045
	Unknown: Stress response: regulated by multiple stresses (2382)		88	2.28443e-06
	Unknown: Lipid storage: RNAi only (79)		6	0.00788829
	Signaling: FERM (6)		2	0.0106247
	Neuronal function: locomotion (21)		3	0.012314
	Transmembrane transport: ABC (48)		4	0.0212741
	Cytoskeleton: intermediate filament protein (11)		2	0.0276701
	Transmembrane protein (388)		13	0.0297374
	Cytoskeleton: Tubulin (15)		2	0.0457354
		Proteolysis proteosome: E3: SCF (31)	4	0.00539904
		Signaling: small GTPase: Ras (38)	4	0.010315
		Trafficking: ER/Golgi: COP I (10)	2	0.0237294
		Signaling: phosphatase: acid (29)	3	0.026766
		Cytoskeleton: Actin: binding (12)	2	0.0318523
		Transcription: chromatin modfication: acetyltransferase (15)	2	0.0457354
				Mindingetabolism: lipid: b

## Sheet: sbp-1 DOWN
Category 1	Category 2	Category 3	Gene number	P value
Metabolism (1652)			49	5.80408e-17
	Lipid (487)		35	4.16647e-25
		Fatty acid (66)	13	1.02494e-15
		Beta oxidation (79)	12	1.95264e-13
		Binding (66)	3	0.00633642
		Sterol (53)	3	0.0356503
		CoA (9)	1	0.052395
	1CC (30)		2	0.0129259
		Methionine (5)	1	0.0317774
	Amino acid (111)		3	0.0242754
Stress response (504)			12	0.00075884
	GST (47)		4	0.000176741
	Stress response: pathogen (177)		4	0.0174316
Transmembrane transport (836)			10	0.0197195
	Transmembrane transport (53)		2	0.0356503
	Transmembrane transport: ammonium (6)		1	0.0369738
DNA/RNA nuclease (9)			1	0.052395
Other Categories
	Protein modification: carbohydrate (212)		4	0.0319906
		Trafficking: ER/Golgi: Traffic other	5	0.0317774
		Signaling: lipid: phospholipase (58)	2	0.0417463
		Protein modification: carbohydrate (215)	4	0.0319906

## Sheet: sams-1 UP
Category 1	Category 2	Category 3	Regulated Gene number	P value
Stress response (504)			100	1.35741e-31
	Pathogen (177)		47	2.6032e-20
	Other (102)		22	5.82416e-09
	ER (16)		8	2.85743e-06
	Oxidative (27)		5	0.00855607
	Heavy metal (19)		4	0.0125425
	CYP (79)		8	0.024059
Transcription factor (625)			58	1.98451e-07
	NHR (282)		29	3.32677e-05
	bZIP (23)		7	0.000154039
	CREB (2)		2	0.00917879
	ETS (13)		3	0.0245589
Proteolysis proteosome (763)			58	4.7222e-05
	E3 (626)		55	1.78652e-06
		F box (483)	41	6.24891e-05
		SCF (31)	5	0.0140312
Metabolism (1652)			104	0.00014276
	Lipid (487)		60	9.04992e-12
		Epoxide hydratase (30)	11	4.72061e-07
		Fatty acid (66)	10	0.000943983
		Phospholipid (60)	9	0.00177447
		Beta oxidation (79)	8	0.024059
		Glycerolipid (25)	4	0.0278144
		Lipase (28)	4	0.03832
		Sphingolipid (42)	5	0.0398116
	1CC (30)		5	0.0124883
	Carbohydrate (73)		8	0.0163285
Development (411)			34	0.000370015
Neuronal function (351)			29	0.00094851
	Peptide (121)		14	0.00117264
	Signaling (63)		10	0.000685687
Transmembrane transport (836)			51	0.00875368
	ABC (48)		10	9.9888e-05
	Anion (7)		2	0.0481632
	Sodium transport (5)		3	0.00312475
Proteolysis general (384)			24	0.0546496
Other Categories
	Unknown: Stress response: regulated by multiple stresses 2382)		140	0.000239099
	Cytoskeleton: other (193)		18	0.00245413
	Protein modification: carbohydrate (215)		18	0.00684384
	Transmembrane protein (338)		24	0.0129574
	Cytoskeleton: intermediate filament protein (11)		3	0.016947
	Unknown: Lipid storage: RNAi only (79)		8	0.024059
	Signaling: FERM (6)		2	0.0384707
	Signaling: TGF beta (17)		3	0.044397
		Signaling: lipid: phospholipase (58)	7	0.0154708
		Signaling: phosphatase: acid (29)	5	0.0110643
		Signaling: phosphatase: dual specificity (7)	2	0.0481632
